# Supplementary material
Source: Royal Society of Chemistry journal article supplement (doi:10.1039/d6ob00710d)

## Supporting Information

### **Copper-catalyzed trifluoromethylation of vinyl azides with BrCF<sub>2</sub>CO<sub>2</sub>K: synthesis of $\alpha$ -trifluoromethyl ketones without external fluoride sources**

Qinhong Wen, Tianhao Zhang, Xinyu Jia, Yu Wang, Yue Zhao, Taichen Liu, Kai  
Wei, Zhenghui Kang\* and Jiuling Li\*

*School of Medical Sciences, Pingdingshan University, Pingdingshan 467000, P. R. China*

*School of Chinese Materia Medica, Nanjing University of Chinese Medicine, Nanjing 210023,  
China*

*Zhongshan Institute for Drug Discovery, Shanghai Institute of Materia Medica, Chinese Academy  
of Sciences. Zhongshan 528400, P. R. China*

*School of Chemistry and Pharmaceutical Sciences, Guangxi Normal University. Guilin 541004, P.  
R. China*

E-mail: orgchem90@163.com

kangzhenghui@simm.ac.cn

|                                          |    |
|------------------------------------------|----|
| 1. General information & materials ..... | 1  |
| 2. Experimental procedures .....         | 2  |
| 3. Control experiments.....              | 2  |
| 4. Reference .....                       | 5  |
| 5. Analytical data of products .....     | 6  |
| 6. NMR spectra of products .....         | 16 |

## 1. General information & materials

**General:** All  $^1\text{H}$  NMR (400 MHz, 500 MHz, 600 MHz) and  $^{13}\text{C}$  NMR (100 MHz, 125 MHz, 150 MHz) and  $^{19}\text{F}$  NMR (376 MHz, 470 MHz, 564 MHz) spectra were recorded on 400 MHz or 500 MHz spectrometers in  $\text{CDCl}_3$  and DMSO. Chemical shifts were reported in ppm with the solvent signal as reference, and coupling constants ( $J$ ) were given in Hertz. The peak information was described as: s = singlet, d = doublet, t = triplet, q = quartet, m = multiplet, br = broad. High-resolution mass spectrometry (HRMS) was recorded on a commercial apparatus (ESI Source).

**Materials:** Precoated silica gel plates GF-254 were used for analytical thin-layer chromatography. Column chromatography was performed on silica gel (300-400 mesh). Materials were prepared according to the known procedure and had physical and spectral properties identical to those earlier reported. Unless otherwise noted, all reagents were obtained commercially and used without further purification. Starting materials (alkenyl azide **1**) were prepared according to literature procedures<sup>1</sup>.



chromatography (eluent: EA:PE = 1/20~1/10) to give the pure product **7** (62% yield).

**Synthetic application (b):** To an oven-dried 15 mL Schlenk tube equipped with a stir bar was added  $\text{KHCO}_3$  (0.6 mmol, 3.0 equiv),  $\alpha$ -trifluoromethyl ketone **4a** (0.2 mmol, 1.0 equiv), and benzamidinium hydrochloride **8** (0.22 mmol, 1.1 equiv), and suspended in 1,4-dioxane (2 mL). The resulting mixture was stirred at 60 °C for 12 hours. The progress of the reaction was monitored by TLC. After the reaction was complete, the reaction was cooled to room temperature and concentrated under reduced pressure. The residue was purified by flash column chromatography (eluent: EA:PE = 1/40~1/20) to give the pure product **9** (75% yield).

**Synthetic application (c):** To a 25 mL reaction flask equipped with a stir bar was added  $\alpha$ -trifluoromethyl ketone **4h** (0.2 mmol, 1.0 equiv) and *p*-ABSA (4-acetamidobenzenesulfonyl azide, 0.24 mmol, 1.2 equiv), and suspended in acetonitrile (5 mL). The resulting mixture was stirred at 0 °C, and added DBU (1,8-diazabicyclo [5.4.0] undec-7-ene, 0.22 mmol, 1.1 equiv) dropwise. After the reaction was complete, the reaction was warmed to room temperature and concentrated under reduced pressure. The residue was purified by flash column chromatography (eluent: EA:PE = 1/40~1/20) to give the pure product **10** (68% yield).

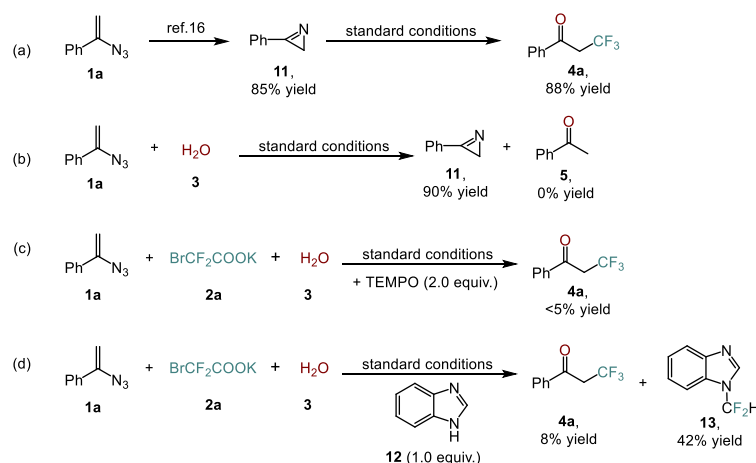

**Control experiment (a):** 2*H*-Azirine **11** was prepared according to our previous work<sup>1</sup>. The (1-azidovinyl)benzene **1a** (0.5 mmol) was stirred in toluene (3 mL) at 100 °C, and the progress of the reaction was monitored by TLC. After the reaction was complete, the mixture was purified by flash column chromatography (petroleum ether/ethyl acetate 30:1) to give the pure product **11** in 85% yield. Then, to an oven-dried 15 mL Schlenk tube equipped with a stir bar was added CuCl (2.0 mg, 0.02 mmol, 10.0 mol%),  $\text{BrCF}_2\text{COOK}$  **2a** (85 mg, 0.4 mmol, 2.0 equiv), 4.0  $\mu\text{L}$   $\text{H}_2\text{O}$  and 2*H*-azirine

**11** (0.2 mmol, 1.0 equiv), and suspended in anhydrous CH<sub>3</sub>CN (2.0 mL) under dry argon atmosphere. The resulting mixture was stirred at 70°C for 6 hours. The progress of the reaction was monitored by TLC. After the reaction was complete, the reaction was cooled to room temperature and concentrated under reduced pressure. The residue was purified by flash column chromatography (eluent: EA:PE = 1/40~1/20) to give the pure product **4a** (88% yield).

**Control experiment (b):** To an oven-dried 15 mL Schlenk tube equipped with a stir bar was added CuCl (2.0 mg, 0.02 mmol, 10.0 mol%), 4.0 μL H<sub>2</sub>O and vinyl azide **1a** (0.2 mmol, 1.0 equiv), and suspended in anhydrous CH<sub>3</sub>CN (2.0 mL) under dry argon atmosphere. The resulting mixture was stirred at 70°C for 6 hours. The progress of the reaction was monitored by TLC. After the reaction was complete, the reaction was cooled to room temperature and concentrated under reduced pressure. The residue was purified by flash column chromatography (eluent: EA:PE = 1/40~1/20) to give the pure 2*H*-azirine **11** (90% yield).

**Control experiment (c):** To an oven-dried 15 mL Schlenk tube equipped with a stir bar was added CuCl (2.0 mg, 0.02 mmol, 10.0 mol%), BrCF<sub>2</sub>COOK **2a** (85 mg, 0.4 mmol, 2.0 equiv), 4.0 μL H<sub>2</sub>O, vinyl azide **1a** (29 mg, 0.2 mmol, 1.0 equiv), and TEMPO (0.4 mmol, 2.0 equiv) and suspended in anhydrous CH<sub>3</sub>CN (2.0 mL) under dry argon atmosphere. The resulting mixture was stirred at 70°C for 6 hours. The progress of the reaction was monitored by TLC, and only trace amounts of product **4a** were detected.

**Control experiment (d):** To an oven-dried 15 mL Schlenk tube equipped with a stir bar was added CuCl (2.0 mg, 0.02 mmol, 10.0 mol%), BrCF<sub>2</sub>COOK **2a** (85 mg, 0.4 mmol, 2.0 equiv), 4.0 μL H<sub>2</sub>O, vinyl azide **1a** (29 mg, 0.2 mmol, 1.0 equiv), and benzimidazole **12** (0.2 mmol, 1.0 equiv) and suspended in anhydrous CH<sub>3</sub>CN (2.0 mL) under dry argon atmosphere. The resulting mixture was stirred at 70°C for 6 hours. The progress of the reaction was monitored by TLC. After the reaction was complete, the reaction was cooled to room temperature and concentrated under reduced pressure. The residue was purified by flash column chromatography (eluent: EA:PE = 1/40~1/10) to give the pure product **4a** (8% yield) and difluoromethylated benzimidazole product **13** (42% yield).

## 4 Reference

- [1] J. Li, X. Jia, J. Qiu, M. Wang, J. Chen, M. Jing, Y. Xu, X. Zheng, H. Dai. Brønsted Acid-Catalyzed Synthesis of 1,2,5-Trisubstituted Imidazoles via a Multicomponent Reaction of Vinyl Azides with Aromatic Aldehydes and Aromatic Amines. *J. Org. Chem.* **2022**, *87*, 13945–13954.

## 5. Analytical data of products

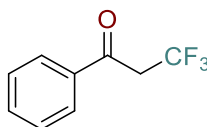

### 3,3,3-trifluoro-1-phenylpropan-1-one

**4a:** 31 mg, white solid, 83% yield.

**<sup>1</sup>H NMR** (400 MHz, CDCl<sub>3</sub>) δ 7.97 – 7.89 (m, 2H), 7.68 – 7.61 (m, 1H), 7.51 (t, *J* = 7.8 Hz, 2H), 3.80 (q, *J* = 10.0 Hz, 2H).

**<sup>13</sup>C NMR** (125 MHz, CDCl<sub>3</sub>) δ 189.7 (q, *J*<sub>CF</sub> = 2.5 Hz), 135.8 (q, *J*<sub>CF</sub> = 1.8 Hz), 134.2, 129.0, 128.4, 124.0 (q, *J*<sub>CF</sub> = 276.9 Hz), 42.1 (q, *J*<sub>CF</sub> = 28.2 Hz).

**<sup>19</sup>F NMR** (470 MHz, CDCl<sub>3</sub>) δ -62.04.

**HRMS-ESI:** calcd. For C<sub>9</sub>H<sub>7</sub>F<sub>3</sub>O [M+H]<sup>+</sup>: 189.0522; found: 189.0521.

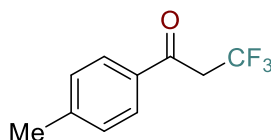

### 3,3,3-trifluoro-1-(p-tolyl)propan-1-one

**4b:** 32 mg, white solid, 79% yield.

**<sup>1</sup>H NMR** (400 MHz, CDCl<sub>3</sub>) δ 7.83 (d, *J* = 8.1 Hz, 2H), 7.30 (d, *J* = 7.9 Hz, 2H), 3.77 (q, *J* = 10.0 Hz, 2H), 2.43 (s, 3H).

**<sup>13</sup>C NMR** (101 MHz, CDCl<sub>3</sub>) δ 189.4 (q, *J*<sub>CF</sub> = 3.0 Hz), 145.4, 133.4 (q, *J*<sub>CF</sub> = 1.9 Hz), 129.6, 128.5, 124.1 (q, *J*<sub>CF</sub> = 277.8 Hz), 42.0 (q, *J*<sub>CF</sub> = 28.0 Hz), 21.7.

**<sup>19</sup>F NMR** (471 MHz, CDCl<sub>3</sub>) δ -61.99.

**HRMS-ESI:** calcd. For C<sub>10</sub>H<sub>9</sub>F<sub>3</sub>O [M+H]<sup>+</sup>: 203.0678; found: 203.0679.

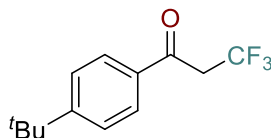

### 1-(4-(tert-butyl)phenyl)-3,3,3-trifluoropropan-1-one

**4c:** 40 mg, white solid, 82% yield.

**<sup>1</sup>H NMR** (400 MHz, CDCl<sub>3</sub>) δ 7.87 (d, *J* = 8.4 Hz, 2H), 7.51 (d, *J* = 8.2 Hz, 2H), 3.77 (q, *J* = 10.0 Hz, 2H), 1.34 (s, 9H).

**<sup>13</sup>C NMR** (100 MHz, CDCl<sub>3</sub>) δ 189.3 (q, *J*<sub>CF</sub> = 2.5 Hz), 158.2, 133.3 (q, *J*<sub>CF</sub> = 2.1 Hz), 128.4, 125.9, 124.1 (q, *J*<sub>CF</sub> = 275.8 Hz), 42.0 (q, *J*<sub>CF</sub> = 27.3 Hz), 35.3, 31.0.

**<sup>19</sup>F NMR** (470 MHz, CDCl<sub>3</sub>) δ -61.96.

**HRMS-ESI:** calcd. For C<sub>13</sub>H<sub>15</sub>F<sub>3</sub>O [M+H]<sup>+</sup>: 245.1148; found: 245.1150.

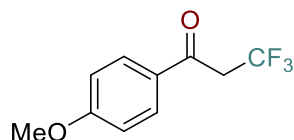

### 3,3,3-trifluoro-1-(4-methoxyphenyl)propan-1-one

**4d:** 34 mg, white solid, 78% yield.

**<sup>1</sup>H NMR** (400 MHz, CDCl<sub>3</sub>) δ 7.91 (d, *J* = 9.0 Hz, 2H), 6.97 (d, *J* = 9.0 Hz, 2H), 3.89 (s, 3H), 3.74 (q, *J* = 10.1 Hz, 2H).

**<sup>13</sup>C NMR** (100 MHz, CDCl<sub>3</sub>) δ 188.2 (q, *J*<sub>CF</sub> = 3.1 Hz), 164.4, 130.8, 129.0 (q, *J*<sub>CF</sub> = 2.2 Hz), 124.1 (q, *J*<sub>CF</sub> = 2.7 Hz), 55.6, 41.8 (q, *J*<sub>CF</sub> = 28.3 Hz).

**<sup>19</sup>F NMR** (470 MHz, CDCl<sub>3</sub>) δ -61.94.

**HRMS-ESI:** calcd. For C<sub>10</sub>H<sub>9</sub>F<sub>3</sub>O<sub>2</sub> [M+H]<sup>+</sup>: 219.0627; found: 219.0627.

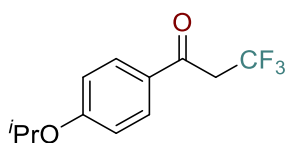

### 3,3,3-trifluoro-1-(4-isopropoxyphenyl)propan-1-one

**4e:** 39 mg, white solid, 79% yield.

**<sup>1</sup>H NMR** (400 MHz, CDCl<sub>3</sub>) δ 7.88 (d, *J* = 8.9 Hz, 2H), 6.92 (d, *J* = 8.9 Hz, 2H), 4.69 – 4.63 (m, 1H), 3.72 (q, *J* = 10.1 Hz, 2H), 1.37 (s, 3H), 1.35 (s, 3H).

**<sup>13</sup>C NMR** (100 MHz, CDCl<sub>3</sub>) δ 188.1 (q, *J*<sub>CF</sub> = 3.0 Hz), 162.9, 130.9, 128.4 (q, *J*<sub>CF</sub> = 1.7 Hz), 124.2 (q, *J*<sub>CF</sub> = 277.8 Hz), 115.4, 70.4, 41.7 (q, *J*<sub>CF</sub> = 28.2 Hz), 21.9, 21.8.

**<sup>19</sup>F NMR** (470 MHz, CDCl<sub>3</sub>) δ -61.93.

**HRMS-ESI:** calcd. For C<sub>12</sub>H<sub>13</sub>F<sub>3</sub>O<sub>2</sub> [M+H]<sup>+</sup>: 247.0940; found: 247.0943.

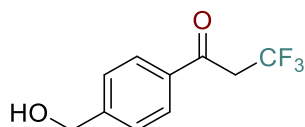

### 3,3,3-trifluoro-1-(4-(hydroxymethyl)phenyl)propan-1-one

**4f:** 33 mg, white solid, 75% yield.

**<sup>1</sup>H NMR** (400 MHz, CDCl<sub>3</sub>) δ 8.18 (s, 1H), 7.95 (d, *J* = 8.3 Hz, 2H), 7.51 (d, *J* = 8.2 Hz, 2H), 5.28 (s, 2H), 3.80 (q, *J* = 9.9 Hz, 2H).

**<sup>13</sup>C NMR** (100 MHz, CDCl<sub>3</sub>) δ 189.2 (q, *J*<sub>CF</sub> = 2.5 Hz), 141.6, 135.6 (q, *J*<sub>CF</sub> = 1.8 Hz), 128.7, 128.2, 123.9 (q, *J*<sub>CF</sub> = 276.3 Hz), 64.6, 42.2 (q, *J*<sub>CF</sub> = 28.2 Hz).

**<sup>19</sup>F NMR** (470 MHz, CDCl<sub>3</sub>) δ -61.93.

**HRMS-ESI:** calcd. For C<sub>10</sub>H<sub>9</sub>F<sub>3</sub>O<sub>2</sub> [M+H]<sup>+</sup>: 219.0627; found: 219.0625.

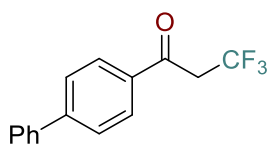

### 1-([1,1'-biphenyl]-4-yl)-3,3,3-trifluoropropan-1-one

**4g:** 42 mg, white solid, 79% yield.

**<sup>1</sup>H NMR** (400 MHz, CDCl<sub>3</sub>) δ 8.05 – 7.97 (m, 2H), 7.76 – 7.71 (m, 2H), 7.67 – 7.62 (m, 2H), 7.53 – 7.47 (m, 2H), 7.46 – 7.40 (m, 1H), 3.84 (q, *J* = 10.0 Hz, 2H).

**<sup>13</sup>C NMR** (100 MHz, CDCl<sub>3</sub>) δ 189.3 (q, *J*<sub>CF</sub> = 2.7 Hz), 146.9, 139.4, 134.5 (q, *J*<sub>CF</sub> = 1.6 Hz), 129.1, 129.0, 128.6, 127.6, 127.3, 124.1 (q, *J*<sub>CF</sub> = 275.2 Hz), 42.2 (q, *J*<sub>CF</sub> = 28.1 Hz).

**<sup>19</sup>F NMR** (470 MHz, CDCl<sub>3</sub>) δ -61.93.

**HRMS-ESI:** calcd. For C<sub>15</sub>H<sub>11</sub>F<sub>3</sub>O [M+H]<sup>+</sup>: 265.0835; found: 265.0837.

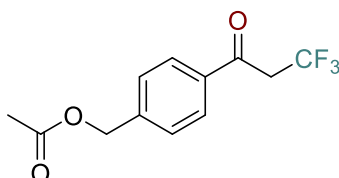

#### **4-(3,3,3-trifluoropropanoyl)benzyl acetate**

**4h:** 46 mg, white solid, 89% yield.

**<sup>1</sup>H NMR** (400 MHz, CDCl<sub>3</sub>) δ 7.93 (d, *J* = 8.1 Hz, 2H), 7.48 (d, *J* = 8.0 Hz, 2H), 5.17 (s, 2H), 3.79 (q, *J* = 10.0 Hz, 2H), 2.14 (s, 3H).

**<sup>13</sup>C NMR** (100 MHz, CDCl<sub>3</sub>) δ 189.2 (q, *J*<sub>CF</sub> = 3.0 Hz), 170.7, 142.5, 135.4 (q, *J*<sub>CF</sub> = 2.1 Hz), 128.7, 128.1, 123.9 (q, *J*<sub>CF</sub> = 275.0 Hz), 65.2, 42.2 (q, *J*<sub>CF</sub> = 28.0 Hz), 20.9.

**<sup>19</sup>F NMR** (470 MHz, CDCl<sub>3</sub>) δ -61.98.

**HRMS-ESI:** calcd. For C<sub>12</sub>H<sub>11</sub>F<sub>3</sub>O<sub>3</sub> [M+H]<sup>+</sup>: 261.0733; found: 261.0731.

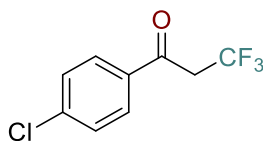

#### **1-(4-chlorophenyl)-3,3,3-trifluoropropan-1-one**

**4i:** 36 mg, white solid, 80% yield.

**<sup>1</sup>H NMR** (400 MHz, CDCl<sub>3</sub>) δ 7.92 – 7.83 (m, 2H), 7.53 – 7.45 (m, 2H), 3.77 (q, *J* = 9.9 Hz, 2H).

**<sup>13</sup>C NMR** (100 MHz, CDCl<sub>3</sub>) δ 188.6 (q, *J*<sub>CF</sub> = 3.0 Hz), 140.9, 134.1 (q, *J*<sub>CF</sub> = 2.0 Hz), 129.8, 129.3, 123.9 (q, *J*<sub>CF</sub> = 275.0 Hz), 42.2 (q, *J*<sub>CF</sub> = 28.0 Hz).

**<sup>19</sup>F NMR** (470 MHz, CDCl<sub>3</sub>) δ -61.98.

**HRMS-ESI:** calcd. For C<sub>9</sub>H<sub>6</sub>ClF<sub>3</sub>O [M+H]<sup>+</sup>: 223.0132; found: 223.0130.

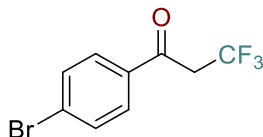

#### **1-(4-bromophenyl)-3,3,3-trifluoropropan-1-one**

**4j:** 44 mg, white solid, 82% yield.

**<sup>1</sup>H NMR** (400 MHz, CDCl<sub>3</sub>) δ 7.79 (d, *J* = 8.5 Hz, 2H), 7.65 (d, *J* = 8.5 Hz, 2H), 3.77 (q, *J* = 9.9 Hz, 2H).

**<sup>13</sup>C NMR** (100 MHz, CDCl<sub>3</sub>) δ 188.8 (q, *J*<sub>CF</sub> = 3.0 Hz), 134.5 (q, *J*<sub>CF</sub> = 1.8 Hz), 132.3, 129.8, 129.7, 123.8 (q, *J*<sub>CF</sub> = 277.7 Hz), 42.1 (q, *J*<sub>CF</sub> = 28.3 Hz).

<sup>19</sup>F NMR (470 MHz, CDCl<sub>3</sub>) δ -61.98.

HRMS-ESI: calcd. For C<sub>9</sub>H<sub>6</sub>BrF<sub>3</sub>O [M+H]<sup>+</sup>: 266.9627; found: 266.9628.

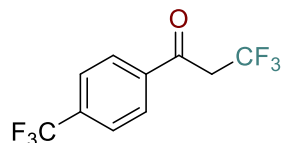

#### 3,3,3-trifluoro-1-(4-(trifluoromethyl)phenyl)propan-1-one

**4k**: 38 mg, white solid, 75% yield.

<sup>1</sup>H NMR (400 MHz, CDCl<sub>3</sub>) δ 8.05 (d, *J* = 8.1 Hz, 2H), 7.79 (d, *J* = 8.0 Hz, 2H), 3.83 (q, *J* = 9.8 Hz, 2H).

<sup>13</sup>C NMR (100 MHz, CDCl<sub>3</sub>) δ 188.9 (q, *J*<sub>CF</sub> = 2.7 Hz), 138.3, 135.5 (q, *J*<sub>CF</sub> = 32.3 Hz), 128.8, 126.1 (q, *J*<sub>CF</sub> = 4.0 Hz), 123.7 (q, *J*<sub>CF</sub> = 278.7 Hz), 123.3 (q, *J*<sub>CF</sub> = 273.7 Hz), 42.5 (q, *J*<sub>CF</sub> = 29.3 Hz).

<sup>19</sup>F NMR (470 MHz, CDCl<sub>3</sub>) δ -61.97, -63.31.

HRMS-ESI: calcd. For C<sub>10</sub>H<sub>6</sub>F<sub>6</sub>O [M+H]<sup>+</sup>: 257.0396; found: 257.0395.

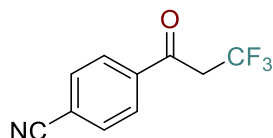

#### 4-(3,3,3-trifluoropropanoyl)benzonitrile

**4l**: 35 mg, white solid, 81% yield.

<sup>1</sup>H NMR (400 MHz, CDCl<sub>3</sub>) δ 8.04 (d, *J* = 8.8 Hz, 2H), 7.83 (d, *J* = 7.5 Hz, 2H), 3.83 (q, *J* = 9.7 Hz, 2H).

<sup>13</sup>C NMR (100 MHz, CDCl<sub>3</sub>) δ 188.6 (q, *J*<sub>CF</sub> = 3.3 Hz), 138.5 (q, *J*<sub>CF</sub> = 1.9 Hz), 132.8, 129.4, 128.8, 123.6 (q, *J*<sub>CF</sub> = 275.3 Hz), 117.5, 42.5 (q, *J*<sub>CF</sub> = 29.1 Hz).

<sup>19</sup>F NMR (470 MHz, CDCl<sub>3</sub>) δ -61.94.

HRMS-ESI: calcd. For C<sub>10</sub>H<sub>6</sub>F<sub>3</sub>NO [M+H]<sup>+</sup>: 214.0474; found: 214.0470.

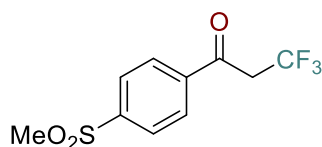

#### 3,3,3-trifluoro-1-(4-(methylsulfonyl)phenyl)propan-1-one

**4m**: 44 mg, white solid, 83% yield.

<sup>1</sup>H NMR (400 MHz, CDCl<sub>3</sub>) δ 8.11 (d, *J* = 8.1 Hz, 2H), 8.08 (d, *J* = 8.7 Hz, 2H), 3.85 (q, *J* = 9.8 Hz, 2H), 3.09 (s, 3H).

<sup>13</sup>C NMR (100 MHz, CDCl<sub>3</sub>) δ 188.7 (q, *J*<sub>CF</sub> = 3.1 Hz), 145.2, 139.5, 139.5 (q, *J*<sub>CF</sub> = 1.7 Hz), 129.3, 128.2, 123.6 (q, *J*<sub>CF</sub> = 277.8 Hz), 44.3, 42.6 (q, *J*<sub>CF</sub> = 28.3 Hz).

<sup>19</sup>F NMR (470 MHz, CDCl<sub>3</sub>) δ -61.92.

HRMS-ESI: calcd. For C<sub>10</sub>H<sub>9</sub>F<sub>3</sub>O<sub>3</sub>S [M+H]<sup>+</sup>: 267.0297; found: 267.0298.

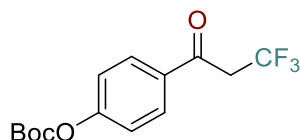

**tert-butyl (4-(3,3,3-trifluoropropanoyl)phenyl) carbonate**

**4n:** 49 mg, white solid, 81% yield.

**<sup>1</sup>H NMR** (400 MHz, CDCl<sub>3</sub>) δ 7.96 (d, *J* = 8.6 Hz, 2H), 7.32 (d, *J* = 8.8 Hz, 2H), 3.77 (q, *J* = 9.9 Hz, 2H), 1.57 (s, 9H).

**<sup>13</sup>C NMR** (100 MHz, CDCl<sub>3</sub>) δ 188.5 (q, *J*<sub>CF</sub> = 2.7 Hz), 155.5, 150.8, 133.1 (q, *J*<sub>CF</sub> = 2.1 Hz), 130.1, 123.9 (q, *J*<sub>CF</sub> = 278.8 Hz), 121.7, 84.5, 42.1 (q, *J*<sub>CF</sub> = 28.0 Hz), 27.7.

**<sup>19</sup>F NMR** (470 MHz, CDCl<sub>3</sub>) δ -61.99.

**HRMS-ESI:** calcd. For C<sub>14</sub>H<sub>15</sub>F<sub>3</sub>O<sub>4</sub> [M+H]<sup>+</sup>: 305.0995; found: 305.0997.

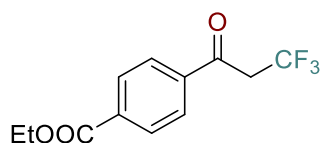

**ethyl 4-(3,3,3-trifluoropropanoyl)benzoate**

**4o:** 41 mg, white solid, 79% yield.

**<sup>1</sup>H NMR** (400 MHz, CDCl<sub>3</sub>) δ 8.17 (d, *J* = 8.4 Hz, 2H), 7.99 (d, *J* = 8.1 Hz, 2H), 4.42 (q, *J* = 7.1 Hz, 2H), 3.84 (q, *J* = 9.8 Hz, 2H), 1.42 (t, *J* = 7.1 Hz, 3H).

**<sup>13</sup>C NMR** (100 MHz, CDCl<sub>3</sub>) δ 189.3 (q, *J*<sub>CF</sub> = 3.2 Hz), 165.4, 138.7 (q, *J*<sub>CF</sub> = 1.7 Hz), 135.3, 130.1, 128.3, 123.8 (q, *J*<sub>CF</sub> = 278.7 Hz), 61.7, 42.5 (q, *J*<sub>CF</sub> = 29.3 Hz), 14.3.

**<sup>19</sup>F NMR** (470 MHz, CDCl<sub>3</sub>) δ -62.01.

**HRMS-ESI:** calcd. For C<sub>12</sub>H<sub>11</sub>F<sub>3</sub>O<sub>3</sub> [M+H]<sup>+</sup>: 261.0733; found: 261.0730.

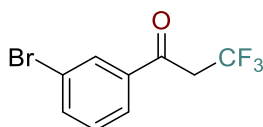

**1-(3-bromophenyl)-3,3,3-trifluoropropan-1-one**

**4p:** 43 mg, white solid, 80% yield.

**<sup>1</sup>H NMR** (400 MHz, CDCl<sub>3</sub>) δ 8.06 (s, 1H), 7.85 (dt, *J* = 7.9, 1.4 Hz, 1H), 7.77 (ddd, *J* = 8.0, 2.0, 1.0 Hz, 1H), 7.40 (t, *J* = 7.9 Hz, 1H), 3.78 (q, *J* = 9.8 Hz, 2H).

**<sup>13</sup>C NMR** (100 MHz, CDCl<sub>3</sub>) δ 188.5 (q, *J*<sub>CF</sub> = 3.0 Hz), 137.4 (q, *J*<sub>CF</sub> = 2.0 Hz), 137.1, 131.4, 130.5, 126.9, 123.3, 123.8 (q, *J*<sub>CF</sub> = 278.8 Hz), 42.2 (q, *J*<sub>CF</sub> = 28.3 Hz).

**<sup>19</sup>F NMR** (470 MHz, CDCl<sub>3</sub>) δ -62.01.

**HRMS-ESI:** calcd. For C<sub>9</sub>H<sub>6</sub>BrF<sub>3</sub>O [M+H]<sup>+</sup>: 266.9627; found: 266.9626.

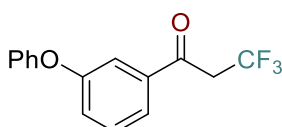

**3,3,3-trifluoro-1-(3-phenoxyphenyl)propan-1-one**

**4q:** 42 mg, white solid, 75% yield.

**<sup>1</sup>H NMR** (400 MHz, CDCl<sub>3</sub>) δ 7.63 (d, *J* = 7.7 Hz, 1H), 7.55 (t, *J* = 2.1 Hz, 1H), 7.47 (t, *J* = 8.0 Hz, 1H), 7.38 (t, *J* = 8.0 Hz, 2H), 7.29 – 7.25 (m, 1H), 7.18 (t, *J* = 7.4 Hz, 1H), 7.03 (d, *J* = 7.8 Hz, 2H), 3.76 (q, *J* = 9.9 Hz, 2H).

**<sup>13</sup>C NMR** (100 MHz, CDCl<sub>3</sub>) δ 189.2 (q, *J*<sub>CF</sub> = 3.1 Hz), 158.2, 156.2, 137.4 (q, *J*<sub>CF</sub> = 1.3 Hz), 130.4, 130.1, 123.9 (q, *J*<sub>CF</sub> = 276.1 Hz), 124.3, 124.2, 122.9, 119.4, 117.5, 42.3 (q, *J*<sub>CF</sub> = 28.3 Hz).

**<sup>19</sup>F NMR** (470 MHz, CDCl<sub>3</sub>) δ -61.94.

**HRMS-ESI:** calcd. For C<sub>15</sub>H<sub>11</sub>F<sub>3</sub>O<sub>2</sub> [M+H]<sup>+</sup>: 281.0784; found: 281.0786.

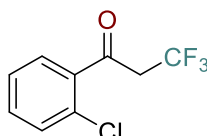

#### **1-(2-chlorophenyl)-3,3,3-trifluoropropan-1-one**

**4r:** 3.1 mg, light yellow oil, 7% yield.

**<sup>1</sup>H NMR** (400 MHz, CDCl<sub>3</sub>) δ 7.54 (dd, *J* = 7.5, 1.6 Hz, 1H), 7.45 (d, *J* = 1.9 Hz, 1H), 7.42 – 7.39 (m, 1H), 7.37 (dd, *J* = 4.9, 3.2 Hz, 1H), 3.86 (q, *J* = 10.0 Hz, 2H).

**<sup>19</sup>F NMR** (470 MHz, CDCl<sub>3</sub>) δ -62.19.

**HRMS-ESI:** calcd. For C<sub>9</sub>H<sub>6</sub>ClF<sub>3</sub>O [M+H]<sup>+</sup>: 223.0132; found: 223.0130.

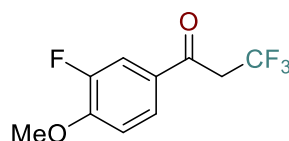

#### **3,3,3-trifluoro-1-(3-fluoro-4-methoxyphenyl)propan-1-one**

**4s:** 36 mg, white solid, 76% yield.

**<sup>1</sup>H NMR** (400 MHz, CDCl<sub>3</sub>) δ 7.79 – 7.59 (m, 2H), 7.02 (t, *J* = 8.3 Hz, 1H), 3.96 (s, 3H), 3.73 (q, *J* = 10.0 Hz, 2H).

**<sup>13</sup>C NMR** (100 MHz, CDCl<sub>3</sub>) δ 187.5 (dq, *J*<sub>CF</sub> = 2.0, 2.2 Hz), 152.1 (d, *J*<sub>CF</sub> = 250.5 Hz), 152.9 (d, *J*<sub>CF</sub> = 11.1 Hz), 129.0 (d, *J*<sub>CF</sub> = 4.1, 2.1 Hz), 126.0 (d, *J*<sub>CF</sub> = 3.4 Hz), 123.9 (q, *J*<sub>CF</sub> = 277.7 Hz), 115.9 (d, *J*<sub>CF</sub> = 19.2 Hz), 112.5, 56.3, 41.8 (q, *J*<sub>CF</sub> = 28.3 Hz).

**<sup>19</sup>F NMR** (470 MHz, CDCl<sub>3</sub>) δ -61.96, -133.18.

**HRMS-ESI:** calcd. For C<sub>10</sub>H<sub>8</sub>F<sub>4</sub>O [M+H]<sup>+</sup>: 237.0533; found: 237.0534.

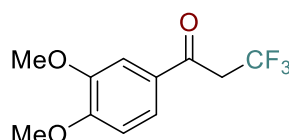

#### **1-(3,4-dimethoxyphenyl)-3,3,3-trifluoropropan-1-one**

**4t:** 37 mg, white solid, 74% yield.

**<sup>1</sup>H NMR** (400 MHz, CDCl<sub>3</sub>) δ 7.59 – 7.45 (m, 2H), 6.91 (d, *J* = 8.2 Hz, 1H), 3.96 (s, 3H), 3.93 (s, 3H), 3.75 (q, *J* = 10.1 Hz, 2H).

**<sup>13</sup>C NMR** (101 MHz, CDCl<sub>3</sub>) δ 188.2 (q, *J*<sub>CF</sub> = 2.2 Hz), 154.3, 149.4, 129.1 (q, *J*<sub>CF</sub> = 1.3 Hz), 124.1 (q, *J*<sub>CF</sub> = 275.1 Hz), 123.5, 110.1, 110.0, 56.2, 56.0, 41.7 (q, *J*<sub>CF</sub> = 28.2 Hz).

$^{19}\text{F}$  NMR (471 MHz,  $\text{CDCl}_3$ )  $\delta$  -61.93.

HRMS-ESI: calcd. For  $\text{C}_{11}\text{H}_{11}\text{F}_3\text{O}_3$   $[\text{M}+\text{H}]^+$ : 249.0733; found: 249.0735.

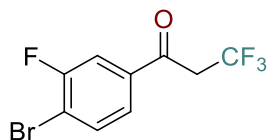

#### 1-(4-bromo-3-fluorophenyl)-3,3,3-trifluoropropan-1-one

**4u**: 45 mg, white solid, 79% yield.

$^1\text{H}$  NMR (400 MHz,  $\text{CDCl}_3$ )  $\delta$  7.78 – 7.71 (m, 1H), 7.68 (dd,  $J$  = 8.9, 2.0 Hz, 1H), 7.58 (dd,  $J$  = 8.3, 2.0 Hz, 1H), 3.76 (q,  $J$  = 9.8 Hz, 2H).

$^{13}\text{C}$  NMR (101 MHz,  $\text{CDCl}_3$ )  $\delta$  187.8 (dq,  $J_{\text{CF}}$  = 2.0, 2.0 Hz), 159.4 (q,  $J_{\text{CF}}$  = 251.5 Hz), 136.6 (dq,  $J_{\text{CF}}$  = 6.0, 2.0 Hz), 134.4, 124.9 (d,  $J_{\text{CF}}$  = 4.0 Hz), 123.6 (q,  $J_{\text{CF}}$  = 275.0 Hz), 116.6 (d,  $J_{\text{CF}}$  = 22.0 Hz), 116.0 (d,  $J_{\text{CF}}$  = 23.0 Hz), 42.3 (q,  $J_{\text{CF}}$  = 29.0 Hz).

$^{19}\text{F}$  NMR (471 MHz,  $\text{CDCl}_3$ )  $\delta$  -61.98, -104.47.

HRMS-ESI: calcd. For  $\text{C}_9\text{H}_5\text{BrF}_4\text{O}$   $[\text{M}+\text{H}]^+$ : 284.9533; found: 284.9530.

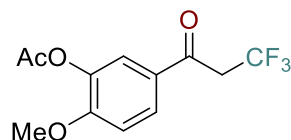

#### 2-methoxy-5-(3,3,3-trifluoropropanoyl)phenyl acetate

**4v**: 39 mg, white solid, 70% yield.

$^1\text{H}$  NMR (400 MHz,  $\text{CDCl}_3$ )  $\delta$  7.59 (d,  $J$  = 2.0 Hz, 1H), 7.47 (dd,  $J$  = 8.2, 2.0 Hz, 1H), 7.16 (d,  $J$  = 8.2 Hz, 1H), 3.89 (s, 3H), 3.78 (q,  $J$  = 9.9 Hz, 2H), 2.34 (s, 3H).

$^{13}\text{C}$  NMR (101 MHz,  $\text{CDCl}_3$ )  $\delta$  188.6 (q,  $J_{\text{CF}}$  = 2.3 Hz), 168.4, 151.8, 144.8, 134.5 (q,  $J_{\text{CF}}$  = 1.2 Hz), 123.9 (q,  $J_{\text{CF}}$  = 275.0 Hz), 123.1, 121.8, 111.6, 56.1, 42.1 (q,  $J_{\text{CF}}$  = 29.1 Hz), 20.7.

$^{19}\text{F}$  NMR (471 MHz,  $\text{CDCl}_3$ )  $\delta$  -62.01.

HRMS-ESI: calcd. For  $\text{C}_{12}\text{H}_{11}\text{F}_3\text{O}_4$   $[\text{M}+\text{H}]^+$ : 277.0682; found: 277.0680.

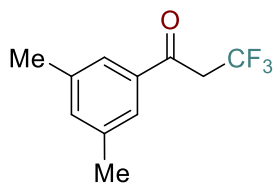

#### 1-(3,5-dimethylphenyl)-3,3,3-trifluoropropan-1-one

**4w**: 32 mg, white solid, 73% yield.

$^1\text{H}$  NMR (400 MHz,  $\text{CDCl}_3$ )  $\delta$  7.53 (s, 2H), 7.26 (s, 1H), 3.77 (q,  $J$  = 10.0 Hz, 2H), 2.38 (s, 6H).

$^{13}\text{C}$  NMR (101 MHz,  $\text{CDCl}_3$ )  $\delta$  190.1 (q,  $J_{\text{CF}}$  = 2.0 Hz), 138.7, 135.9, 126.7, 126.1, 124.1 (q,  $J_{\text{CF}}$  = 277.8 Hz), 42.1 (q,  $J_{\text{CF}}$  = 28.0 Hz), 21.2.

$^{19}\text{F}$  NMR (471 MHz,  $\text{CDCl}_3$ )  $\delta$  -62.05.

HRMS-ESI: calcd. For  $\text{C}_{11}\text{H}_{11}\text{F}_3\text{O}$   $[\text{M}+\text{H}]^+$ : 217.0835; found: 217.0833.

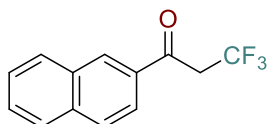

### 3,3,3-trifluoro-1-(naphthalen-2-yl)propan-1-one

**4x:** 39 mg, white solid, 82% yield.

**<sup>1</sup>H NMR** (400 MHz, CDCl<sub>3</sub>) δ 8.41 (d, *J* = 1.8 Hz, 1H), 8.02 – 7.95 (m, 2H), 7.90 (dd, *J* = 10.3, 8.2 Hz, 2H), 7.65 (ddd, *J* = 8.2, 6.9, 1.4 Hz, 1H), 7.59 (ddd, *J* = 8.1, 6.8, 1.4 Hz, 1H), 3.93 (q, *J* = 10.0 Hz, 2H).

**<sup>13</sup>C NMR** (101 MHz, CDCl<sub>3</sub>) δ 189.7 (q, *J*<sub>CF</sub> = 3.0 Hz), 136.0, 133.2 (q, *J*<sub>CF</sub> = 2.0 Hz), 132.3, 130.6, 129.7, 129.3, 129.0, 127.9, 127.2, 123.5, 124.1 (q, *J*<sub>CF</sub> = 277.8 Hz), 42.2 (q, *J*<sub>CF</sub> = 28.3 Hz).

**<sup>19</sup>F NMR** (471 MHz, CDCl<sub>3</sub>) δ -61.89.

**HRMS-ESI:** calcd. For C<sub>13</sub>H<sub>9</sub>F<sub>3</sub>O [M+H]<sup>+</sup>: 239.0678; found: 239.0680.

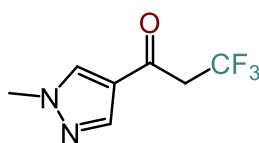

### 3,3,3-trifluoro-1-(1-methyl-1H-pyrazol-4-yl)propan-1-one

**4y:** 28 mg, white solid, 73% yield.

**<sup>1</sup>H NMR** (400 MHz, CDCl<sub>3</sub>) δ 7.93 (s, 1H), 7.90 (s, 1H), 3.96 (s, 3H), 3.52 (q, *J* = 10.3 Hz, 2H).

**<sup>13</sup>C NMR** (101 MHz, CDCl<sub>3</sub>) δ 183.1 (q, *J*<sub>CF</sub> = 3.3 Hz), 140.6, 133.2, 123.8 (q, *J*<sub>CF</sub> = 277.8 Hz), 123.5 (q, *J*<sub>CF</sub> = 2.1 Hz), 44.2 (q, *J*<sub>CF</sub> = 28.1 Hz), 39.5.

**<sup>19</sup>F NMR** (471 MHz, CDCl<sub>3</sub>) δ -61.93.

**HRMS-ESI:** calcd. For C<sub>7</sub>H<sub>7</sub>F<sub>3</sub>N<sub>2</sub>O [M+H]<sup>+</sup>: 193.0583; found: 193.0585.

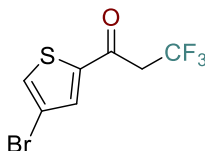

### 1-(4-bromothiophen-2-yl)-3,3,3-trifluoropropan-1-one

**4z:** 43 mg, white solid, 77% yield.

**<sup>1</sup>H NMR** (400 MHz, CDCl<sub>3</sub>) δ 7.64 (s, 1H), 7.62 (s, 1H), 3.69 (q, *J* = 9.9 Hz, 2H).

**<sup>13</sup>C NMR** (100 MHz, CDCl<sub>3</sub>) δ 181.3 (q, *J*<sub>CF</sub> = 3.0 Hz), 143.3 (q, *J*<sub>CF</sub> = 2.3 Hz), 135.4, 132.9, 123.4 (q, *J*<sub>CF</sub> = 276.1 Hz), 111.3, 42.9 (q, *J*<sub>CF</sub> = 29.3 Hz).

**<sup>19</sup>F NMR** (470 MHz, CDCl<sub>3</sub>) δ -61.88.

**HRMS-ESI:** calcd. For C<sub>7</sub>H<sub>4</sub>BrF<sub>3</sub>OS [M+H]<sup>+</sup>: 272.9191; found: 272.9193.

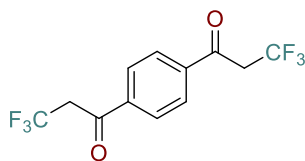

### 1,1'-(1,4-phenylene)bis(3,3,3-trifluoropropan-1-one)

**4A:** 43 mg, white solid, 72% yield.

**<sup>1</sup>H NMR** (400 MHz, DMSO-*d*<sub>6</sub>) δ 8.14 (s, 4H), 4.51 (q, *J* = 10.7 Hz, 4H).

$^{13}\text{C}$  NMR (100 MHz, DMSO)  $\delta$  191.5 (q,  $J_{\text{CF}} = 3.3$  Hz), 139.6 (q,  $J_{\text{CF}} = 1.5$  Hz), 129.1, 125.4 (q,  $J_{\text{CF}} = 276.7$  Hz), 42.5 (q,  $J_{\text{CF}} = 27.3$  Hz).

$^{19}\text{F}$  NMR (470 MHz,  $\text{CDCl}_3$ )  $\delta$  -56.32.

HRMS-ESI: calcd. For  $\text{C}_{12}\text{H}_8\text{F}_6\text{O}_2$   $[\text{M}+\text{H}]^+$ : 299.0501; found: 299.0504.

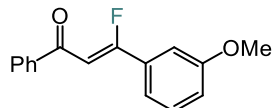

#### (Z)-3-fluoro-3-(3-methoxyphenyl)-1-phenylprop-2-en-1-one

7: 32 mg, white solid, 62% yield.

$^1\text{H}$  NMR (400 MHz,  $\text{CDCl}_3$ )  $\delta$  7.97 (dd,  $J = 7.2, 1.8$  Hz, 2H), 7.61 – 7.55 (m, 1H), 7.49 (dd,  $J = 8.3, 6.9$  Hz, 2H), 7.42 – 7.31 (m, 2H), 7.25 (t,  $J = 2.0$  Hz, 1H), 7.05 (ddd,  $J = 7.9, 2.6, 1.4$  Hz, 1H), 6.78 (d,  $J = 34.1$  Hz, 1H), 3.86 (s, 3H).

$^{13}\text{C}$  NMR (100 MHz,  $\text{CDCl}_3$ )  $\delta$  188.92, 165.1 (d,  $J_{\text{CF}} = 248.0$  Hz), 159.9 (d,  $J_{\text{CF}} = 2.0$  Hz), 138.60, 132.94, 132.2 (d,  $J_{\text{CF}} = 26.0$  Hz), 130.04, 128.60, 128.37, 118.3 (d,  $J_{\text{CF}} = 8.0$  Hz), 117.37, 111.2 (d,  $J_{\text{CF}} = 8.0$  Hz), 102.1 (d,  $J_{\text{CF}} = 7.0$  Hz), 55.50.

$^{19}\text{F}$  NMR (470 MHz,  $\text{CDCl}_3$ )  $\delta$  -96.08.

HRMS-ESI: calcd. For  $\text{C}_{16}\text{H}_{14}\text{FO}_2$   $[\text{M}+\text{H}]^+$ : 257.0972; found: 257.0968.

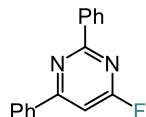

#### 4-fluoro-2,6-diphenylpyrimidine

9: 38 mg, white solid, 75% yield.

$^1\text{H}$  NMR (400 MHz,  $\text{CDCl}_3$ )  $\delta$  8.61 – 8.53 (m, 2H), 8.21 (dd,  $J = 6.7, 3.0$  Hz, 2H), 7.56 (dd,  $J = 5.0, 1.9$  Hz, 3H), 7.53 (dd,  $J = 5.2, 2.0$  Hz, 3H), 7.22 (s, 1H).

$^{13}\text{C}$  NMR (100 MHz,  $\text{CDCl}_3$ )  $\delta$  171.9 (d,  $J_{\text{CF}} = 248.0$  Hz), 168.7 (d,  $J_{\text{CF}} = 8.0$  Hz), 165.4 (d,  $J_{\text{CF}} = 13.0$  Hz), 136.43, 136.1 (d,  $J_{\text{CF}} = 5.0$  Hz), 131.5 (d,  $J_{\text{CF}} = 2.0$  Hz), 129.05, 128.65, 128.62, 127.41, 126.32, 99.6 (d,  $J_{\text{CF}} = 31.0$  Hz).

$^{19}\text{F}$  NMR (470 MHz,  $\text{CDCl}_3$ )  $\delta$  -61.19.

HRMS-ESI: calcd. For  $\text{C}_{16}\text{H}_{12}\text{FN}_2$   $[\text{M}+\text{H}]^+$ : 251.0979; found: 251.0982.

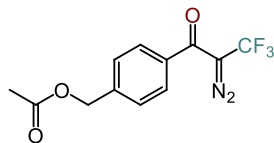

#### 4-(2-diazo-3,3,3-trifluoropropanoyl)benzyl acetate

10: 39 mg, light yellow oil, 68% yield.

$^1\text{H}$  NMR (400 MHz,  $\text{CDCl}_3$ )  $\delta$  7.64 (d,  $J = 8.1$  Hz, 2H), 7.45 (d,  $J = 8.1$  Hz, 2H), 5.16 (s, 2H), 2.13 (s, 3H).

$^{13}\text{C}$  NMR (100 MHz,  $\text{CDCl}_3$ )  $\delta$  183.9, 170.7, 141.1, 135.8, 128.1, 127.6, 123.0 (q,  $J_{\text{CF}} = 272.7$  Hz), 65.3, 20.9.

$^{19}\text{F}$  NMR (470 MHz,  $\text{CDCl}_3$ )  $\delta$  -56.01.

HRMS-ESI: calcd. For  $\text{C}_{12}\text{H}_9\text{F}_3\text{N}_2\text{O}_3$   $[\text{M}+\text{H}]^+$ : 287.0638; found: 287.0635.

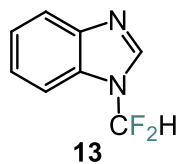

**$^1\text{H}$  NMR** (600 MHz,  $\text{CDCl}_3$ )  $\delta$  8.12 (s, 1H), 7.85 (dd,  $J = 6.0, 3.5$  Hz, 1H), 7.68 – 7.54 (m, 1H), 7.39 (dt,  $J = 7.6, 5.0$  Hz, 2H), 7.33 (t,  $J = 60.0$  Hz, 1H).

**$^{13}\text{C}$  NMR** (150 MHz,  $\text{CDCl}_3$ )  $\delta$  143.9, 139.1, 130.6, 124.8, 124.2, 121.0, 111.1, 109.0 (t,  $J_{\text{CF}} = 249.9$  Hz).

**$^{19}\text{F}$  NMR** (564 MHz,  $\text{CDCl}_3$ )  $\delta$  -93.67, -93.77.

## 6. NMR spectra of products

$^1\text{H}$  NMR (400 MHz,  $\text{CDCl}_3$ ),  $^{13}\text{C}$  NMR (125 MHz,  $\text{CDCl}_3$ ) and  $^{19}\text{F}$  NMR (470 MHz,  $\text{CDCl}_3$ ) spectra for 4a

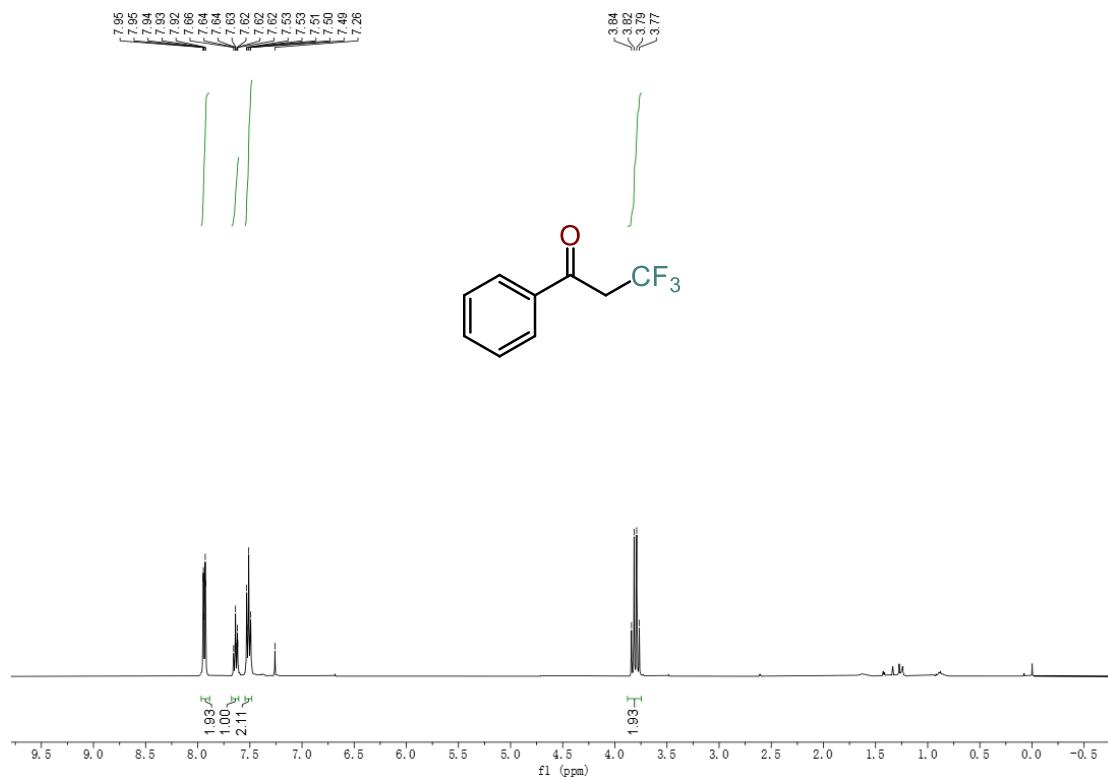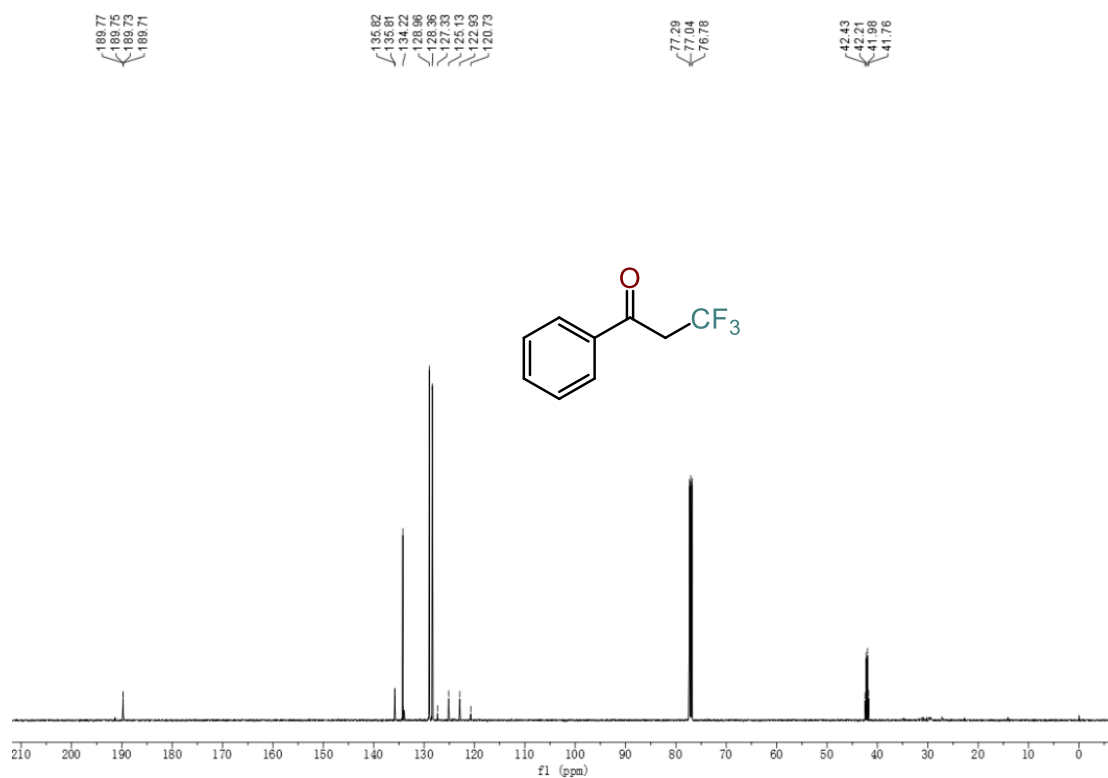

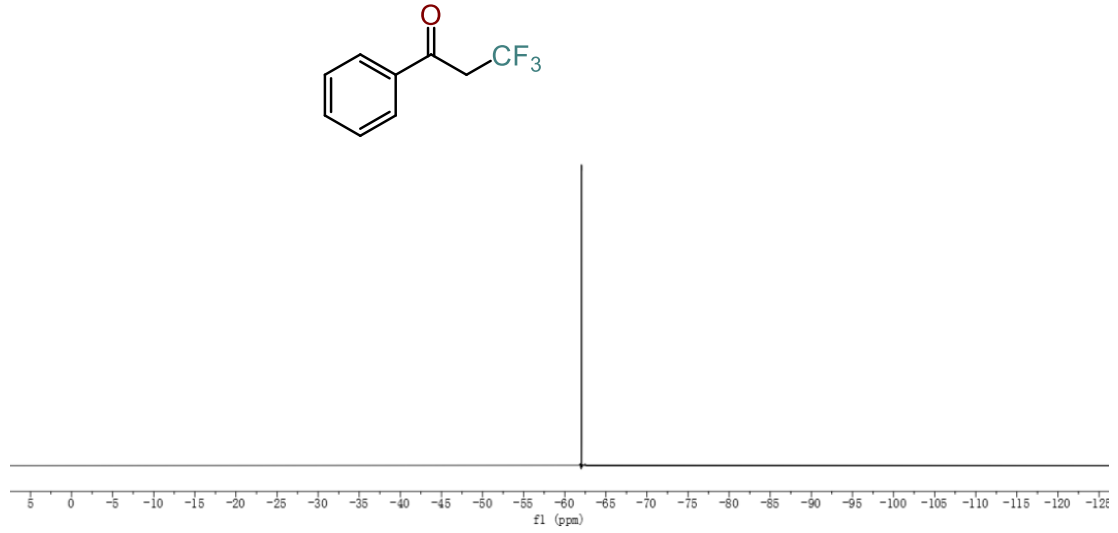

**$^1\text{H}$  NMR (400 MHz,  $\text{CDCl}_3$ ),  $^{13}\text{C}$  NMR (100 MHz,  $\text{CDCl}_3$ ) and  $^{19}\text{F}$  NMR (470 MHz,  $\text{CDCl}_3$ ) spectra for 4b**

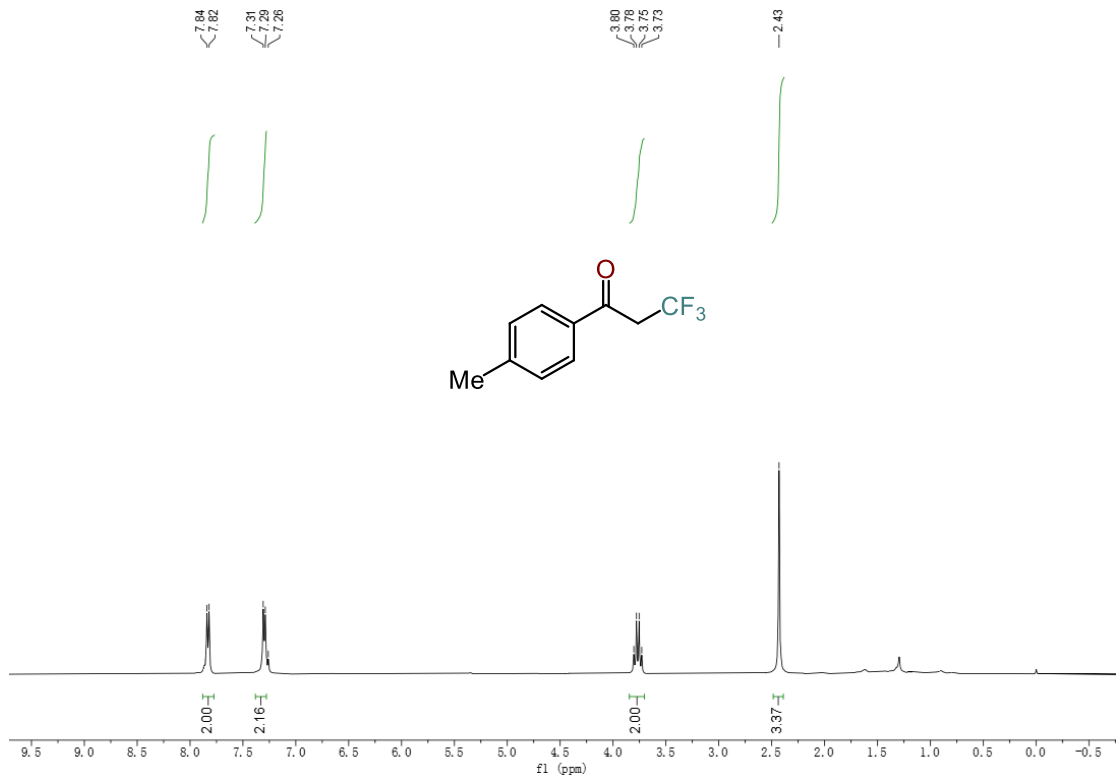

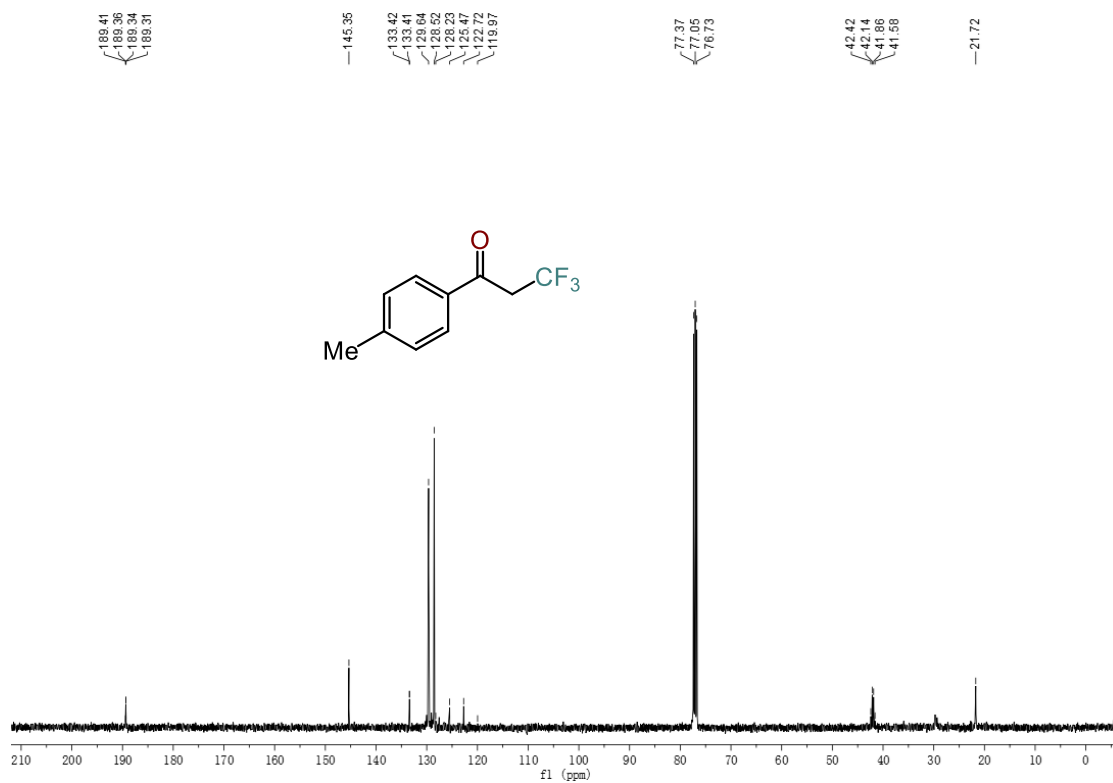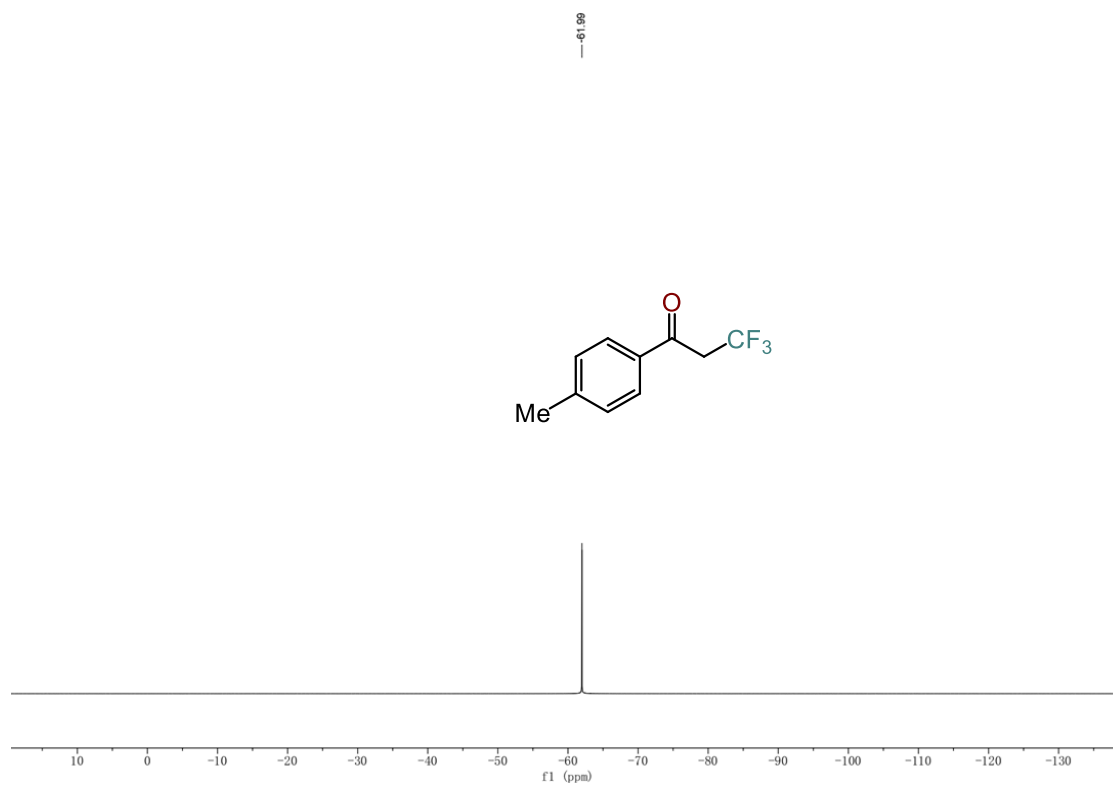

**<sup>1</sup>H NMR (400 MHz, CDCl<sub>3</sub>), <sup>13</sup>C NMR (100 MHz, CDCl<sub>3</sub>) and <sup>19</sup>F NMR (470 MHz, CDCl<sub>3</sub>) spectra for 4c**

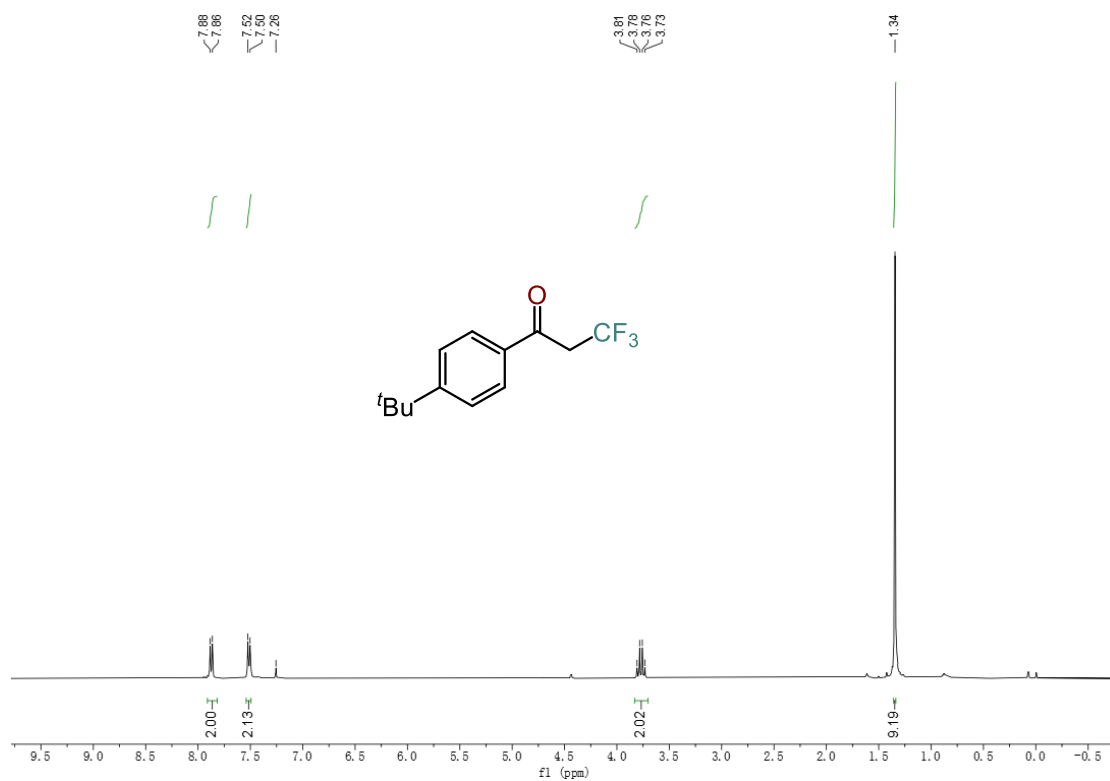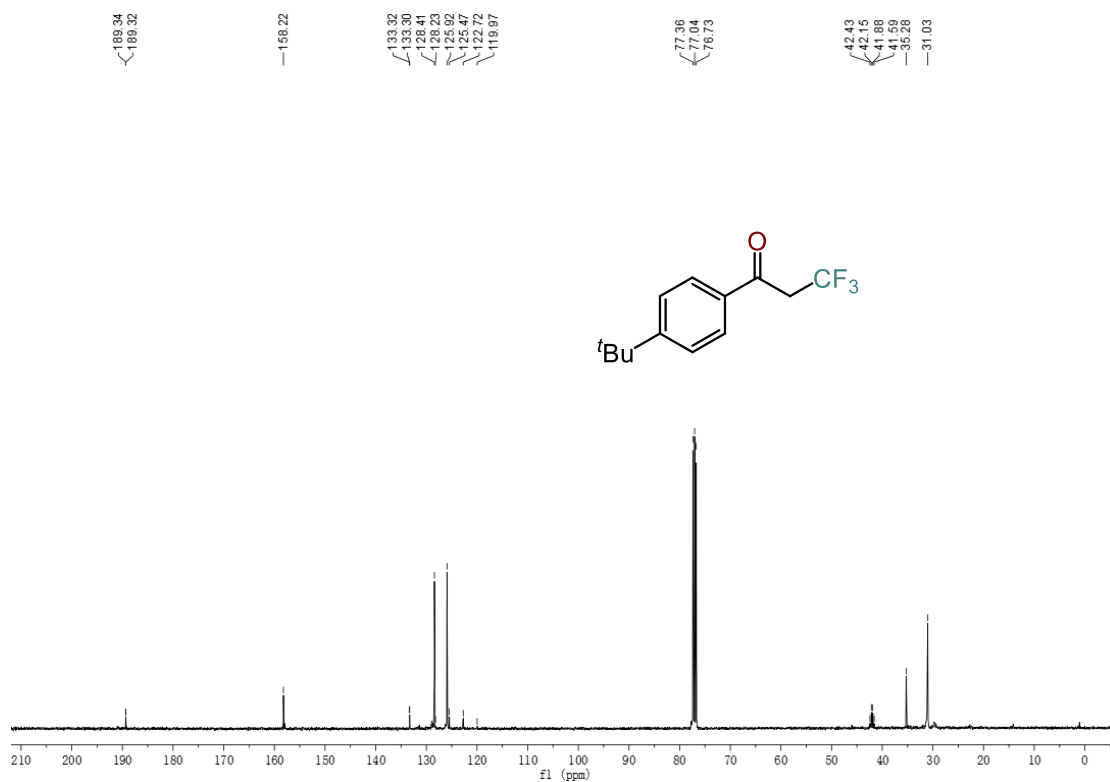

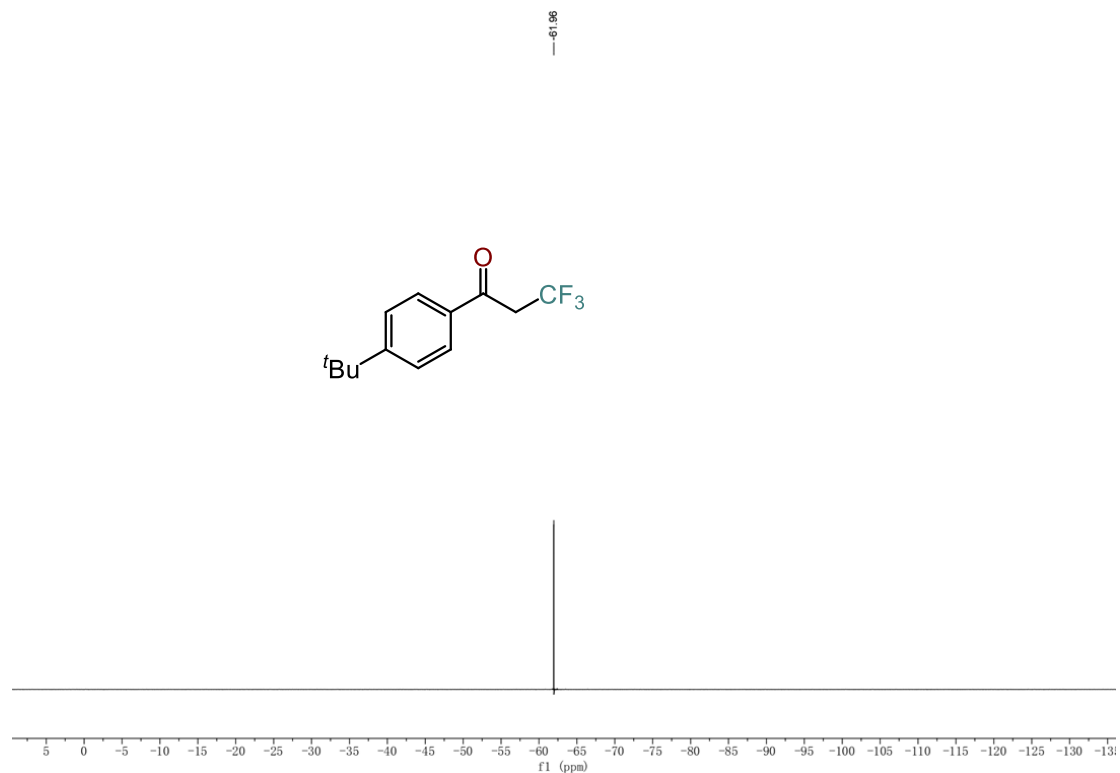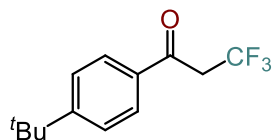

**<sup>1</sup>H NMR (400 MHz, CDCl<sub>3</sub>), <sup>13</sup>C NMR (100 MHz, CDCl<sub>3</sub>) and <sup>19</sup>F NMR (470 MHz, CDCl<sub>3</sub>) spectra for 4d**

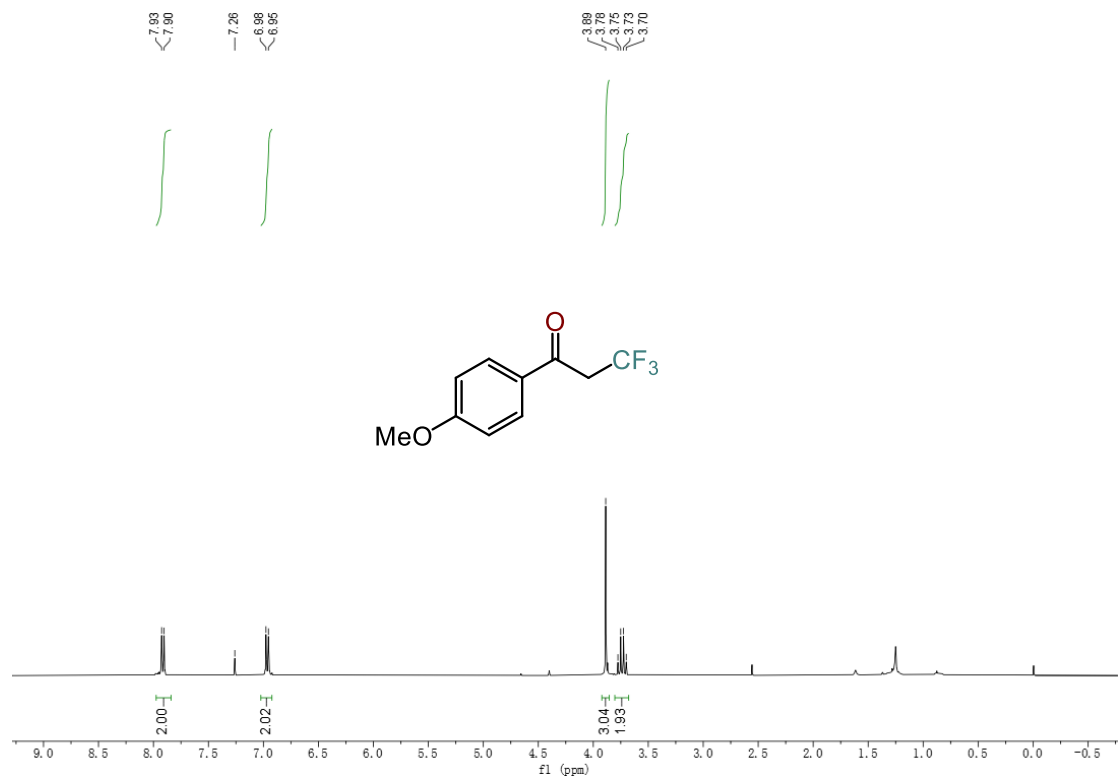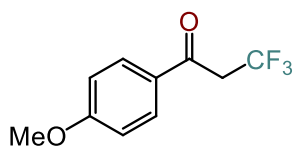

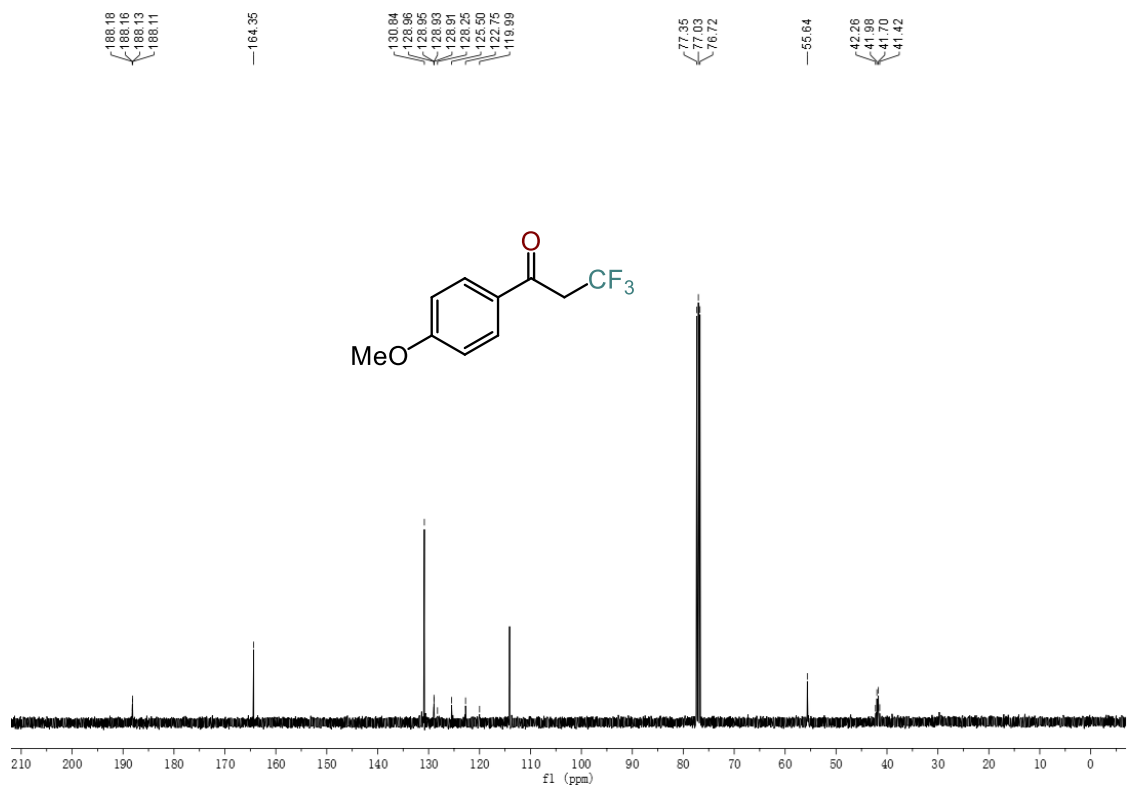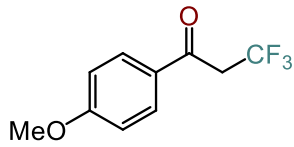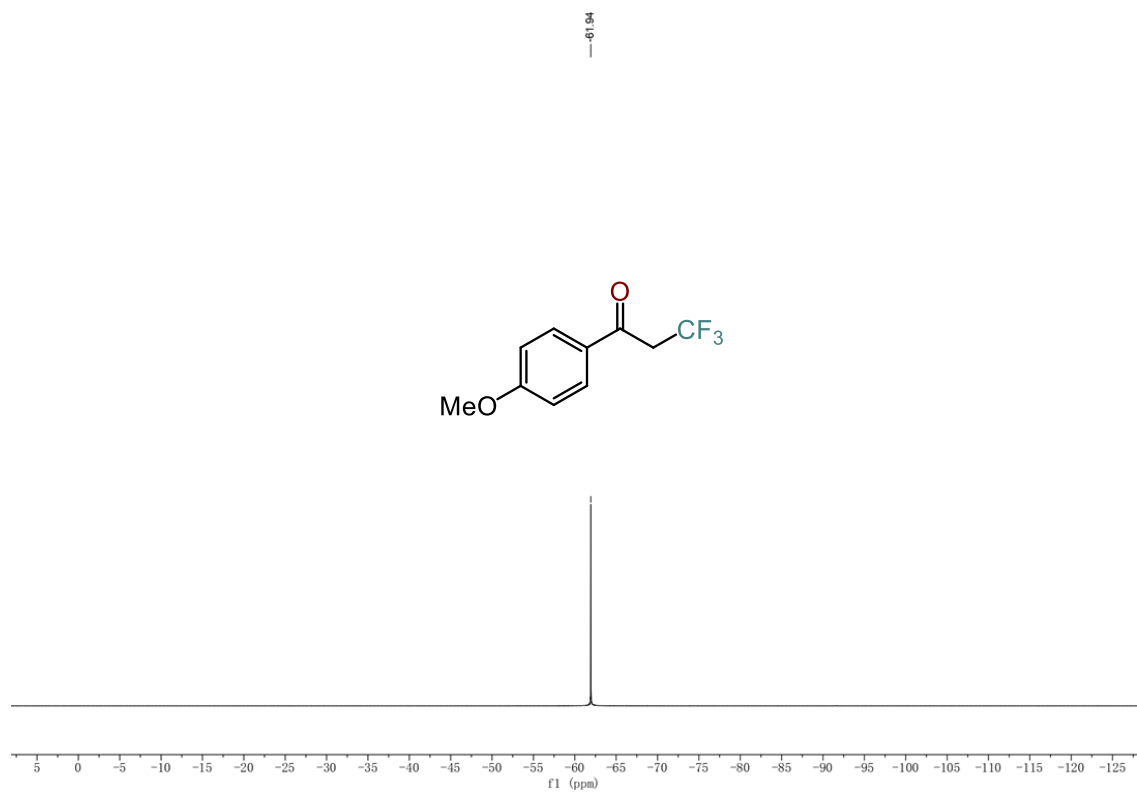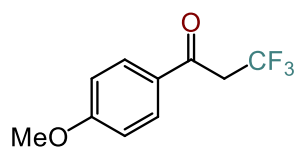

**<sup>1</sup>H NMR (400 MHz, CDCl<sub>3</sub>), <sup>13</sup>C NMR (100 MHz, CDCl<sub>3</sub>) and <sup>19</sup>F NMR (470 MHz, CDCl<sub>3</sub>) spectra for 4e**

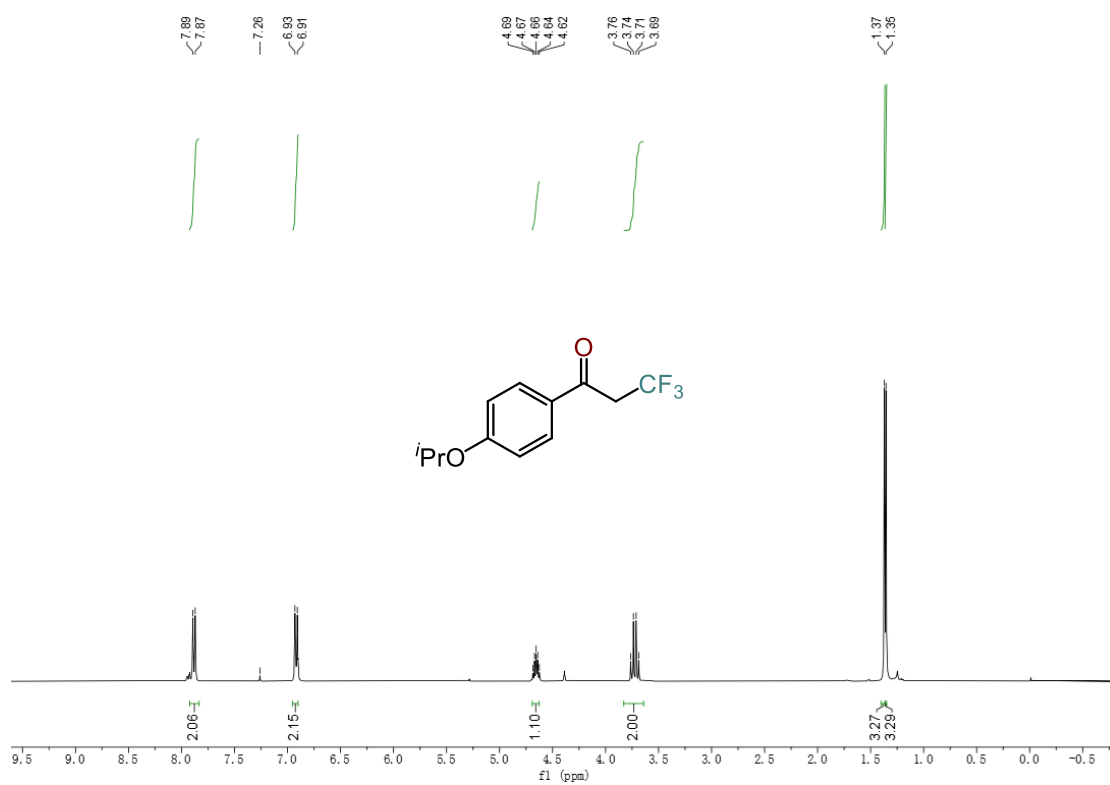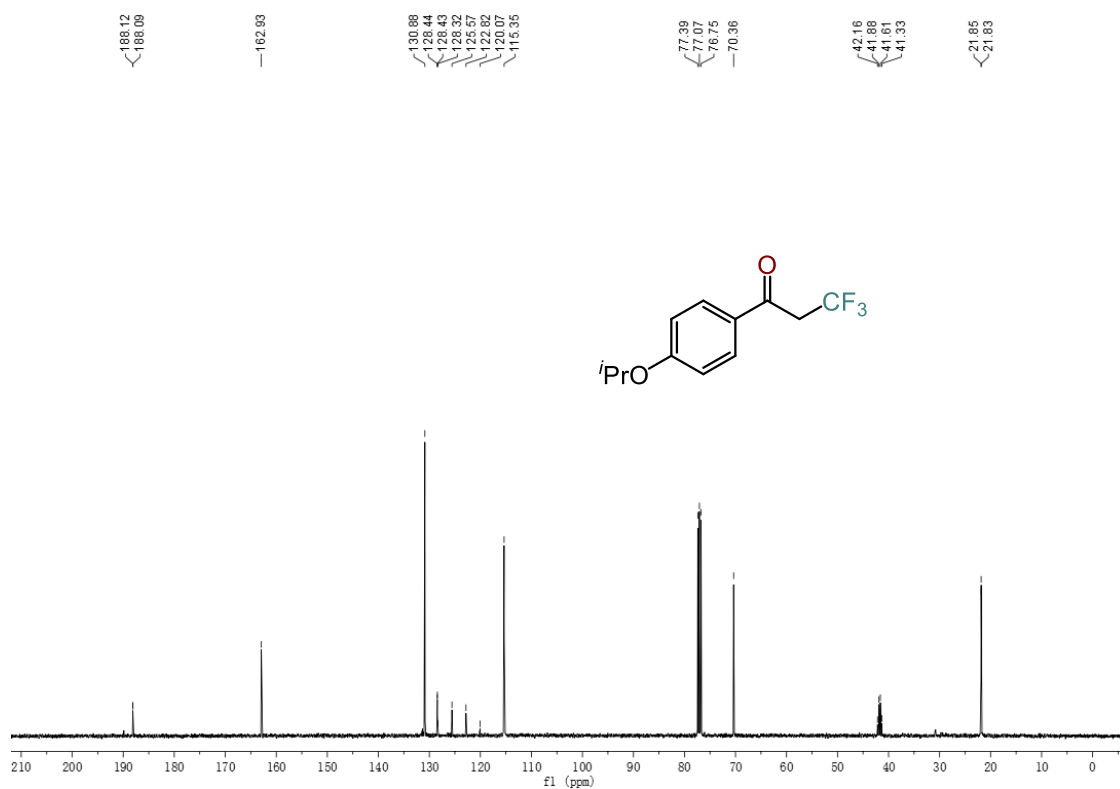

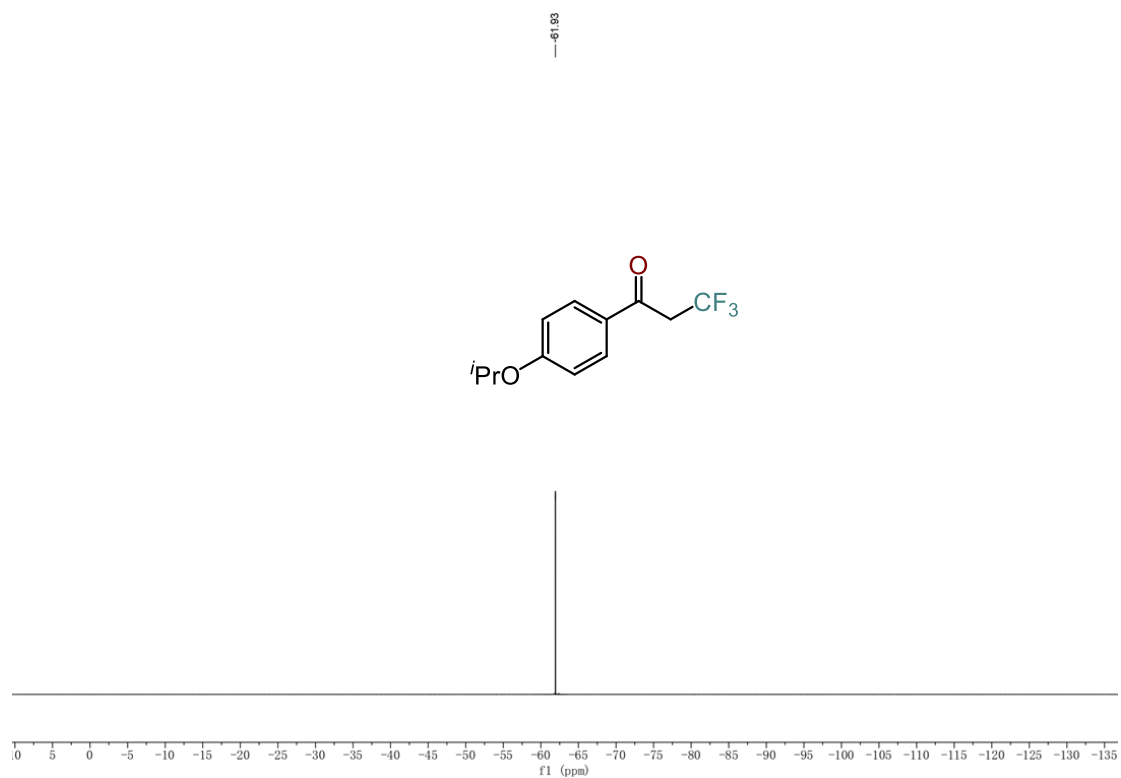

**$^1\text{H}$  NMR (400 MHz,  $\text{CDCl}_3$ ),  $^{13}\text{C}$  NMR (100 MHz,  $\text{CDCl}_3$ ) and  $^{19}\text{F}$  NMR (470 MHz,  $\text{CDCl}_3$ ) spectra for 4f**

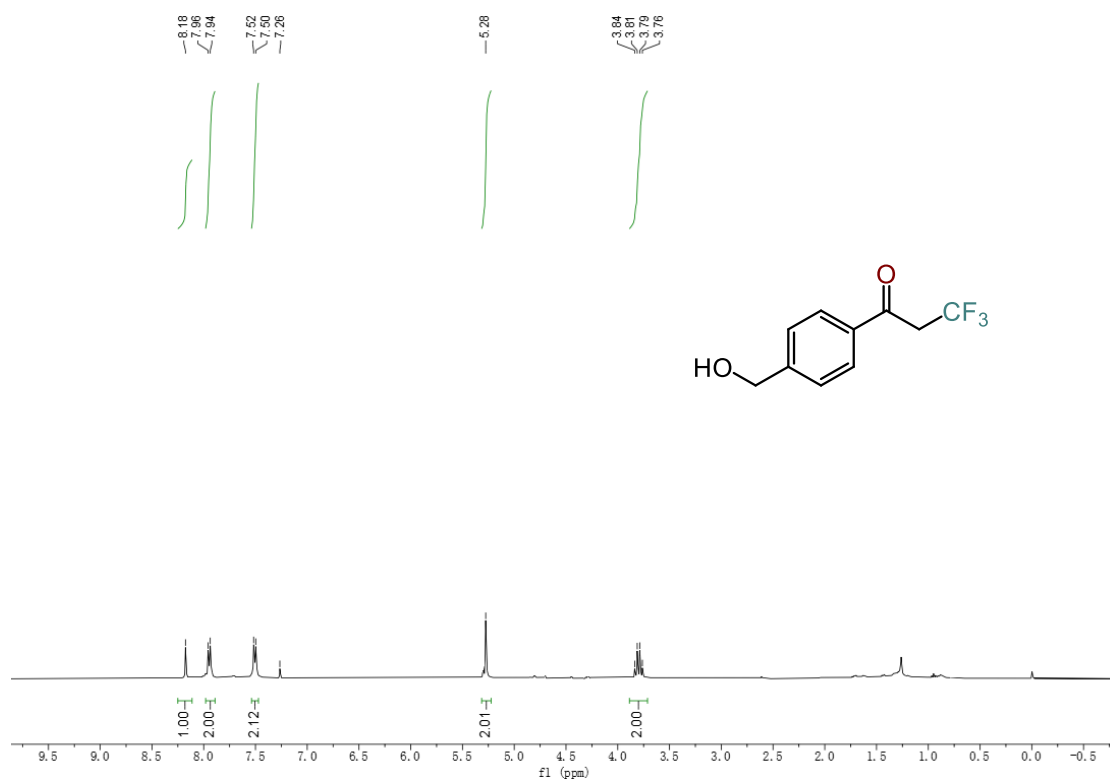

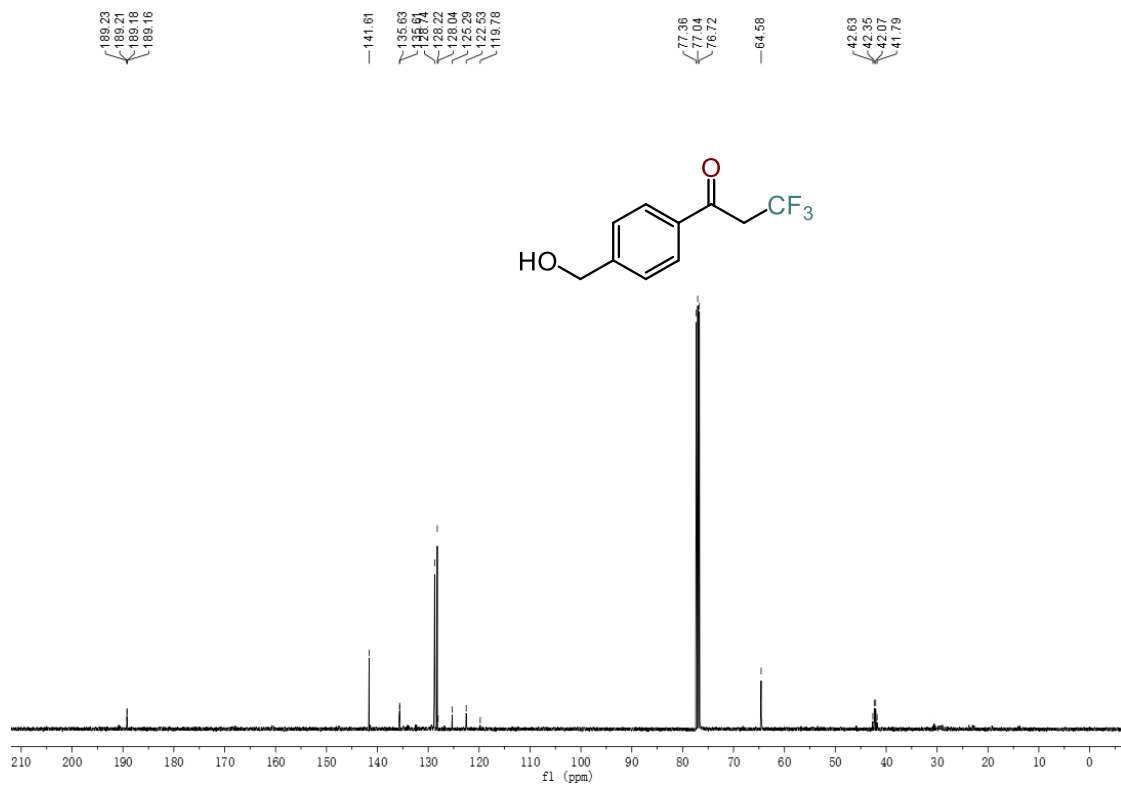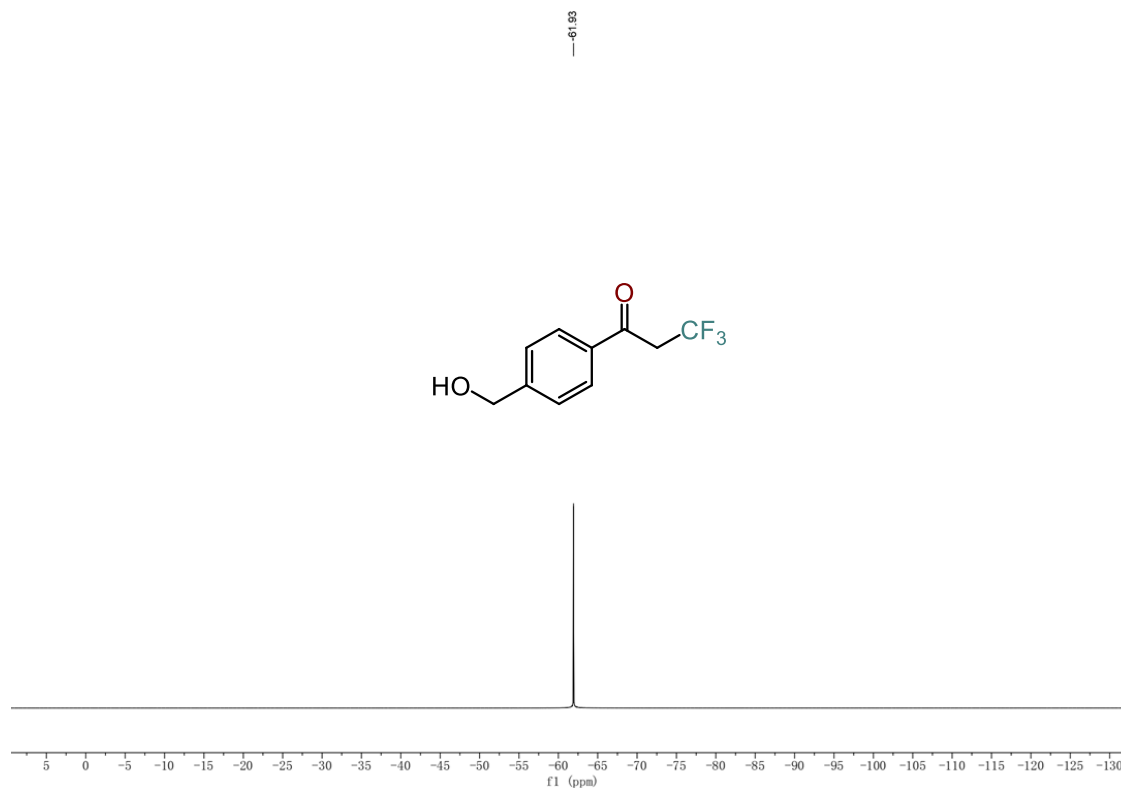

**<sup>1</sup>H NMR (400 MHz, CDCl<sub>3</sub>), <sup>13</sup>C NMR (100 MHz, CDCl<sub>3</sub>) and <sup>19</sup>F NMR (470 MHz, CDCl<sub>3</sub>) spectra for 4g**

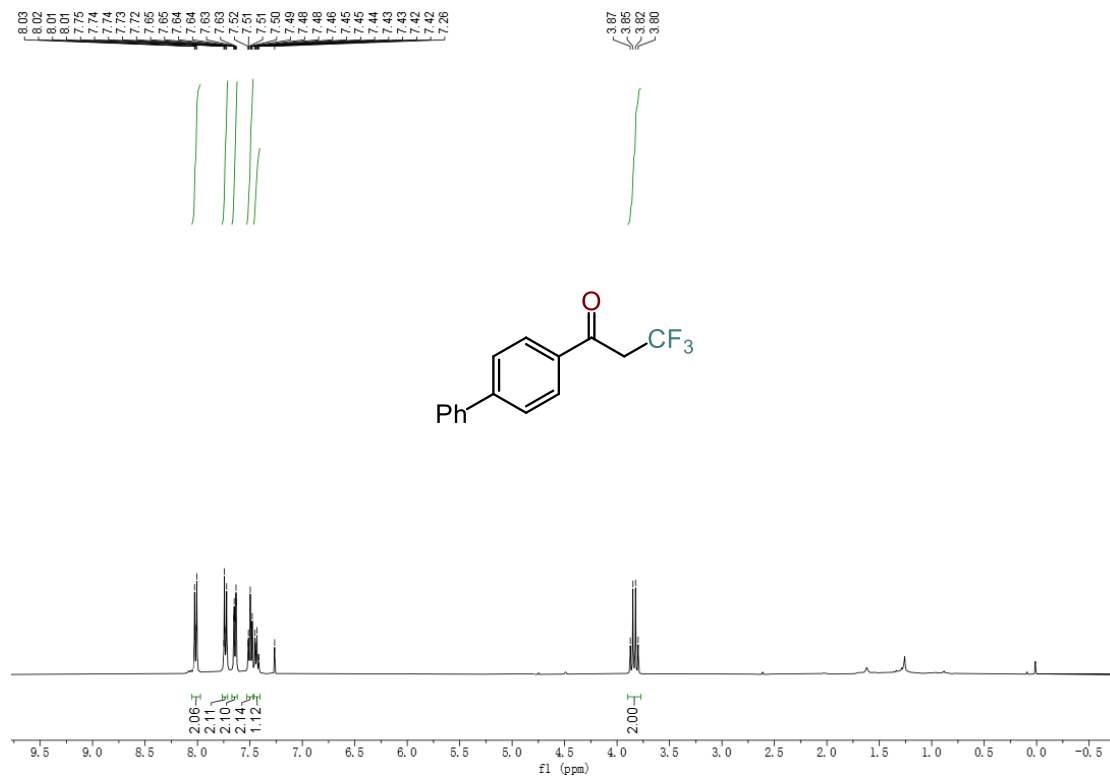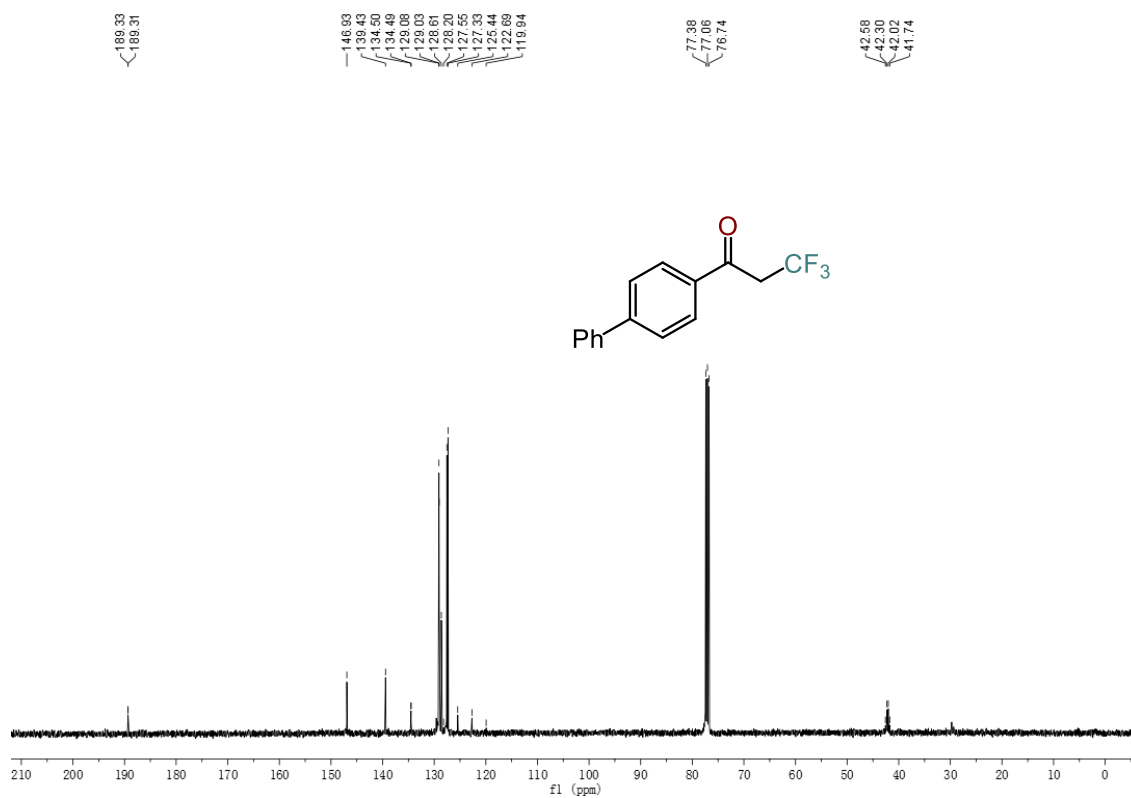

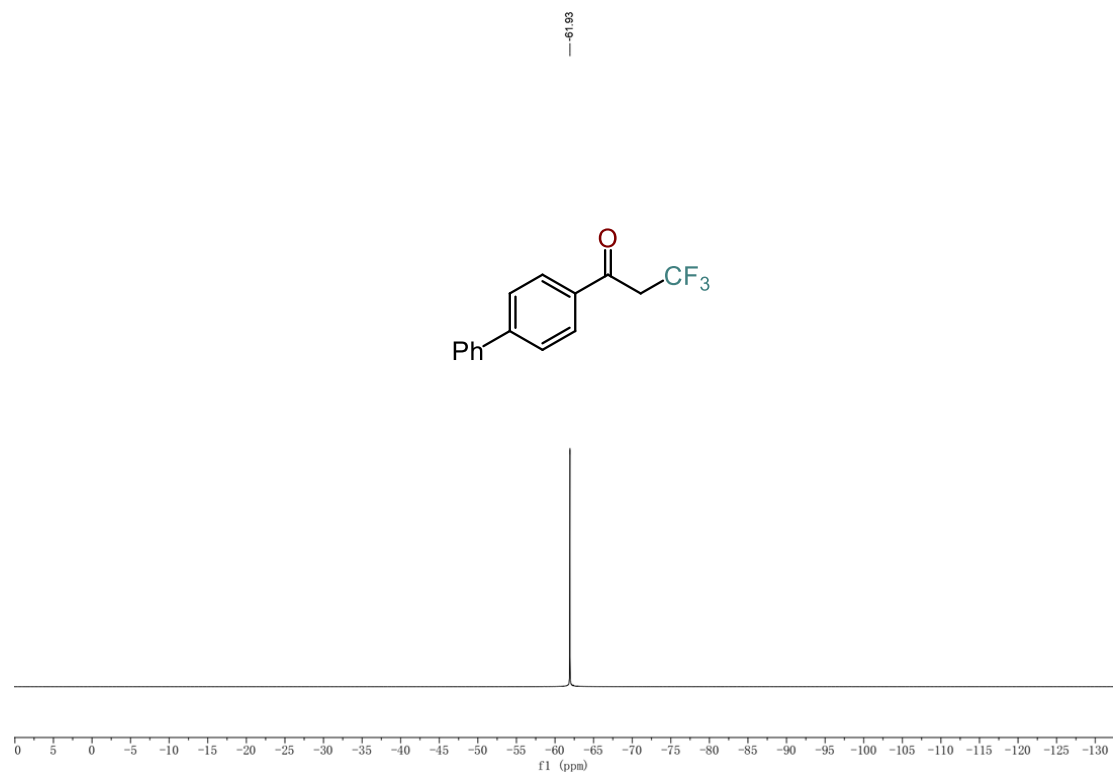

**<sup>1</sup>H NMR (400 MHz, CDCl<sub>3</sub>), <sup>13</sup>C NMR (100 MHz, CDCl<sub>3</sub>) and <sup>19</sup>F NMR (470 MHz, CDCl<sub>3</sub>) spectra for 4h**

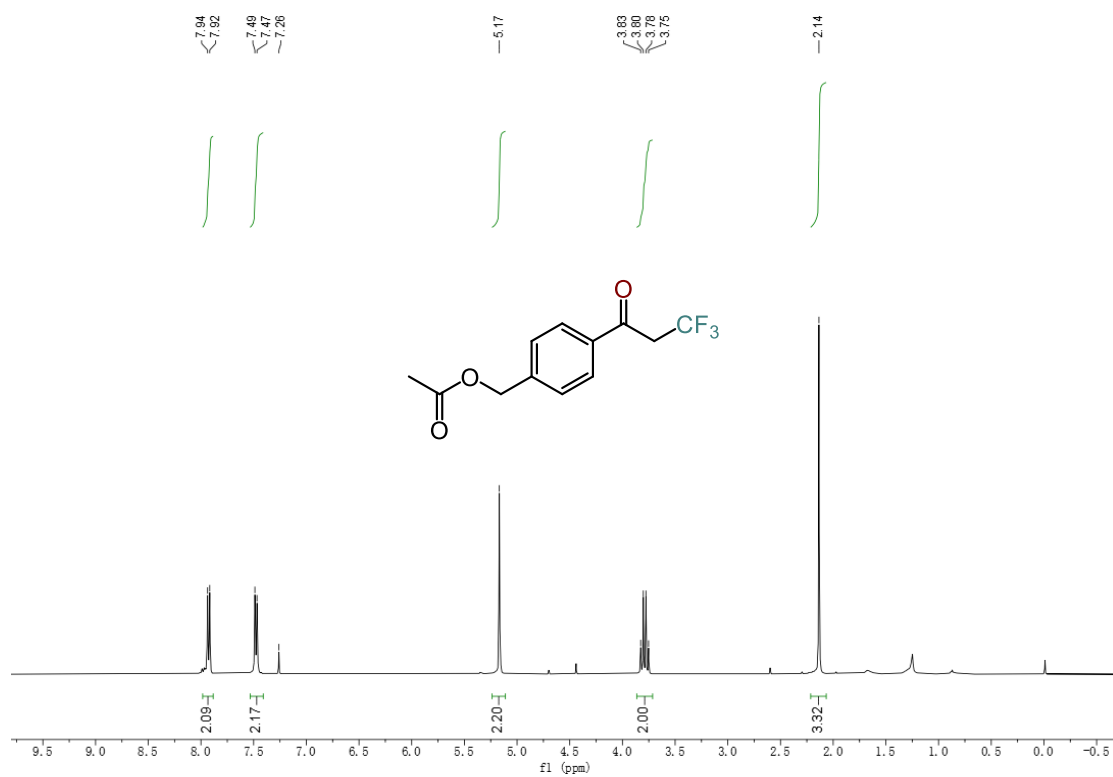

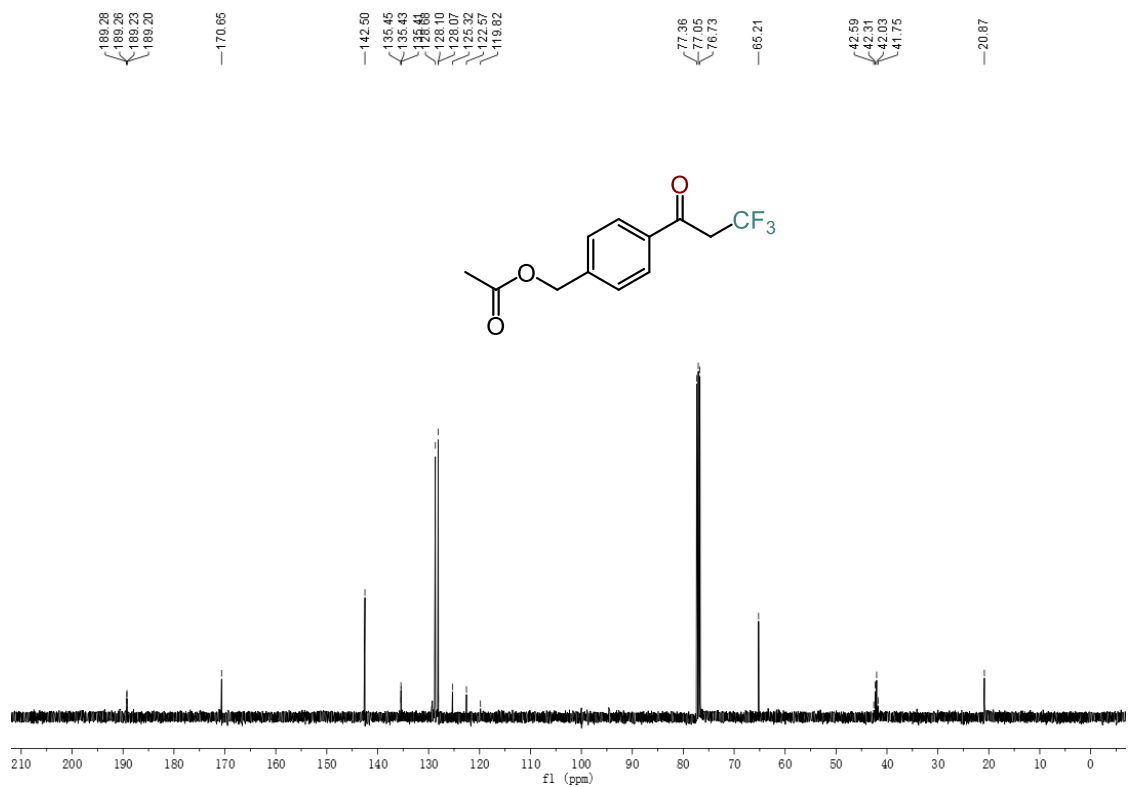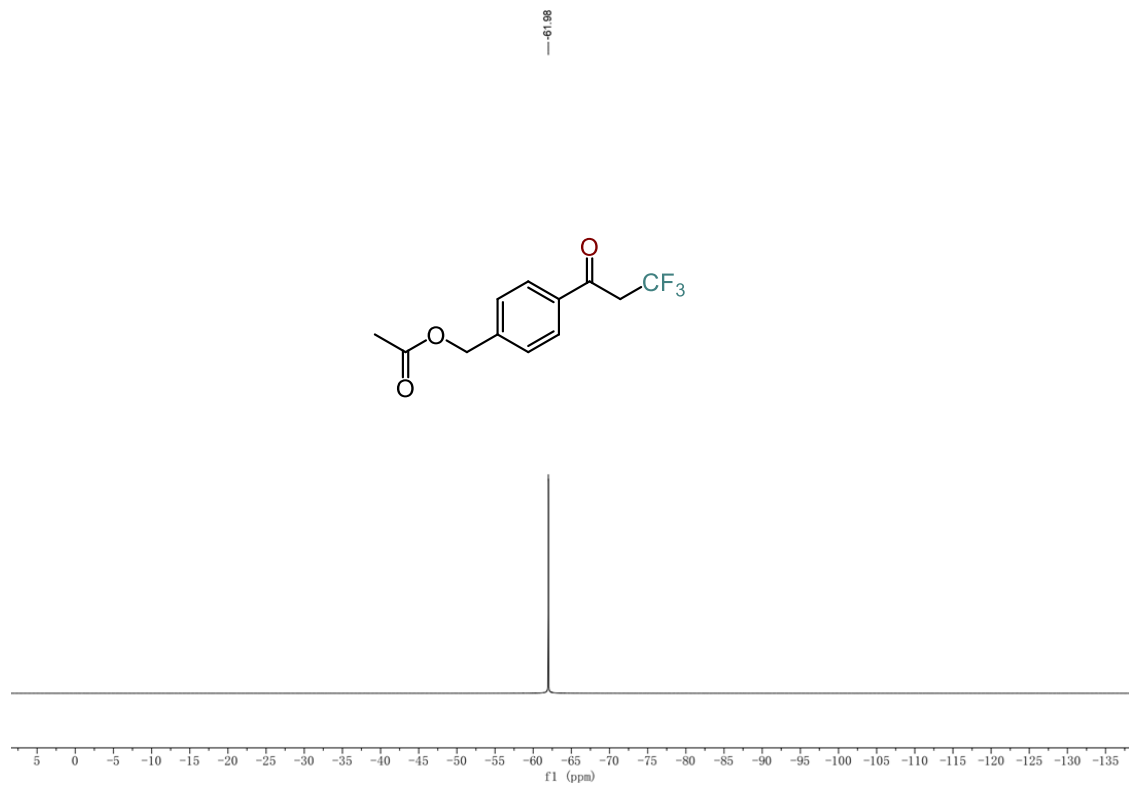

**<sup>1</sup>H NMR (400 MHz, CDCl<sub>3</sub>), <sup>13</sup>C NMR (100 MHz, CDCl<sub>3</sub>) and <sup>19</sup>F NMR (470 MHz, CDCl<sub>3</sub>) spectra for 4i**

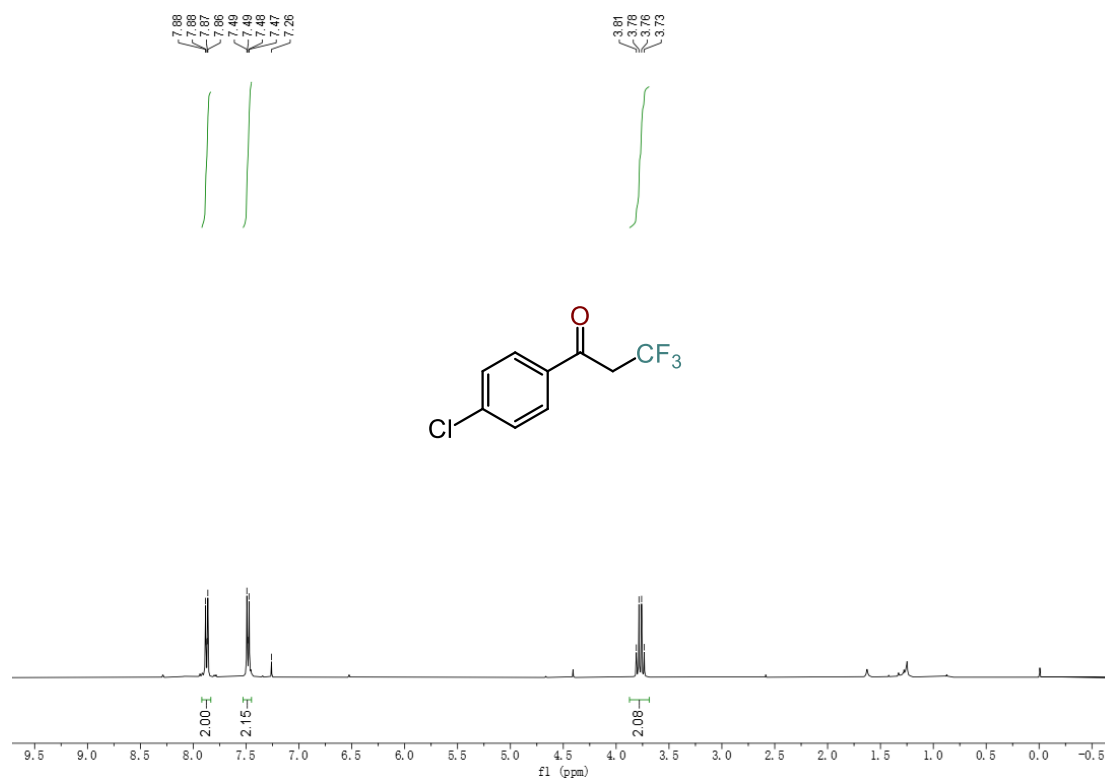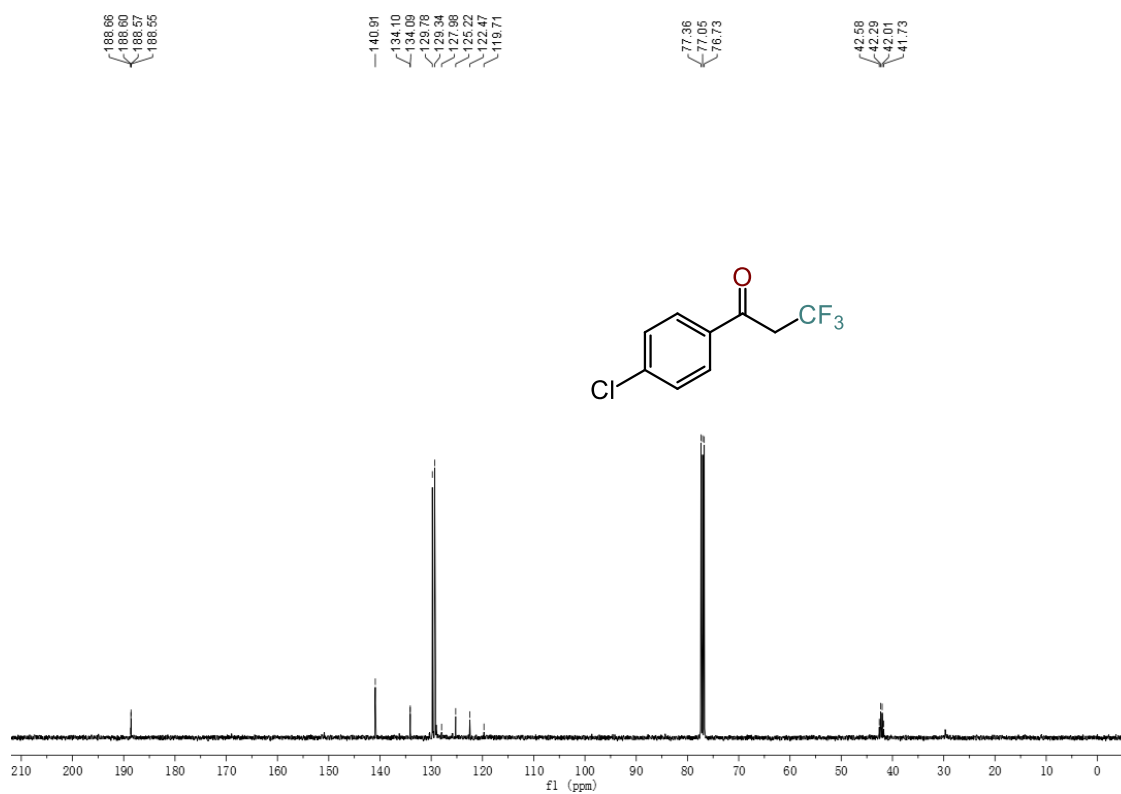

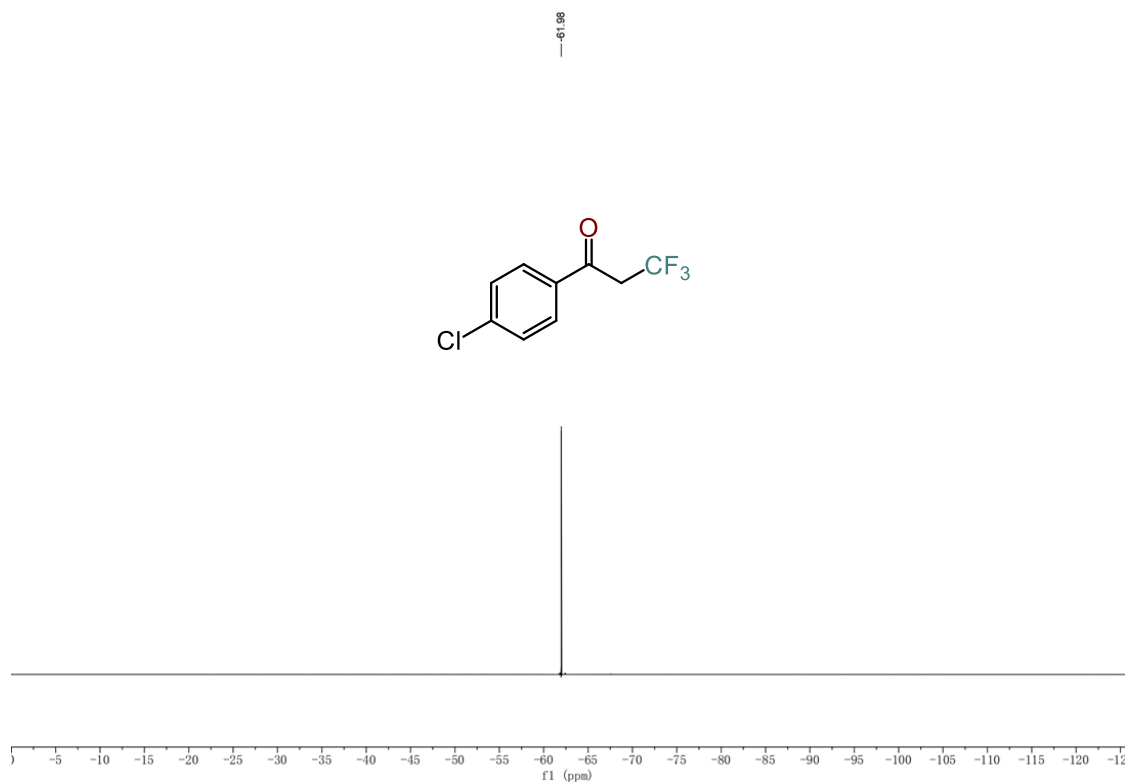

**<sup>1</sup>H NMR (400 MHz, CDCl<sub>3</sub>), <sup>13</sup>C NMR (100 MHz, CDCl<sub>3</sub>) and <sup>19</sup>F NMR (470 MHz, CDCl<sub>3</sub>) spectra for 4j**

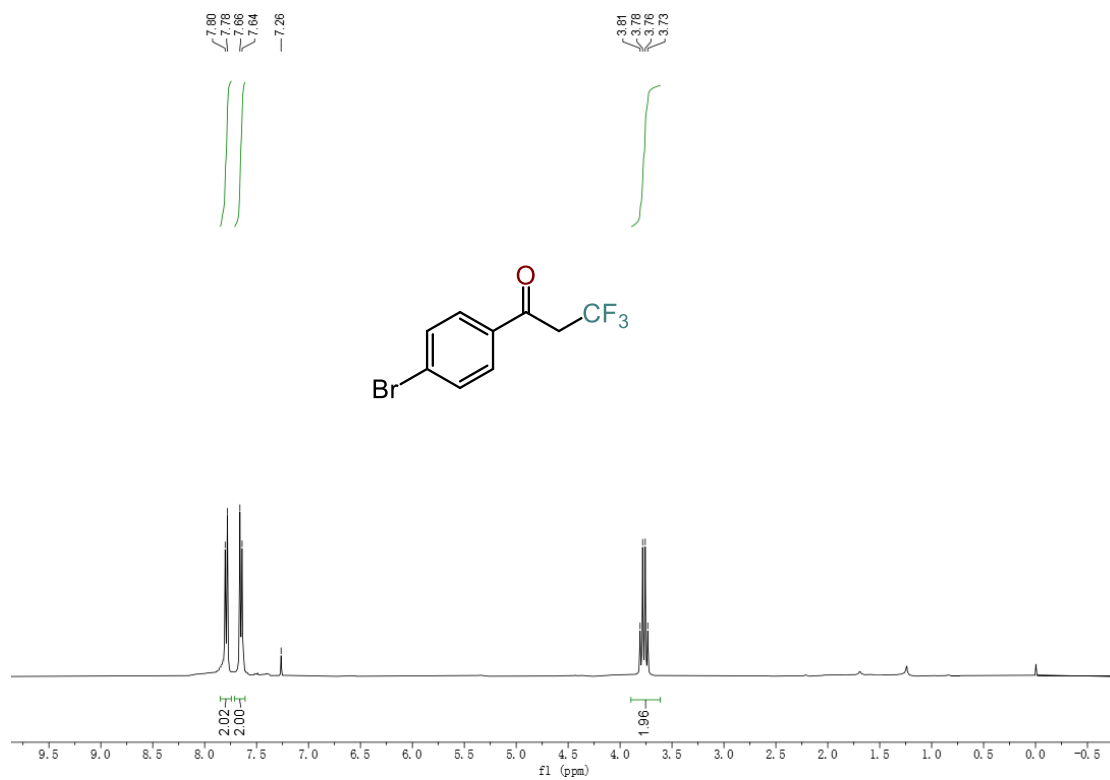

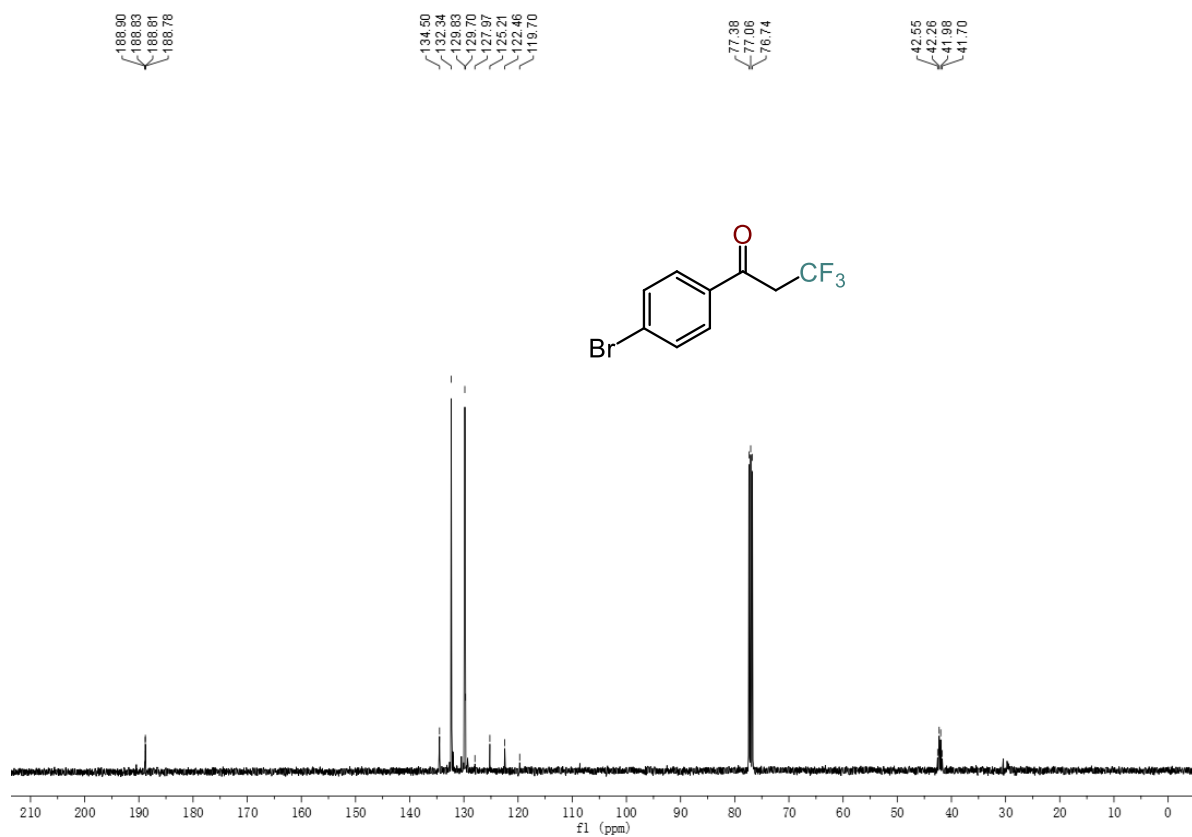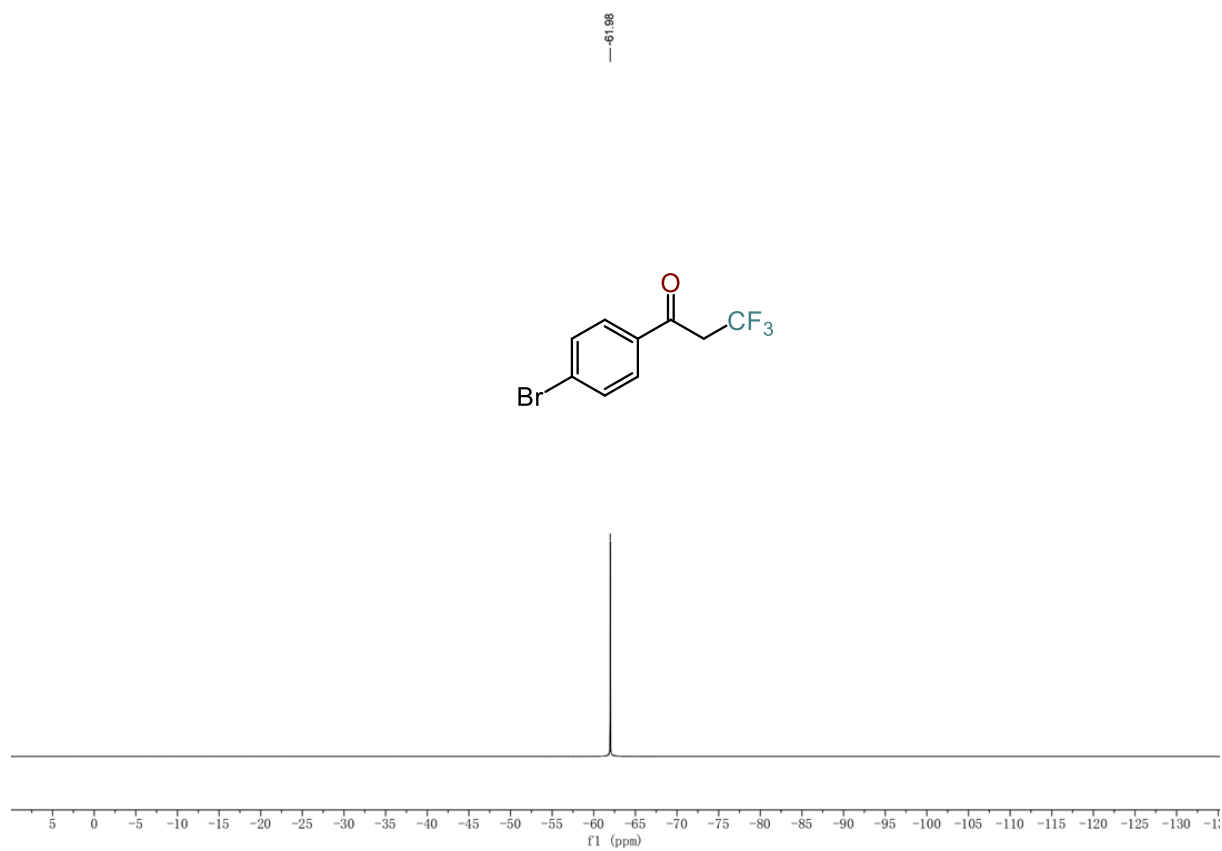

**<sup>1</sup>H NMR (400 MHz, CDCl<sub>3</sub>), <sup>13</sup>C NMR (100 MHz, CDCl<sub>3</sub>) and <sup>19</sup>F NMR (470 MHz, CDCl<sub>3</sub>) spectra for 4k**

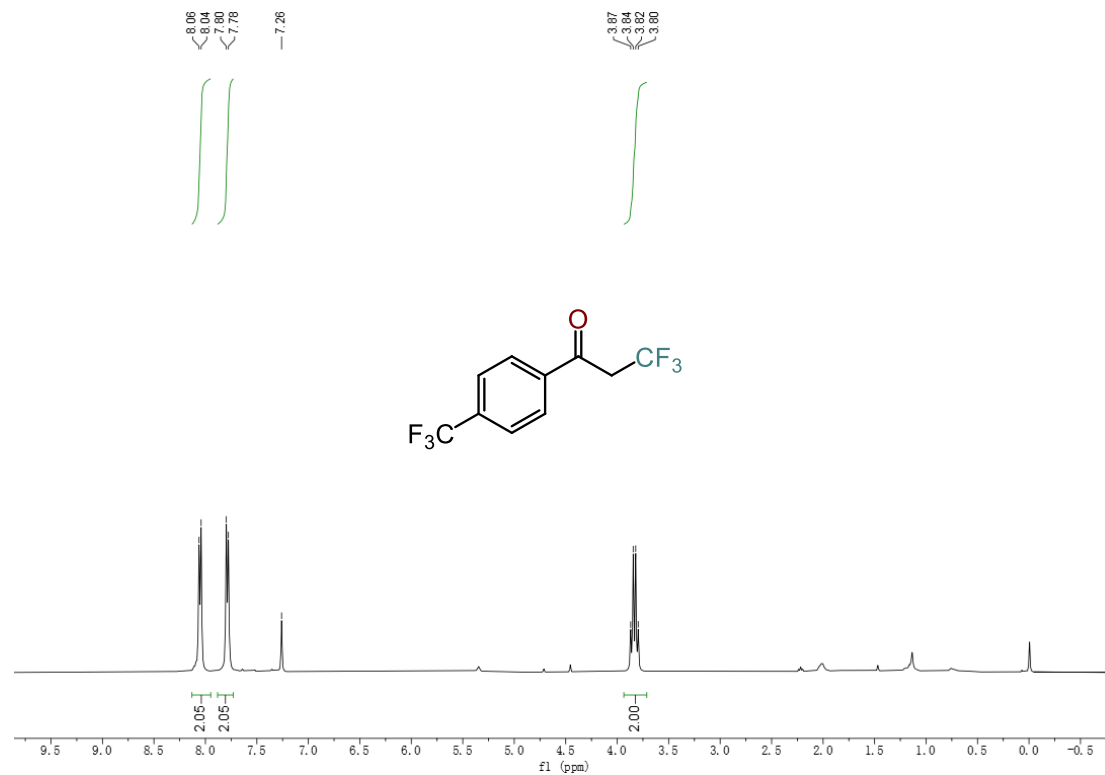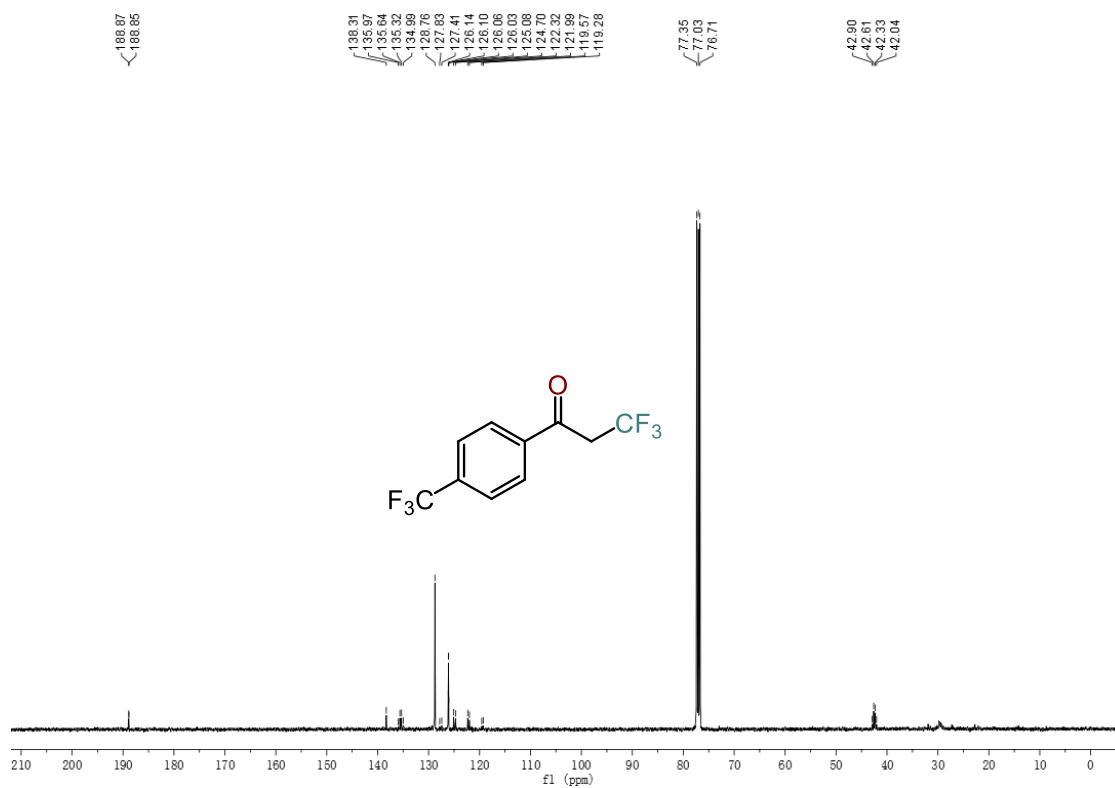

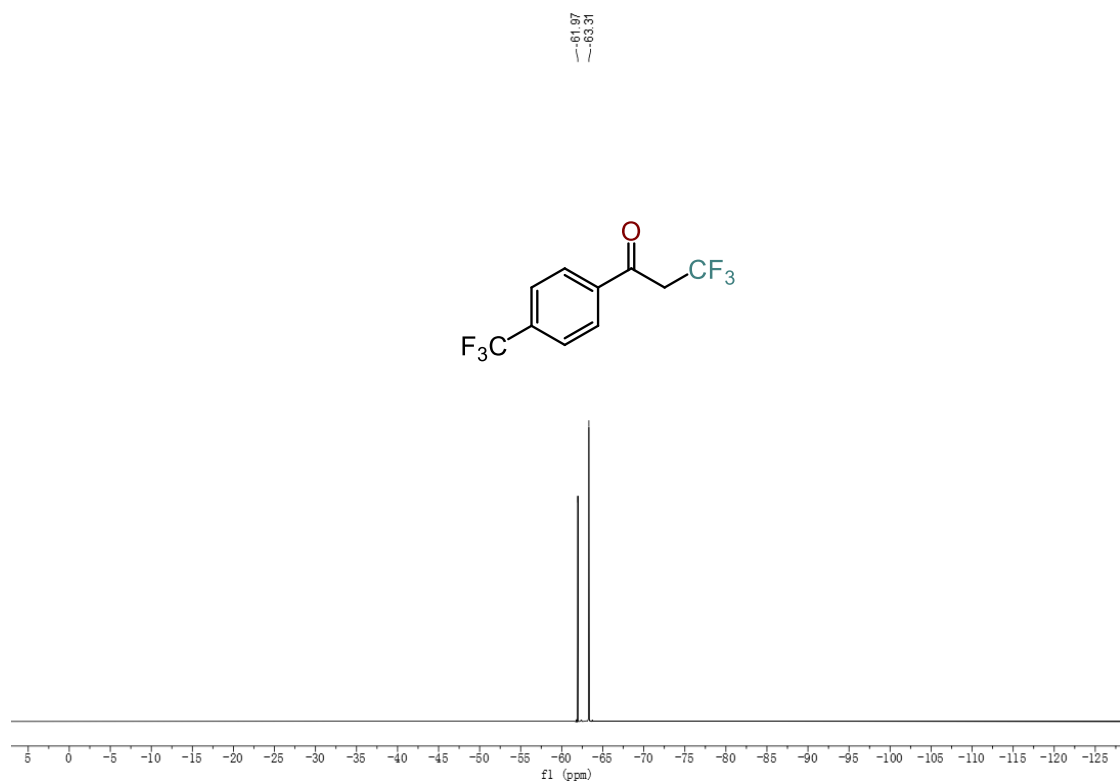

**<sup>1</sup>H NMR (400 MHz, CDCl<sub>3</sub>), <sup>13</sup>C NMR (100 MHz, CDCl<sub>3</sub>) and <sup>19</sup>F NMR (470 MHz, CDCl<sub>3</sub>) spectra for 4I**

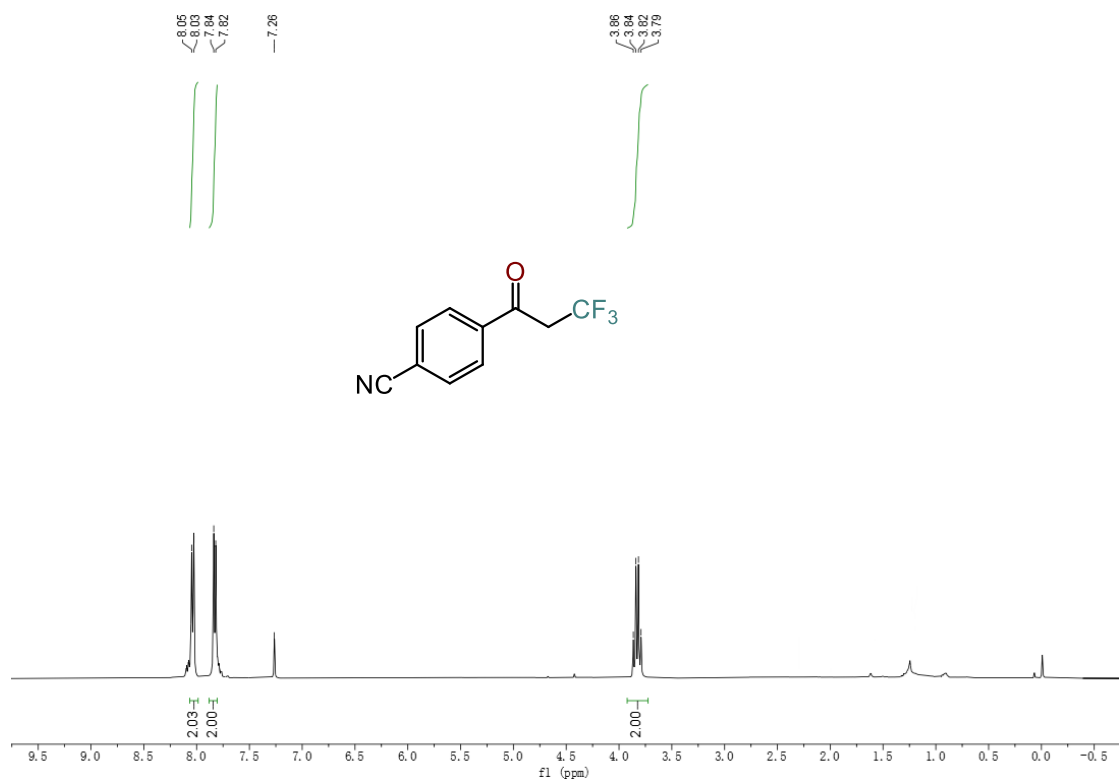

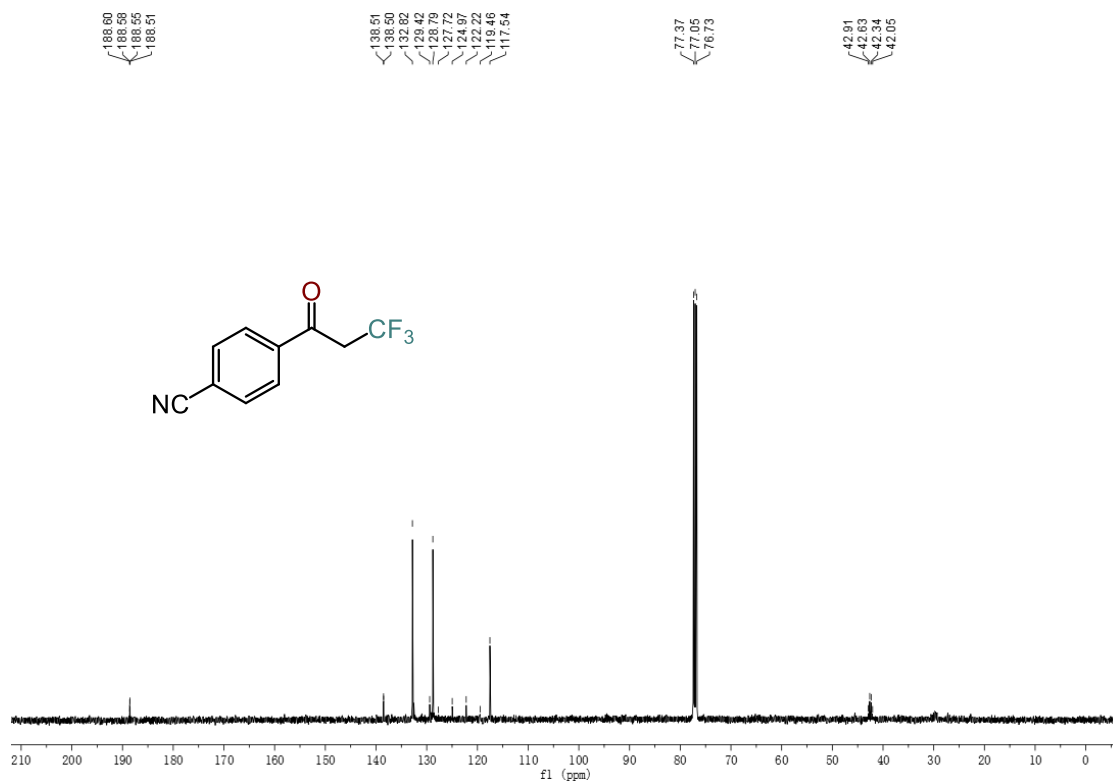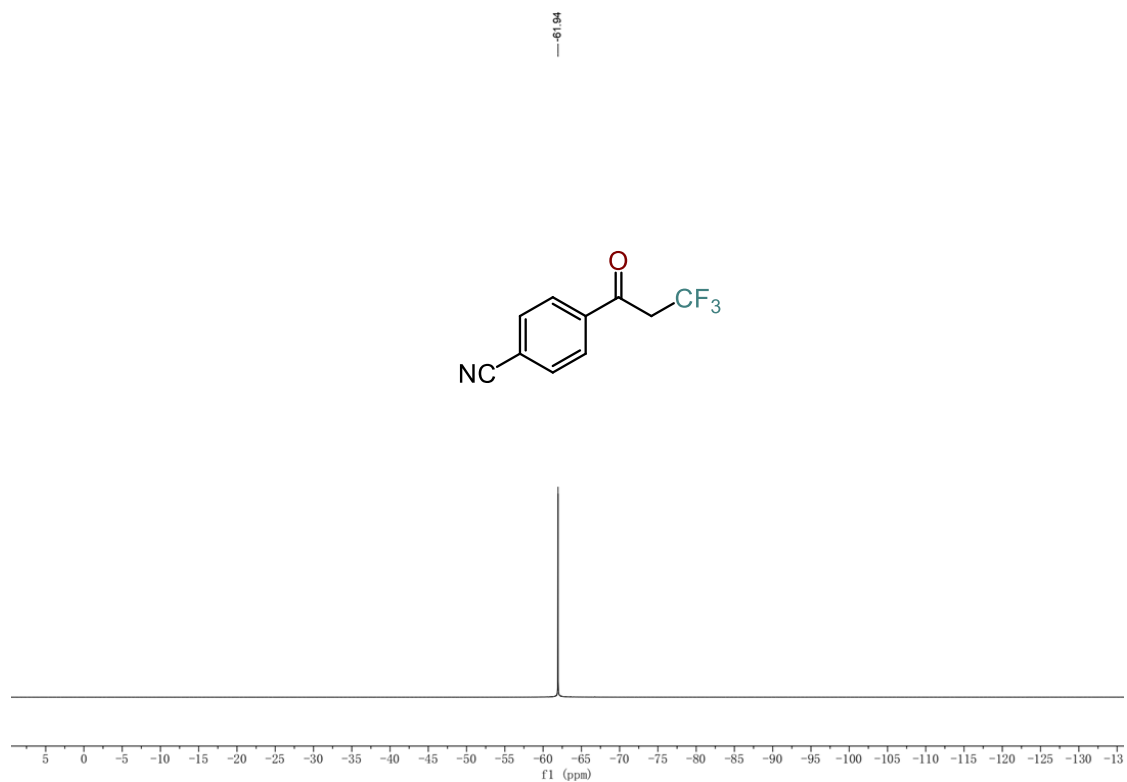

**$^1\text{H}$  NMR (400 MHz,  $\text{CDCl}_3$ ),  $^{13}\text{C}$  NMR (100 MHz,  $\text{CDCl}_3$ ) and  $^{19}\text{F}$  NMR (470 MHz,  $\text{CDCl}_3$ ) spectra for 4m**

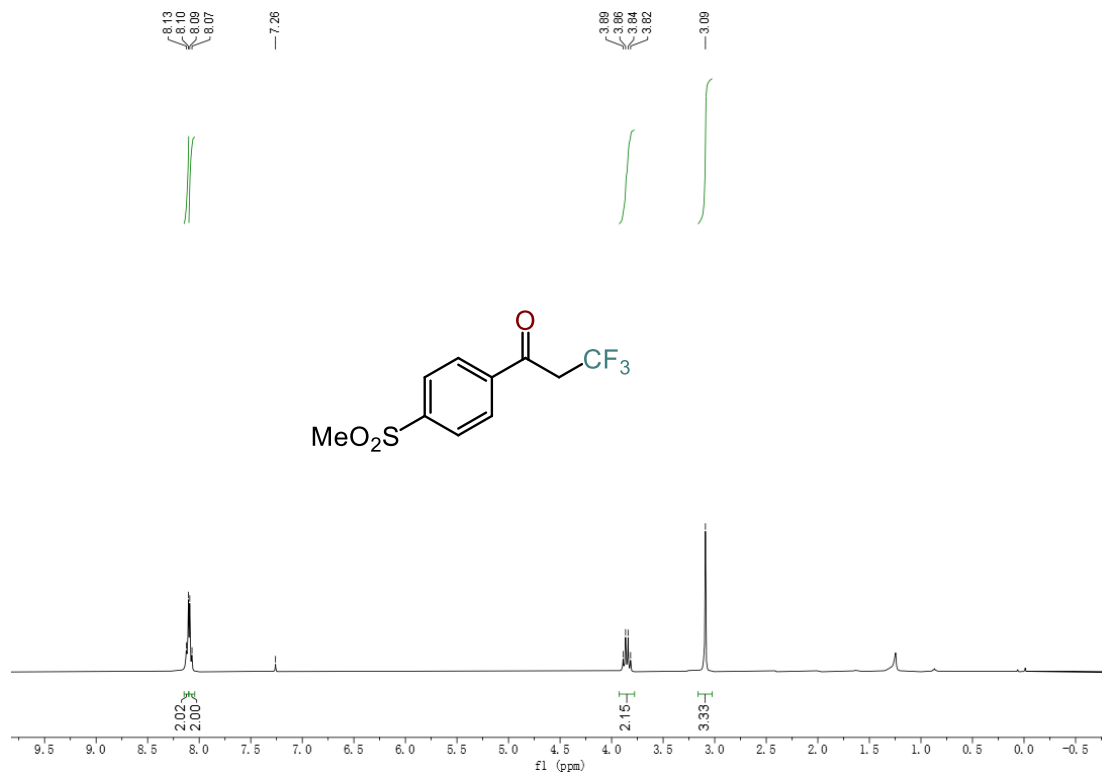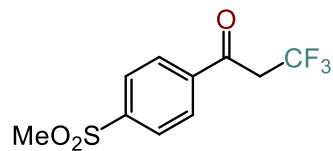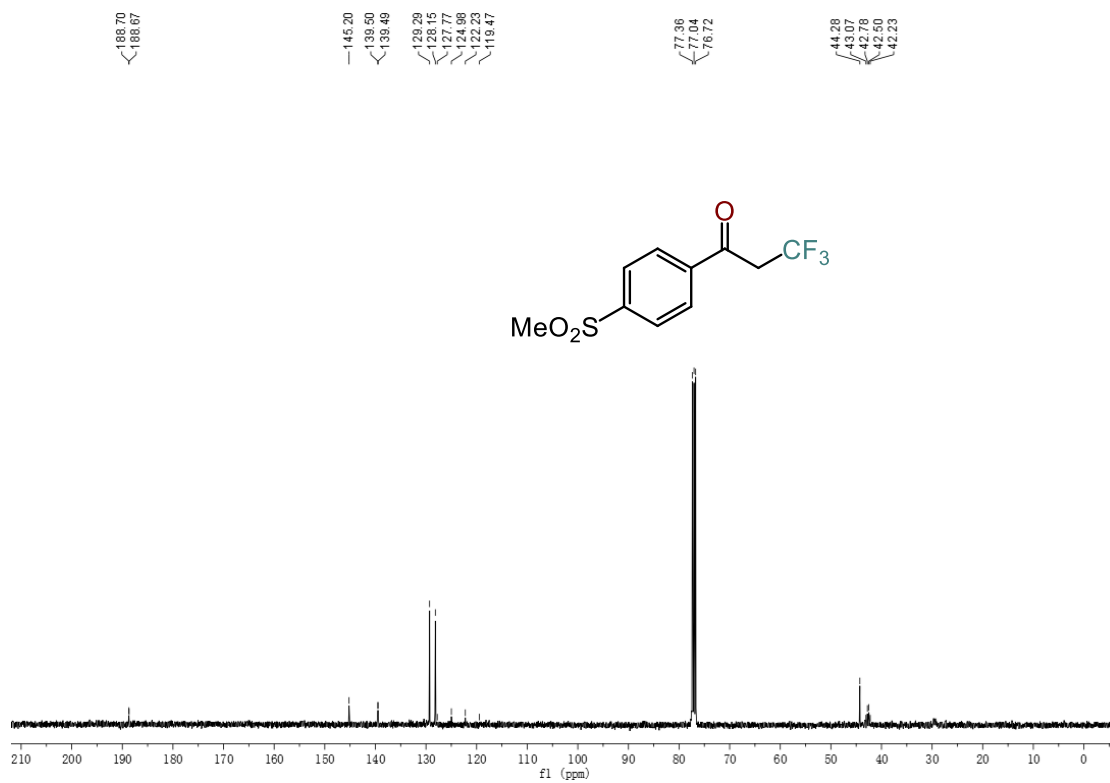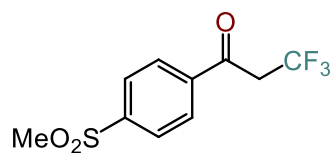

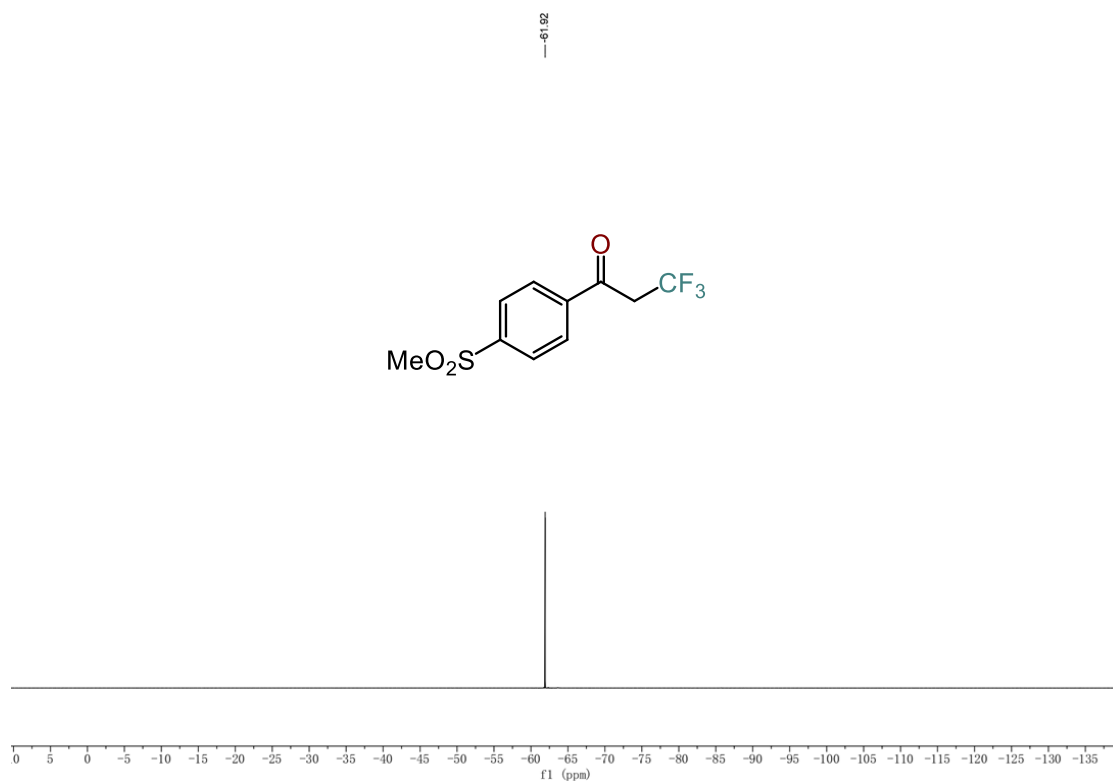

**<sup>1</sup>H NMR (400 MHz, CDCl<sub>3</sub>), <sup>13</sup>C NMR (100 MHz, CDCl<sub>3</sub>) and <sup>19</sup>F NMR (470 MHz, CDCl<sub>3</sub>) spectra for 4n**

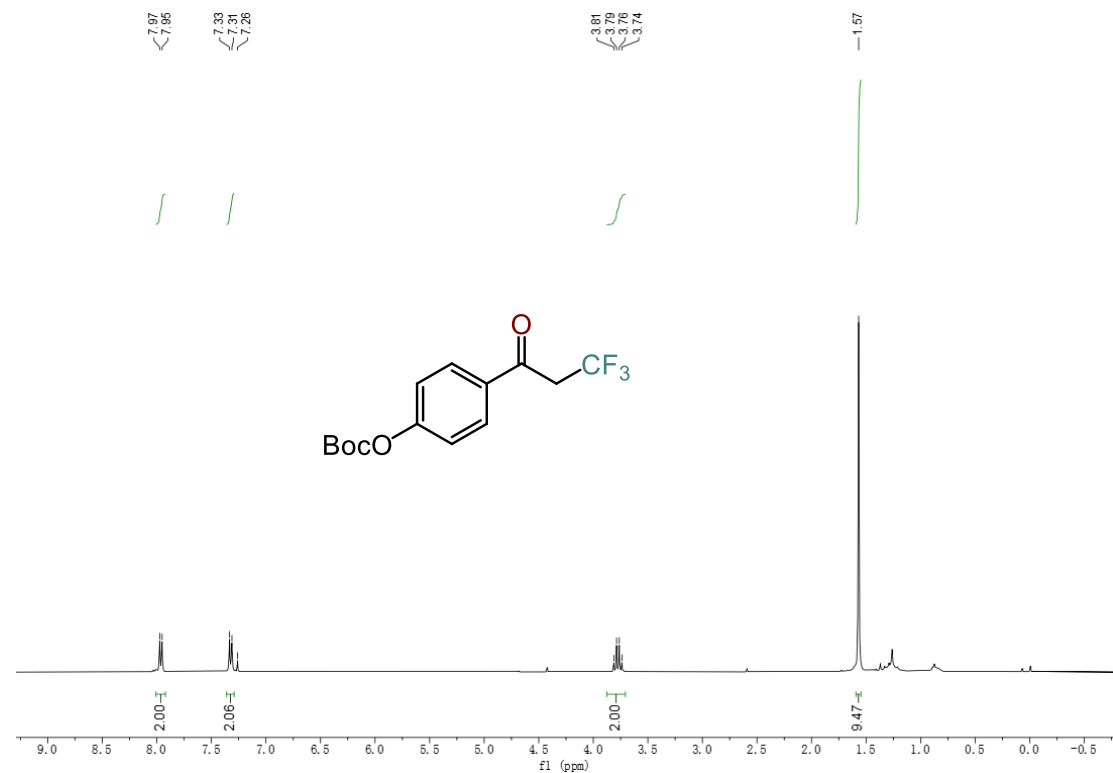

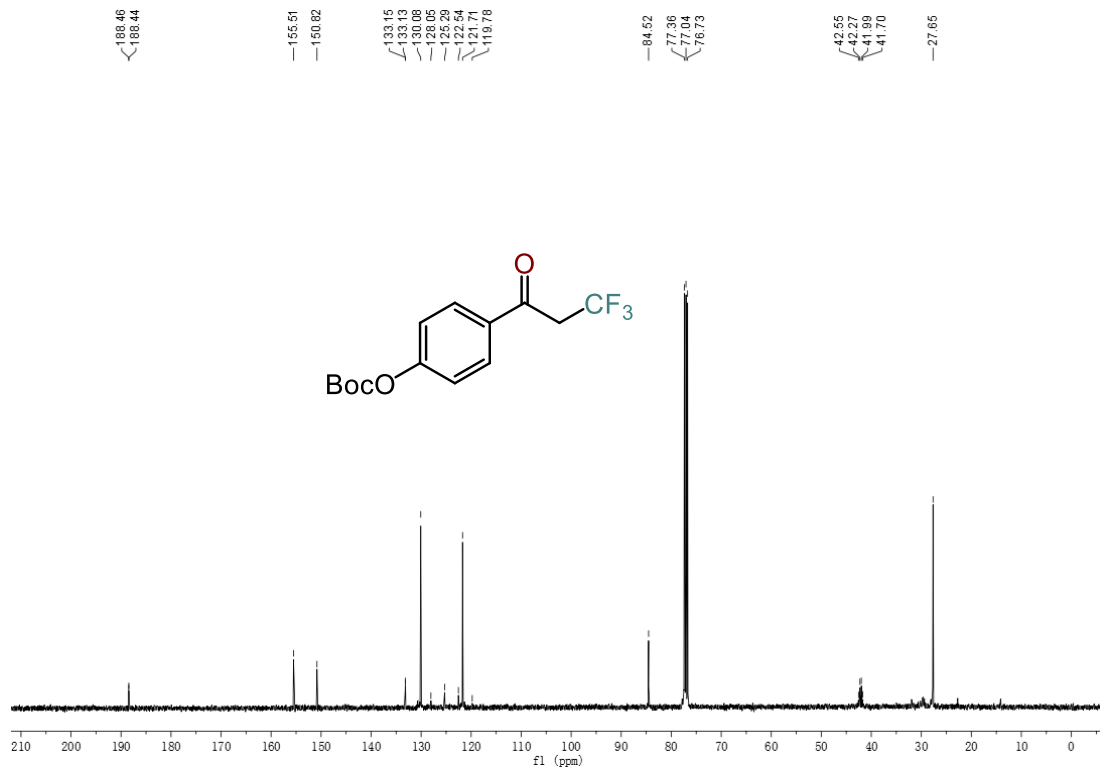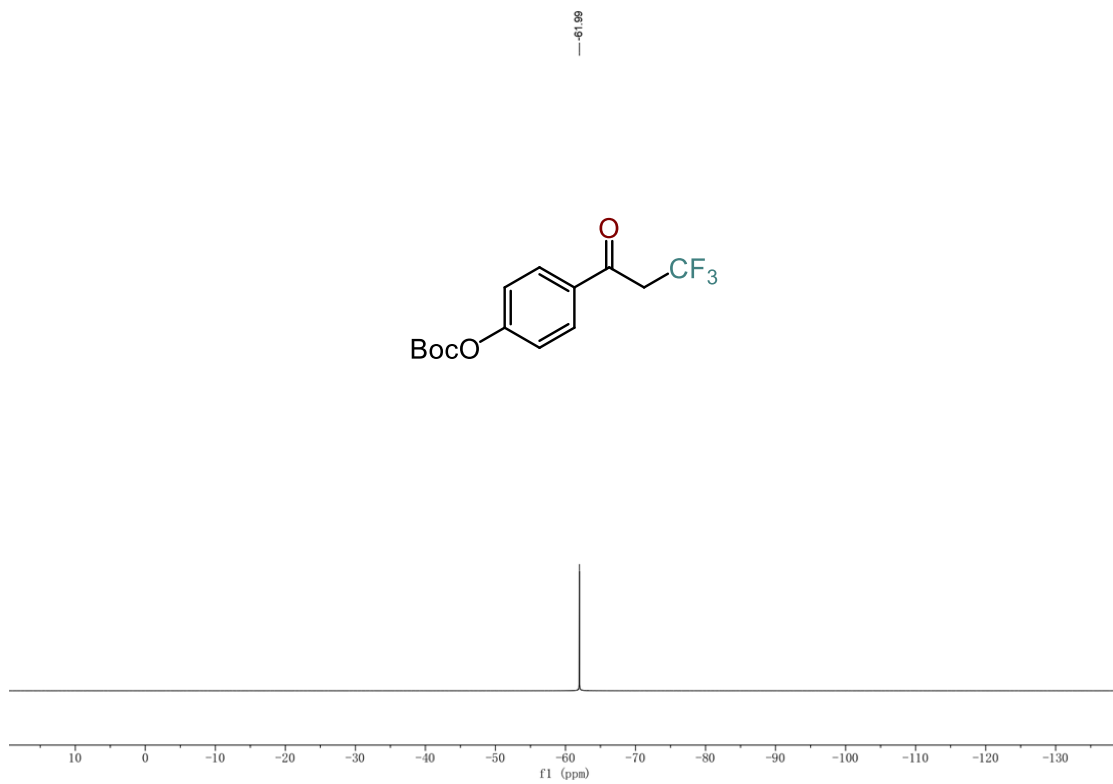

**<sup>1</sup>H NMR (400 MHz, CDCl<sub>3</sub>), <sup>13</sup>C NMR (100 MHz, CDCl<sub>3</sub>) and <sup>19</sup>F NMR (470 MHz, CDCl<sub>3</sub>) spectra for 4o**

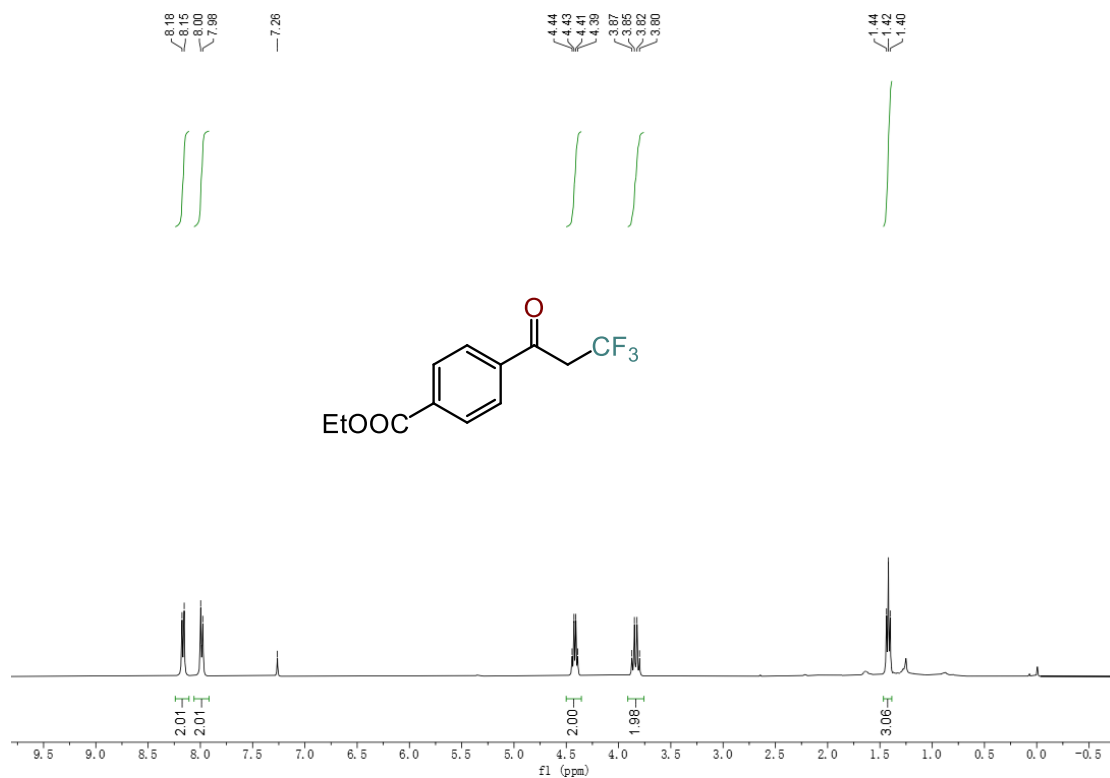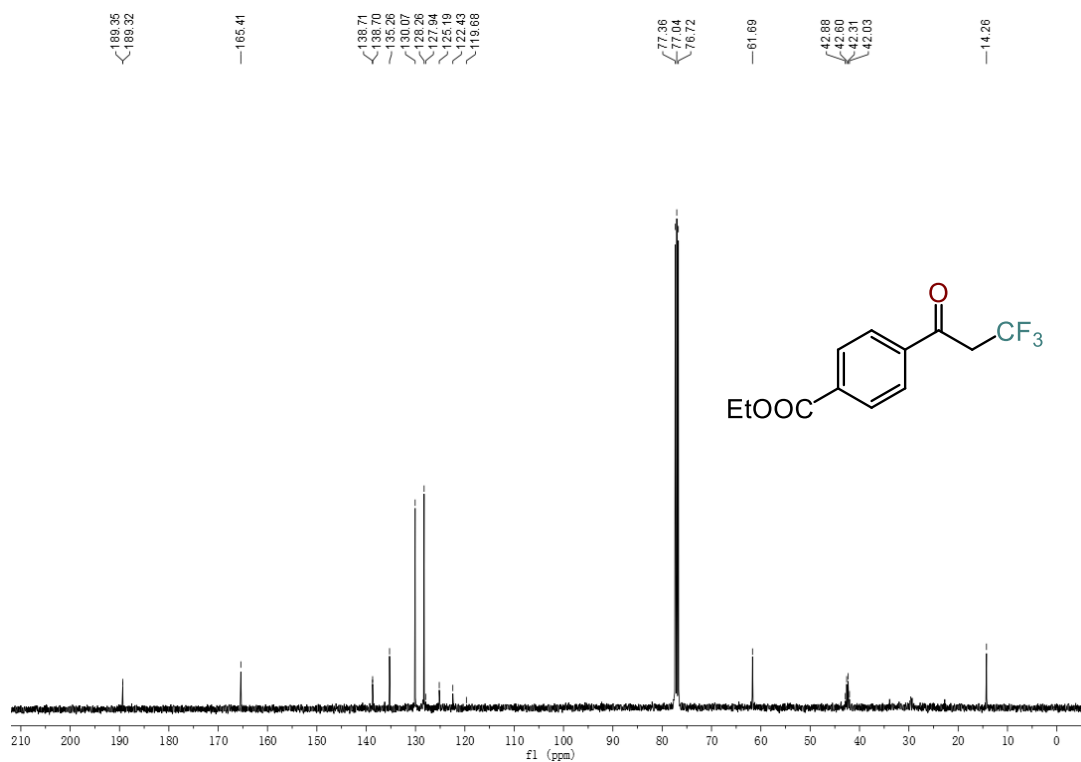

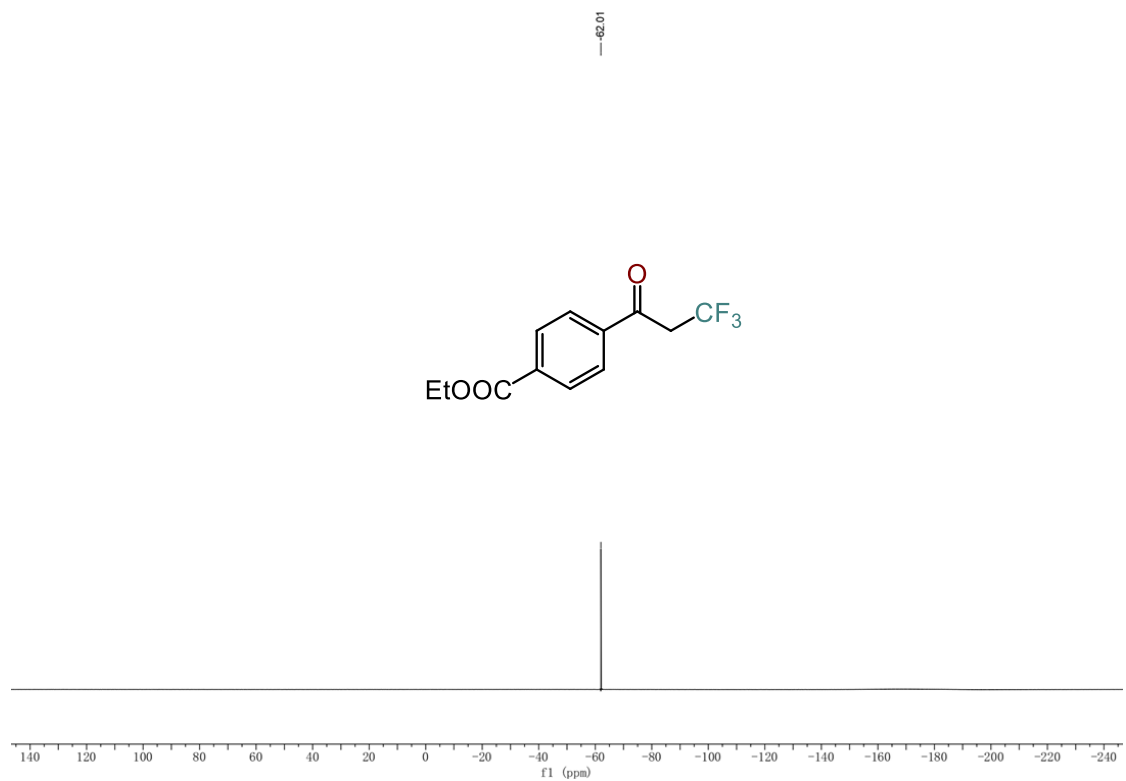

**<sup>1</sup>H NMR (400 MHz, CDCl<sub>3</sub>), <sup>13</sup>C NMR (100 MHz, CDCl<sub>3</sub>) and <sup>19</sup>F NMR (470 MHz, CDCl<sub>3</sub>) spectra for 4p**

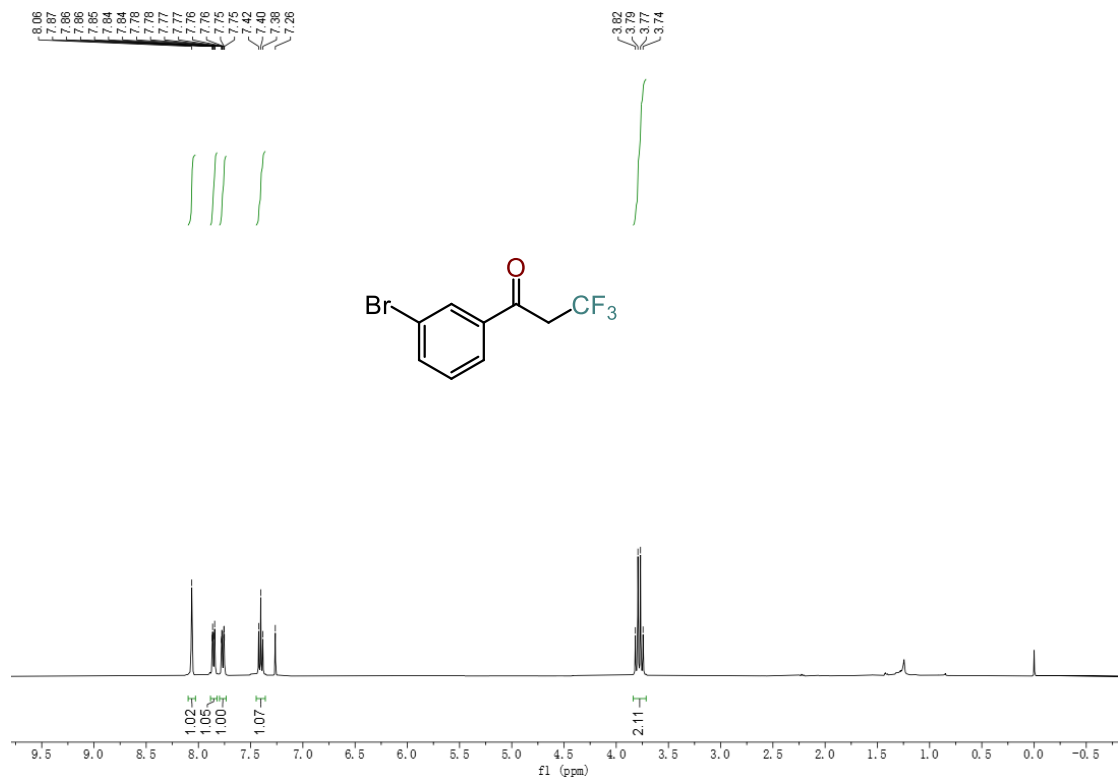

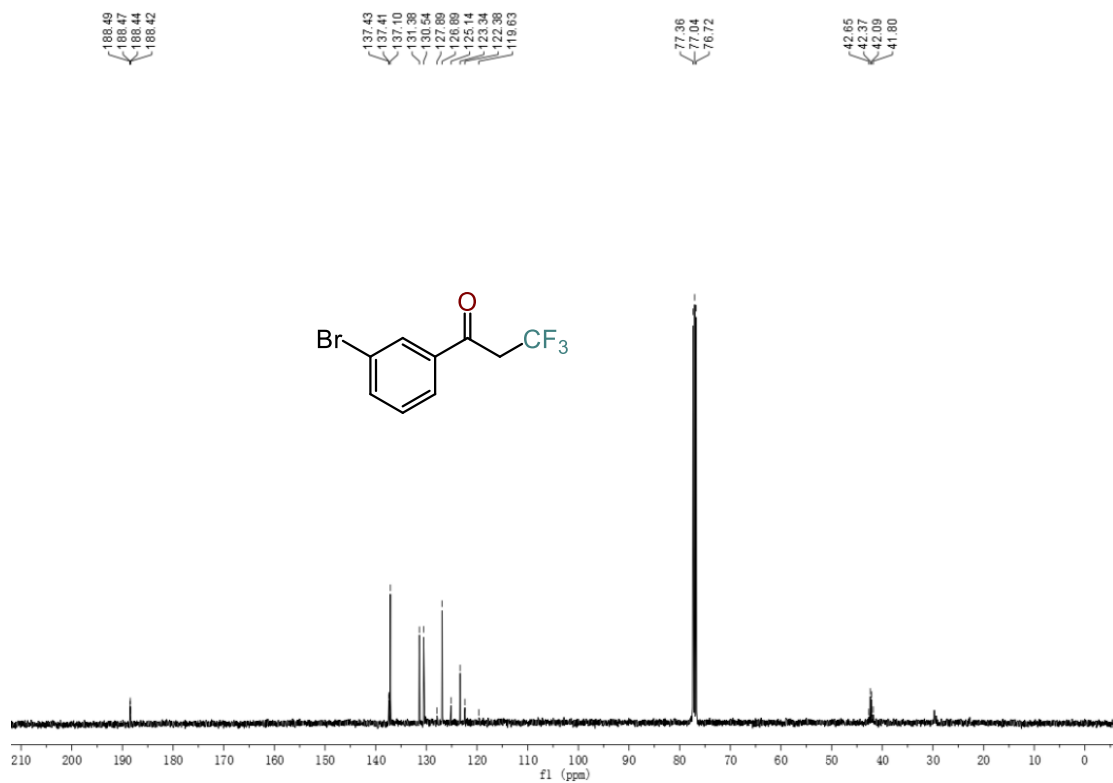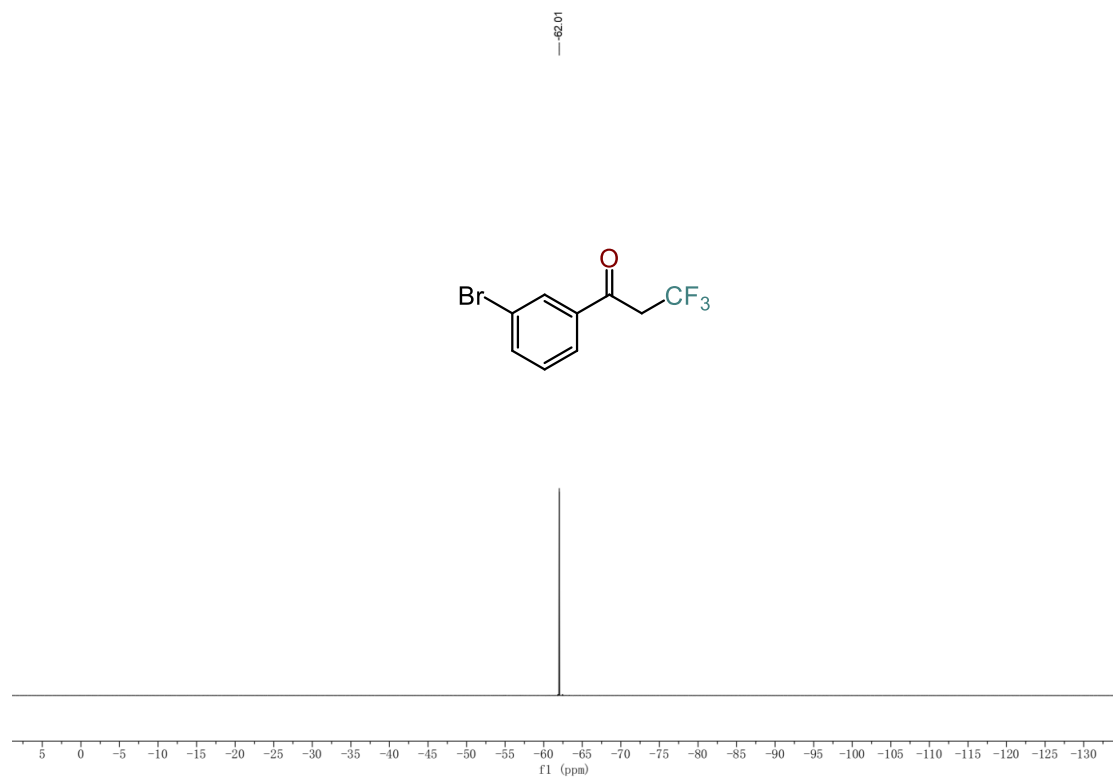

**<sup>1</sup>H NMR (400 MHz, CDCl<sub>3</sub>), <sup>13</sup>C NMR (100 MHz, CDCl<sub>3</sub>) and <sup>19</sup>F NMR (470 MHz, CDCl<sub>3</sub>) spectra for 4q**

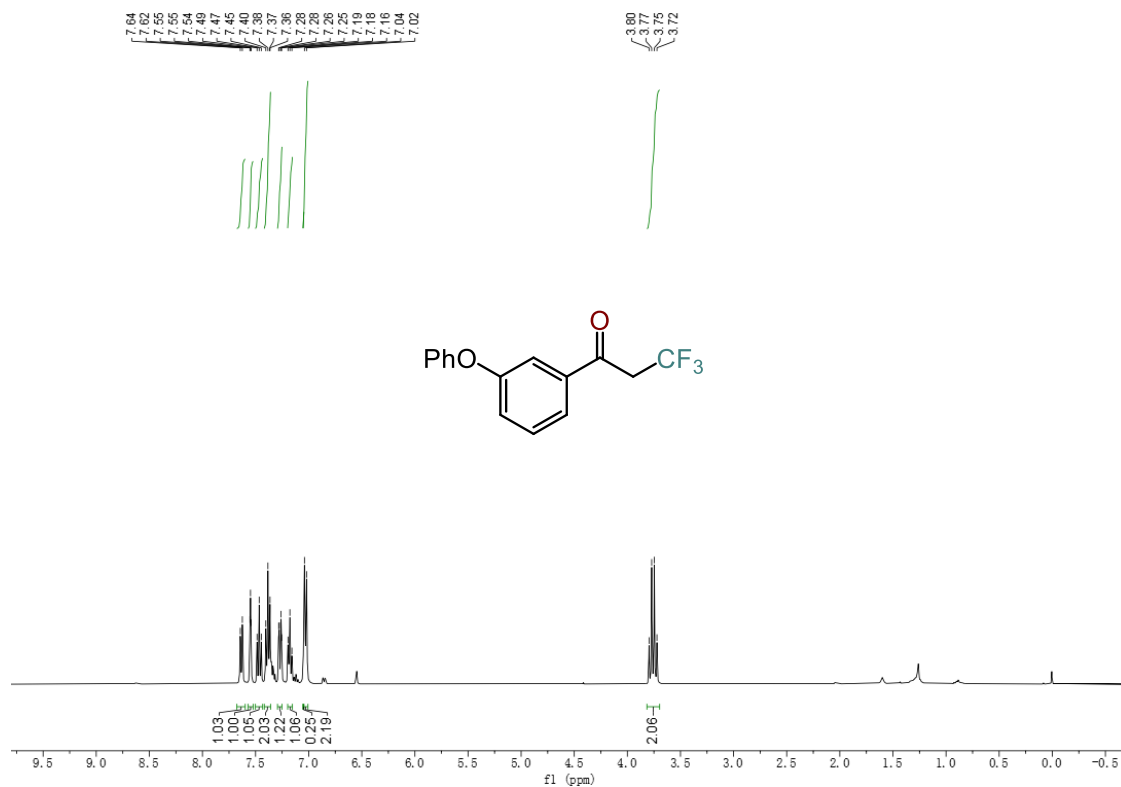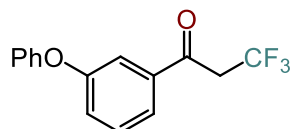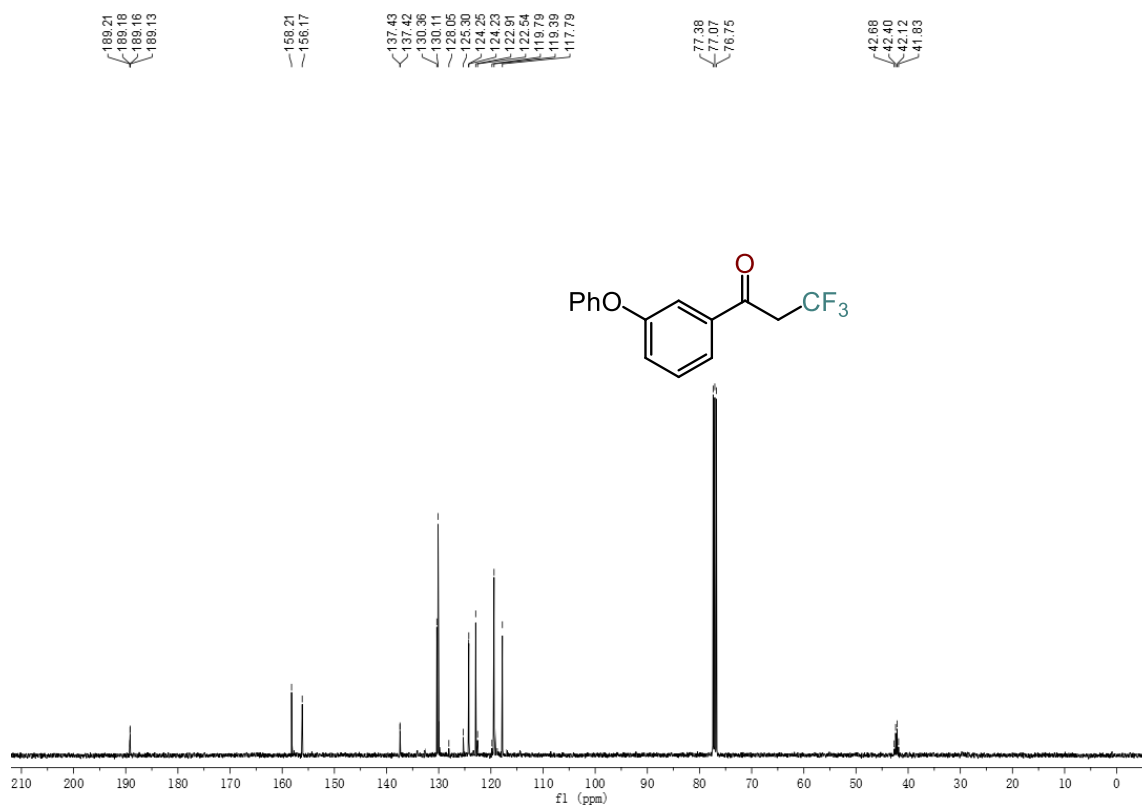

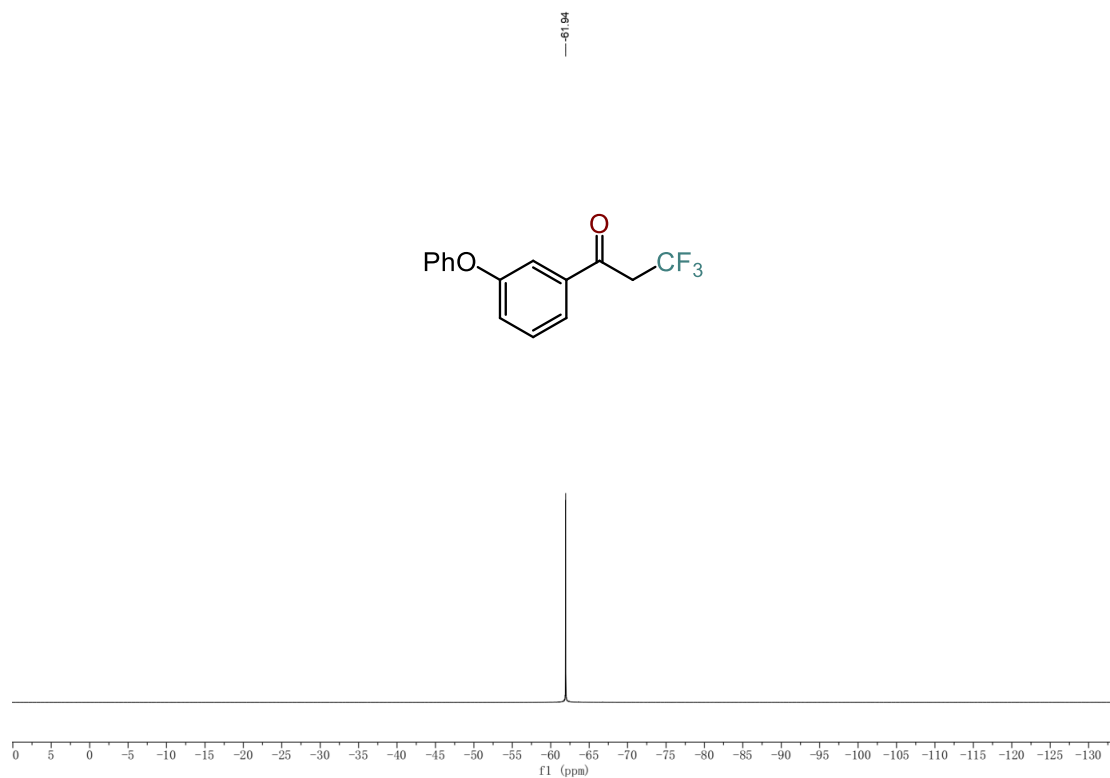

**<sup>1</sup>H NMR (400 MHz, CDCl<sub>3</sub>) and <sup>19</sup>F NMR (470 MHz, CDCl<sub>3</sub>) spectra for 4r**

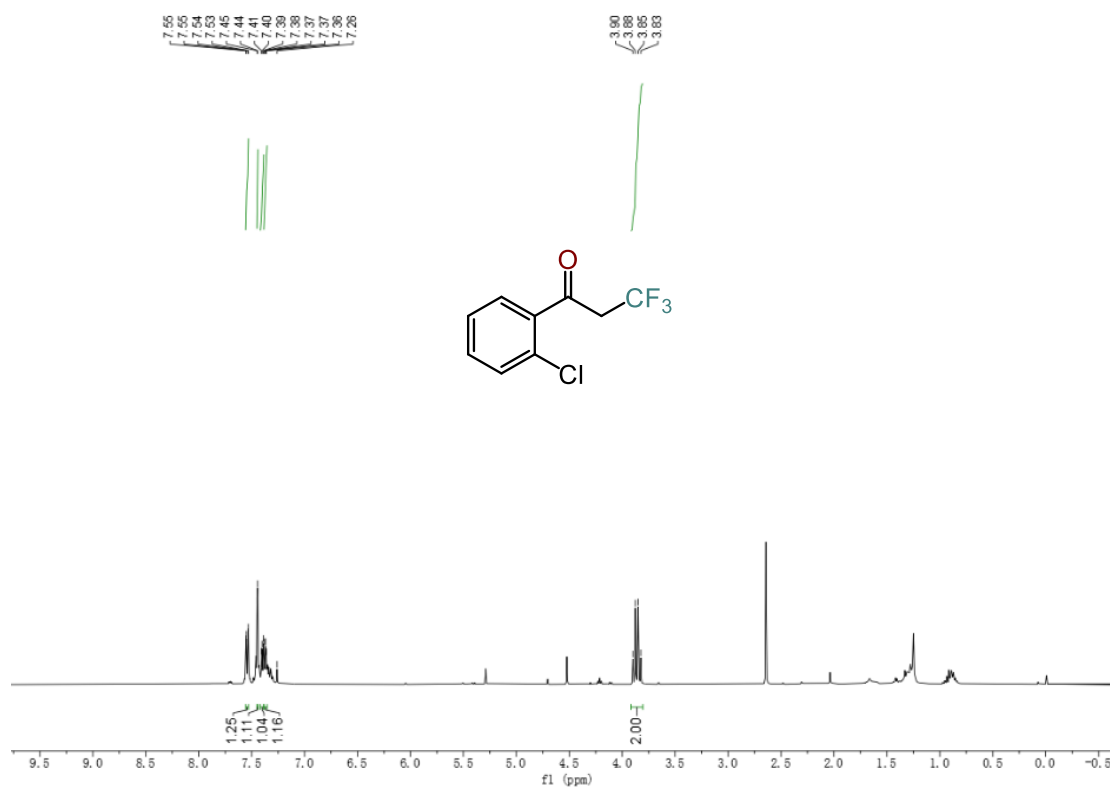

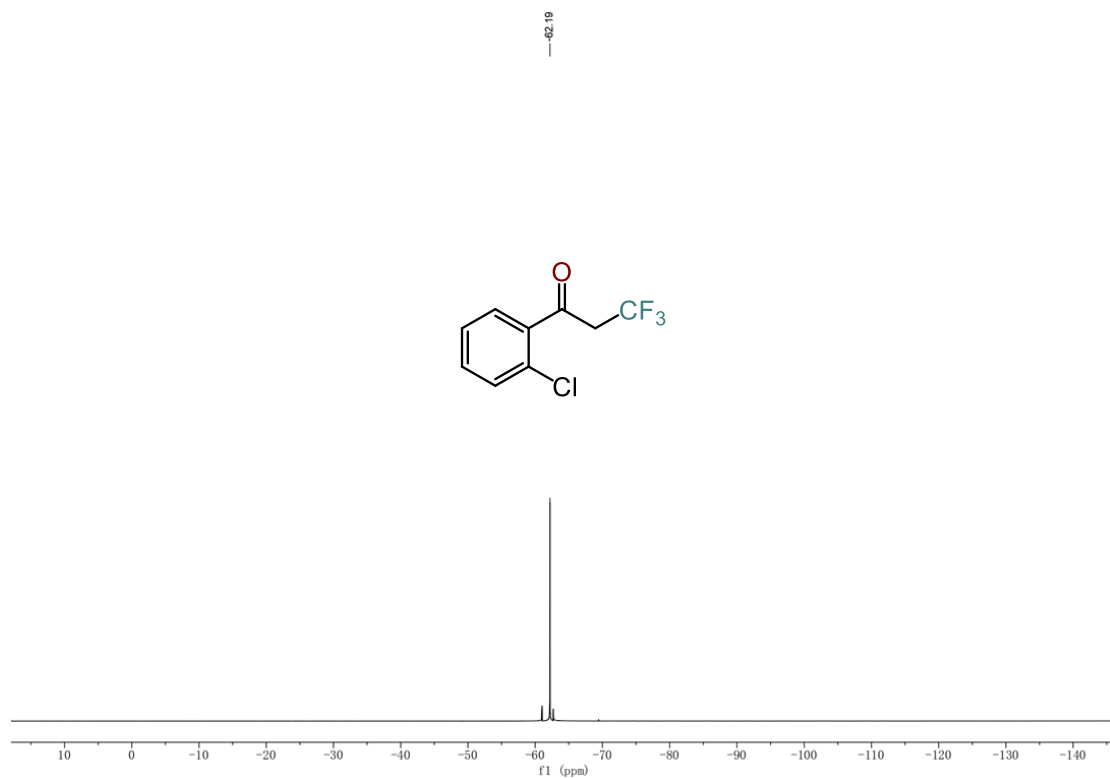

**<sup>1</sup>H NMR (400 MHz, CDCl<sub>3</sub>), <sup>13</sup>C NMR (100 MHz, CDCl<sub>3</sub>) and <sup>19</sup>F NMR (470 MHz, CDCl<sub>3</sub>) spectra for 4s**

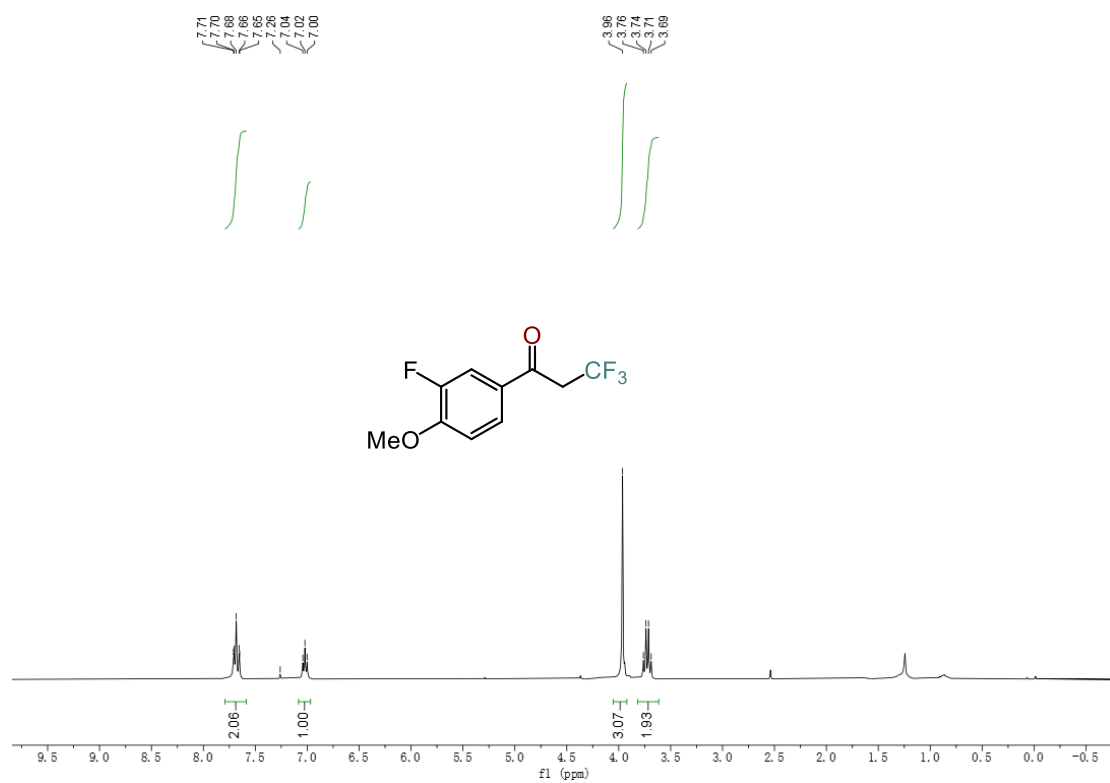

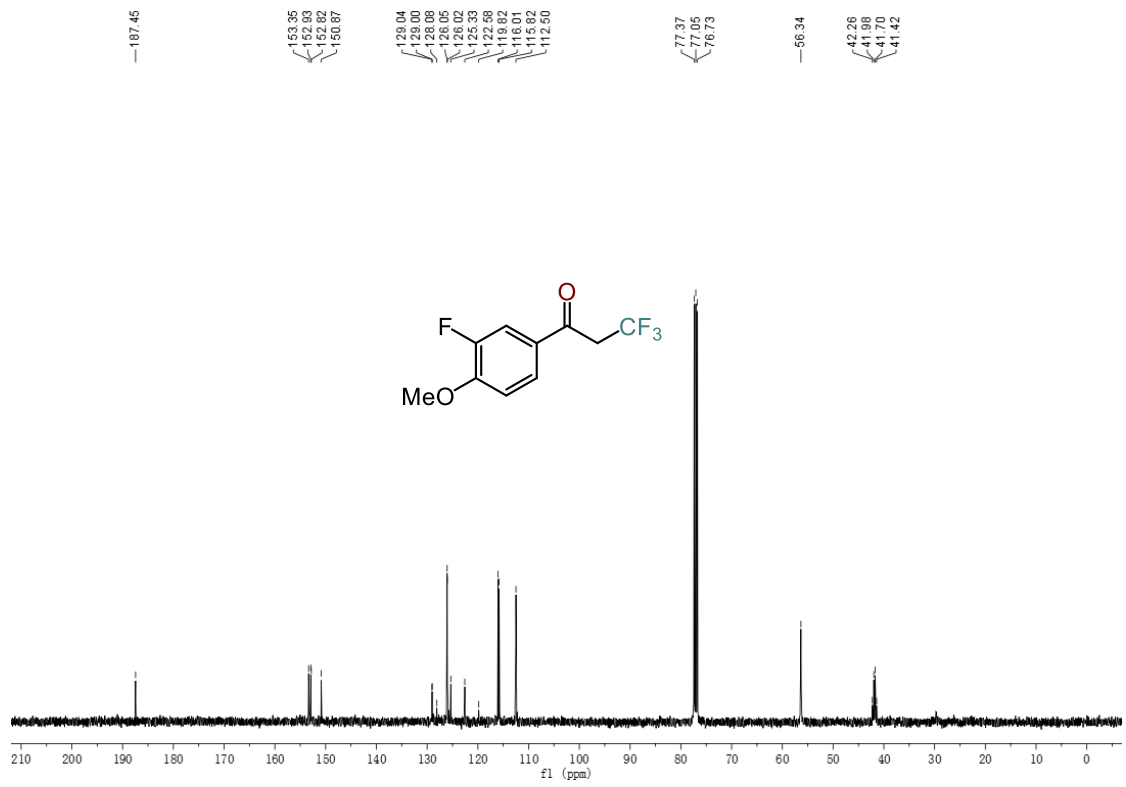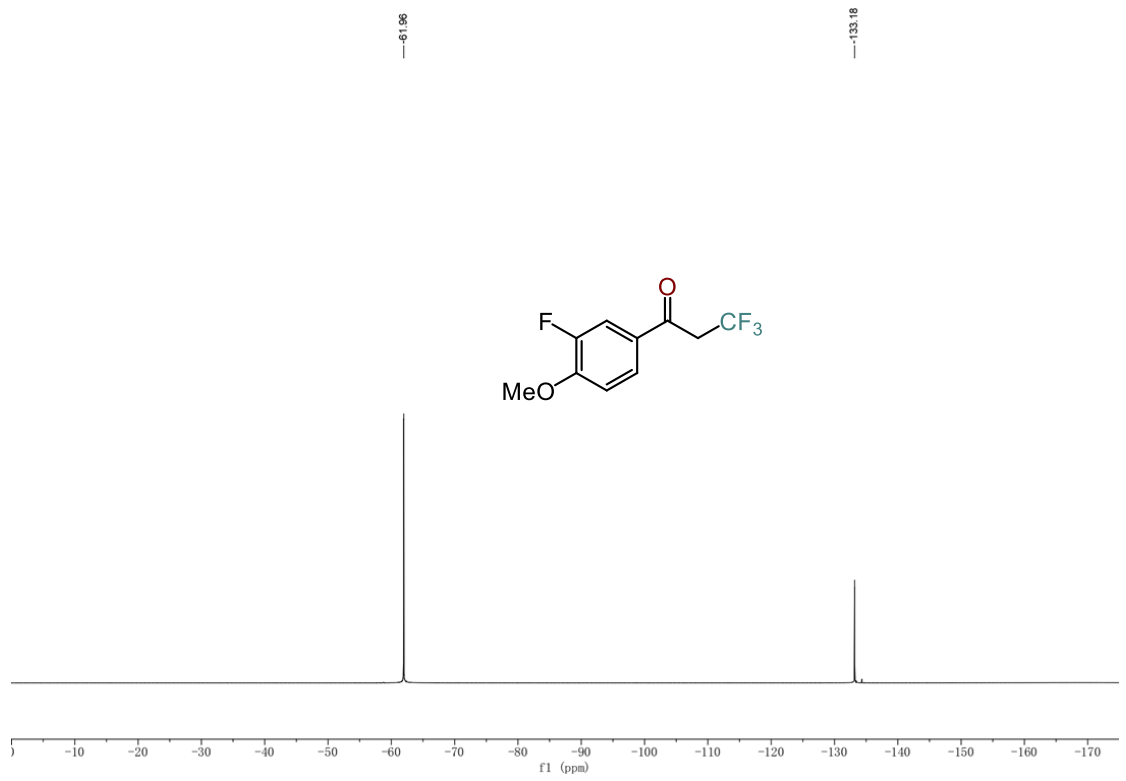

**<sup>1</sup>H NMR (400 MHz, CDCl<sub>3</sub>), <sup>13</sup>C NMR (100 MHz, CDCl<sub>3</sub>) and <sup>19</sup>F NMR (470 MHz, CDCl<sub>3</sub>) spectra for 4t**

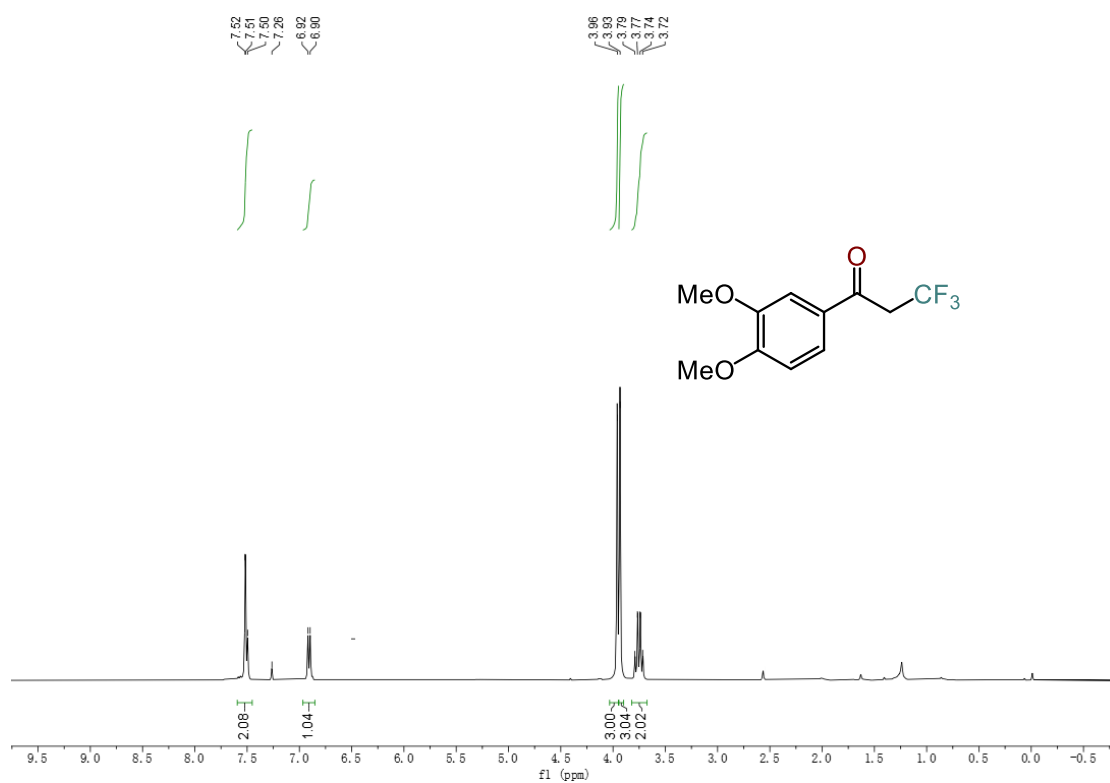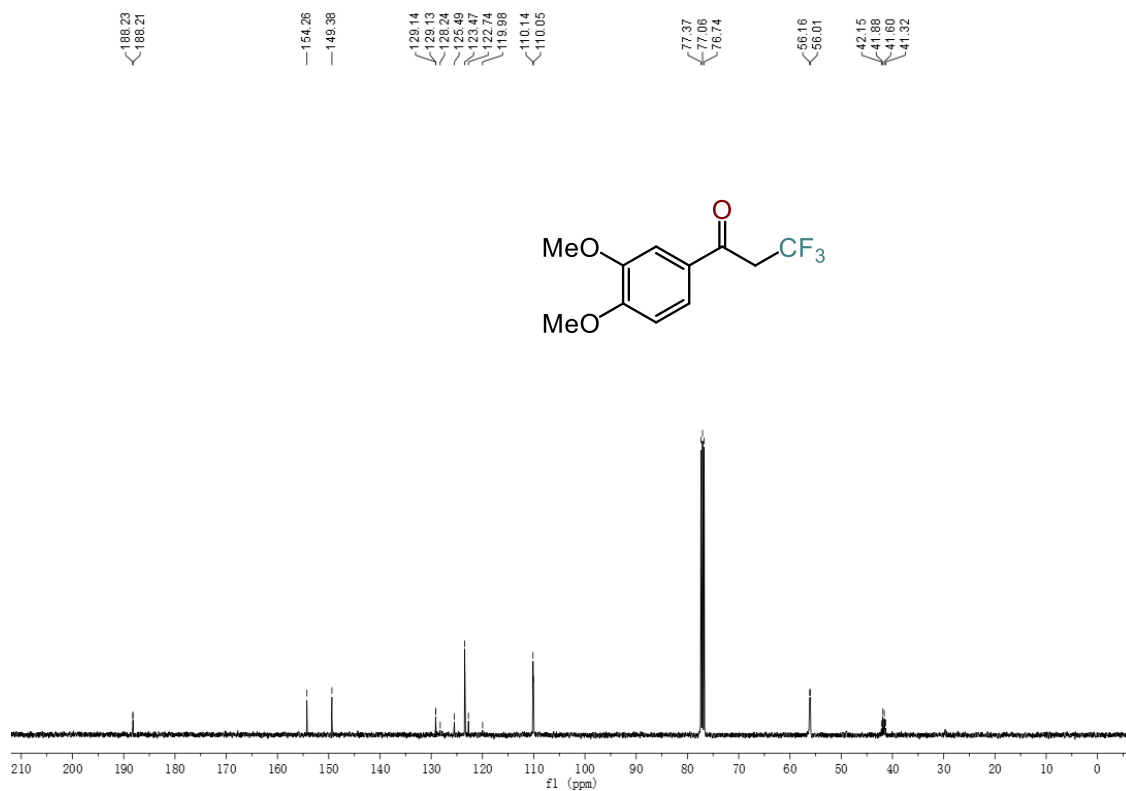

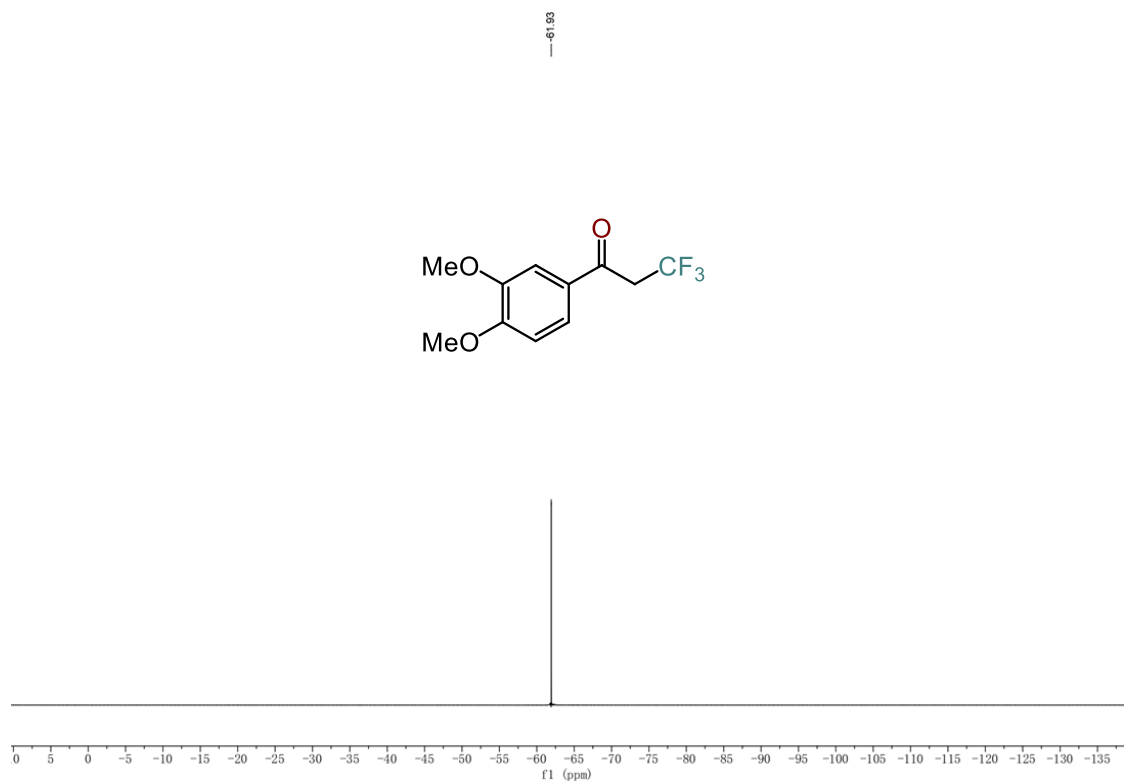

**<sup>1</sup>H NMR (400 MHz, CDCl<sub>3</sub>), <sup>13</sup>C NMR (100 MHz, CDCl<sub>3</sub>) and <sup>19</sup>F NMR (470 MHz, CDCl<sub>3</sub>) spectra for 4u**

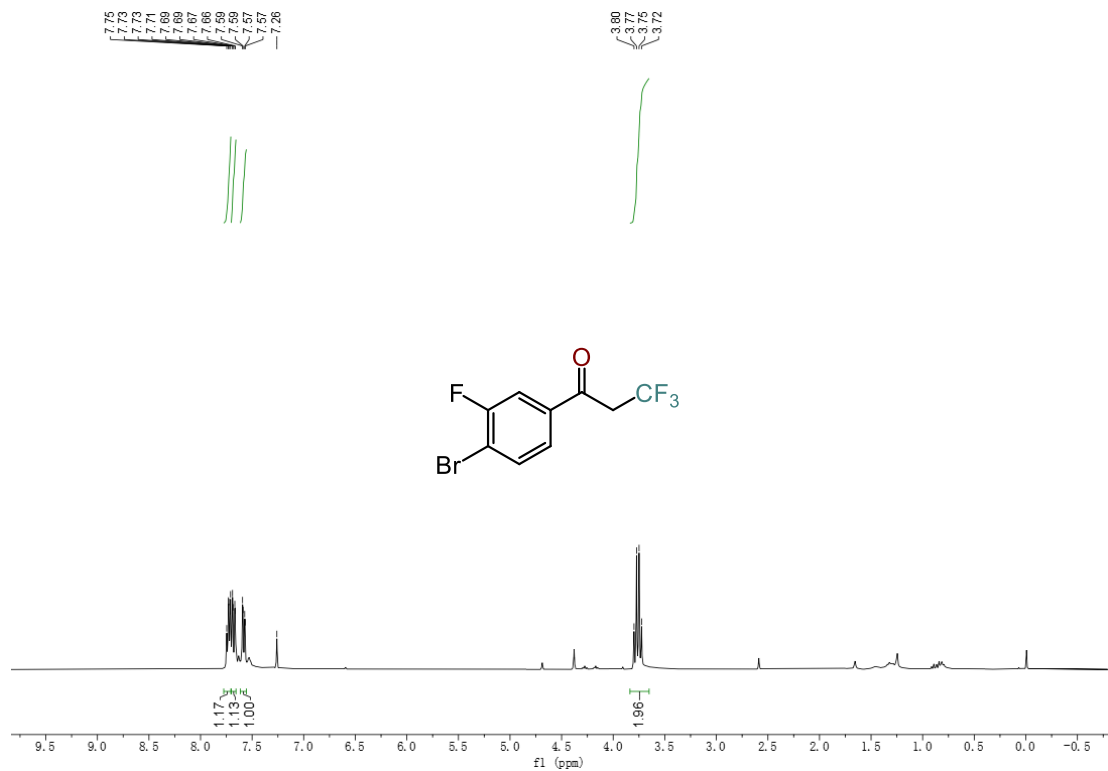

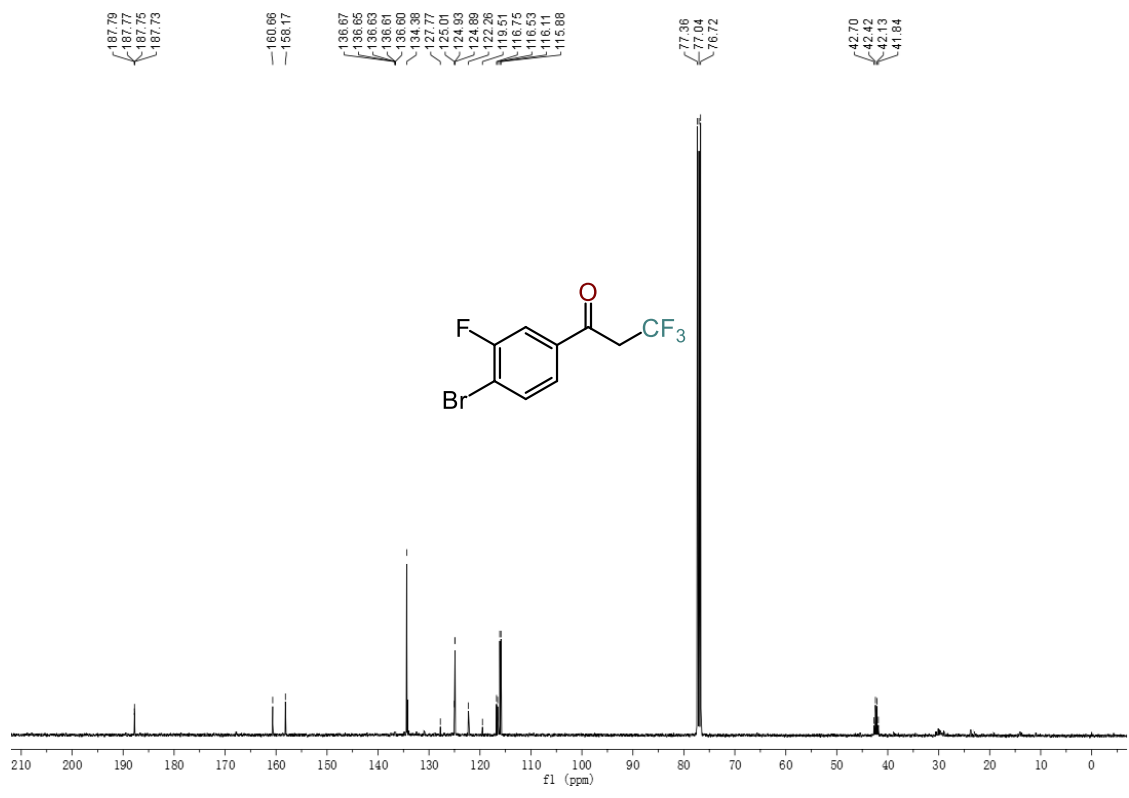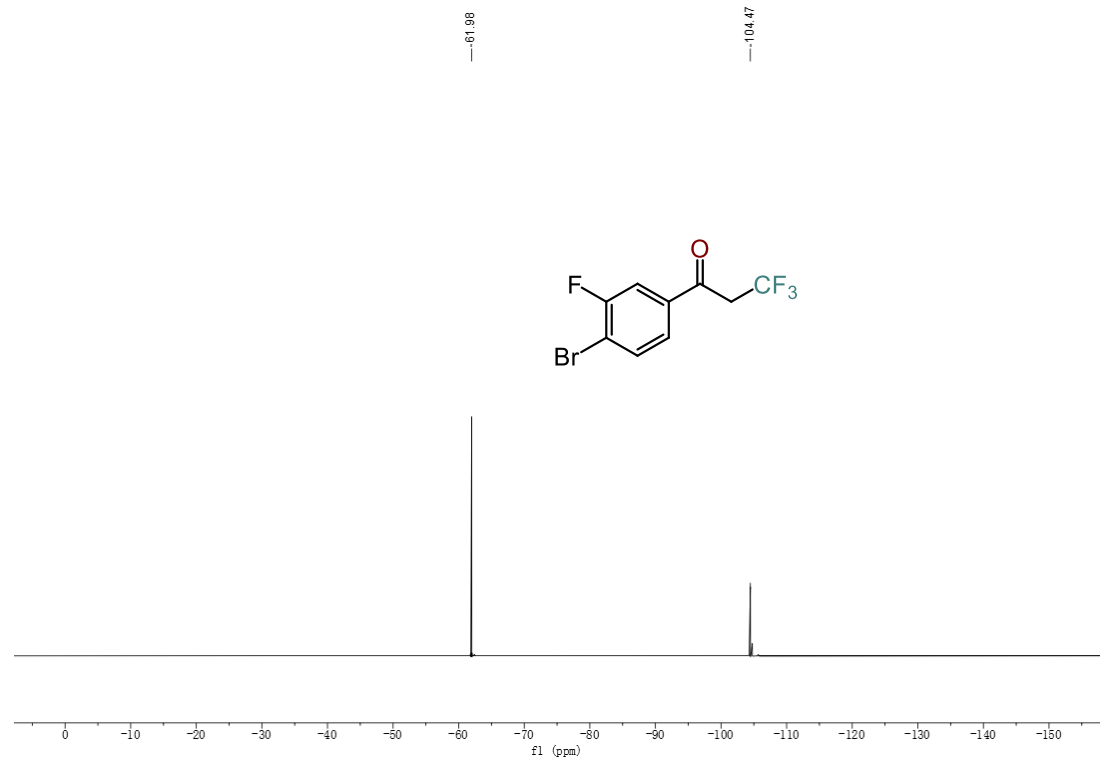

**<sup>1</sup>H NMR (400 MHz, CDCl<sub>3</sub>), <sup>13</sup>C NMR (100 MHz, CDCl<sub>3</sub>) and <sup>19</sup>F NMR (470 MHz, CDCl<sub>3</sub>) spectra for 4v**

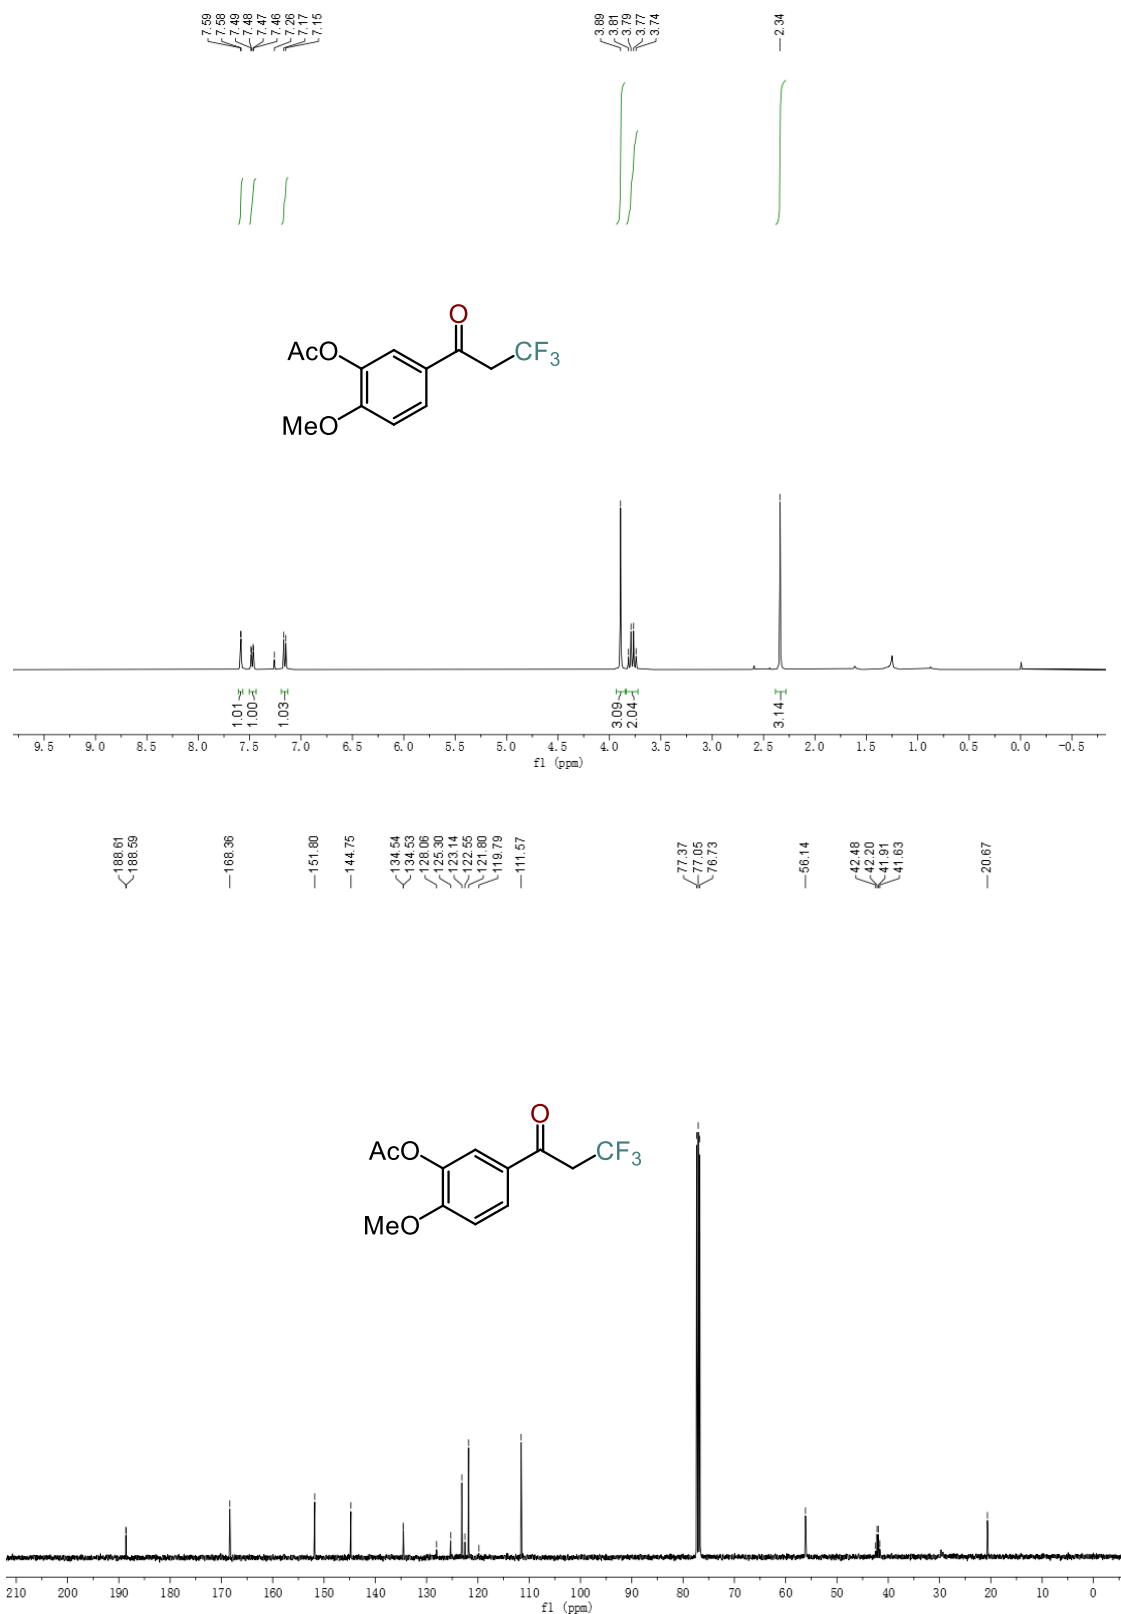

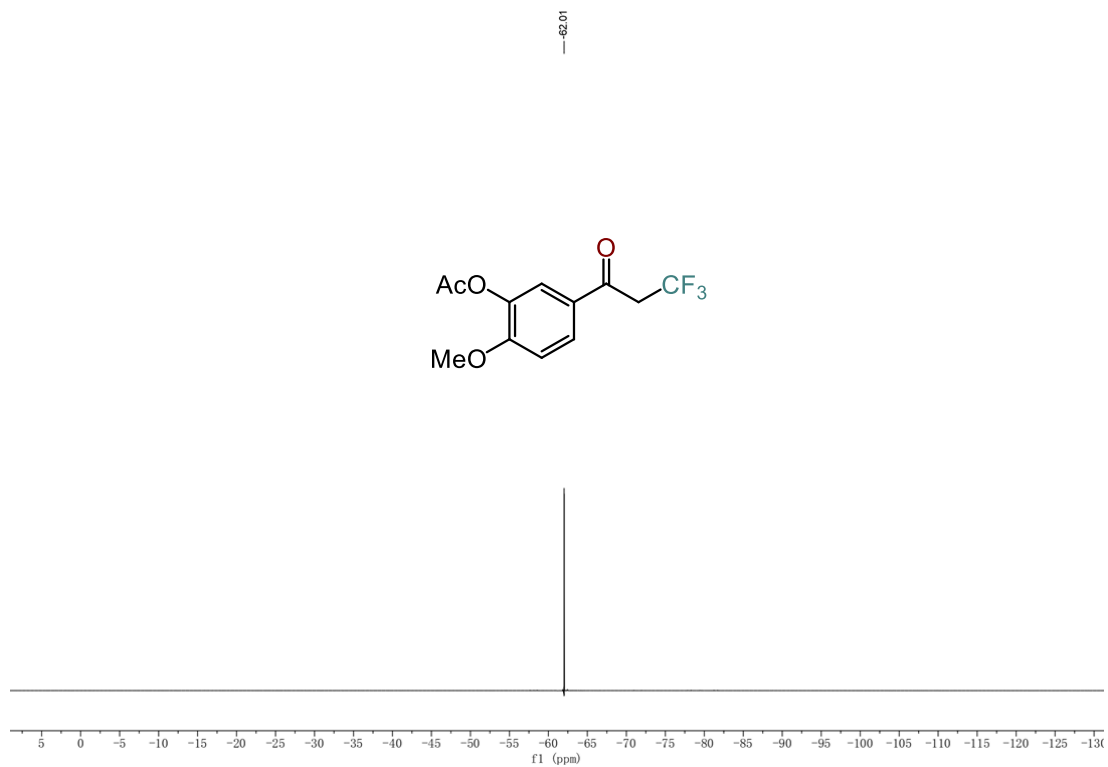

**<sup>1</sup>H NMR (400 MHz, CDCl<sub>3</sub>), <sup>13</sup>C NMR (100 MHz, CDCl<sub>3</sub>) and <sup>19</sup>F NMR (470 MHz, CDCl<sub>3</sub>) spectra for 4w**

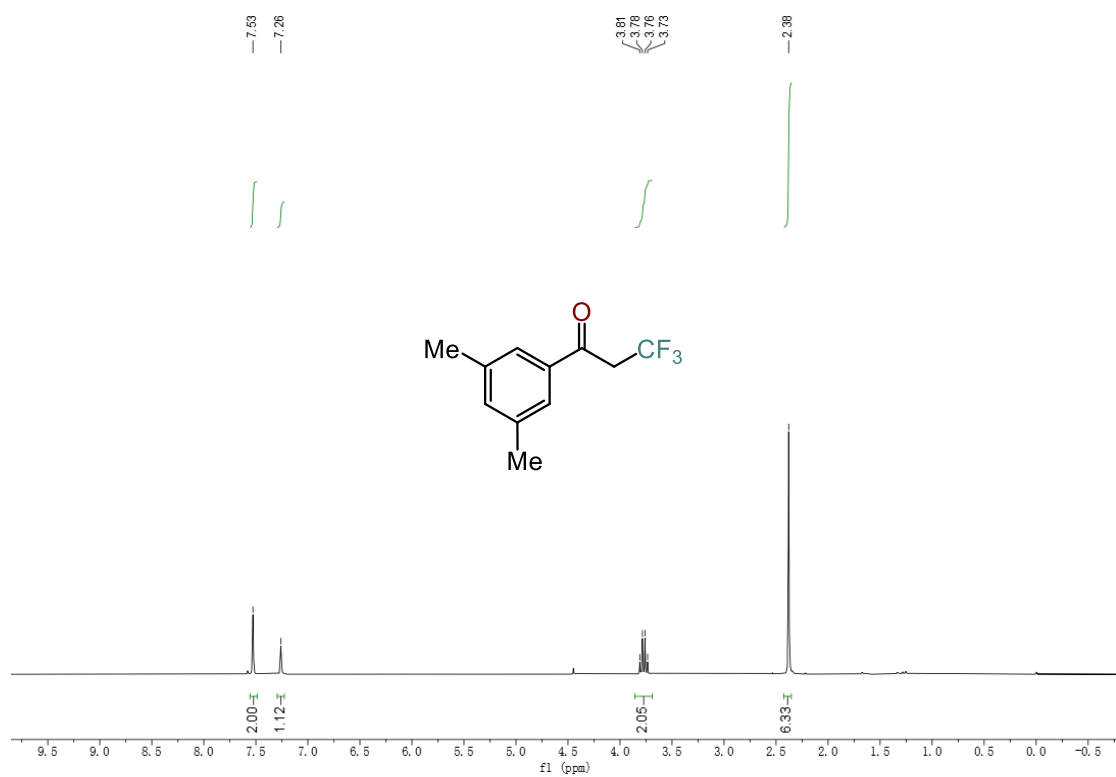

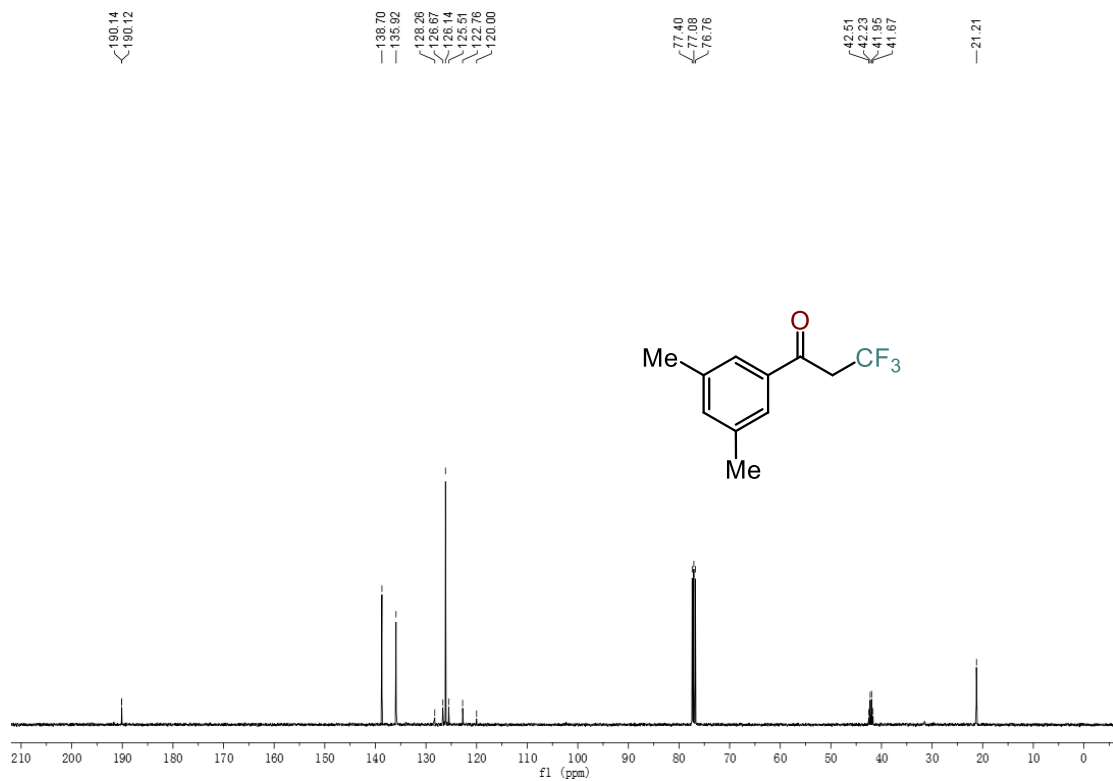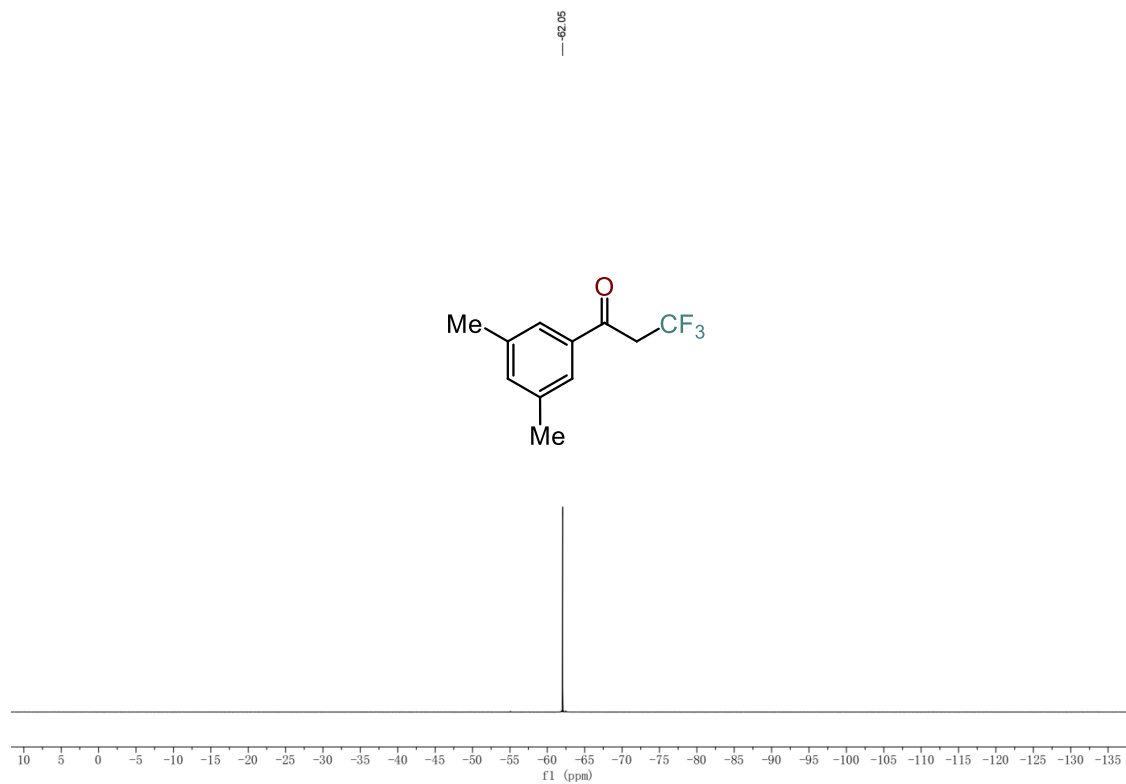

**<sup>1</sup>H NMR (400 MHz, CDCl<sub>3</sub>), <sup>13</sup>C NMR (100 MHz, CDCl<sub>3</sub>) and <sup>19</sup>F NMR (470 MHz, CDCl<sub>3</sub>) spectra for 4x**

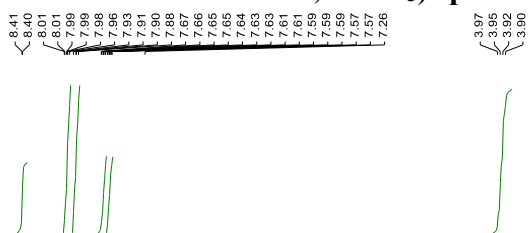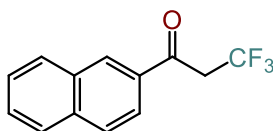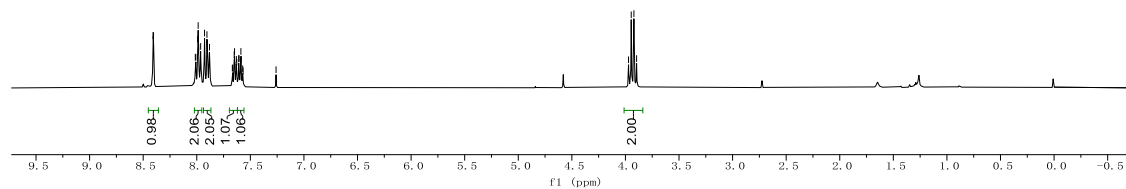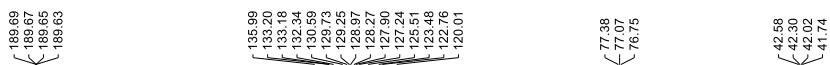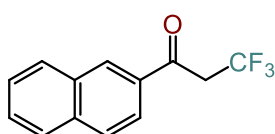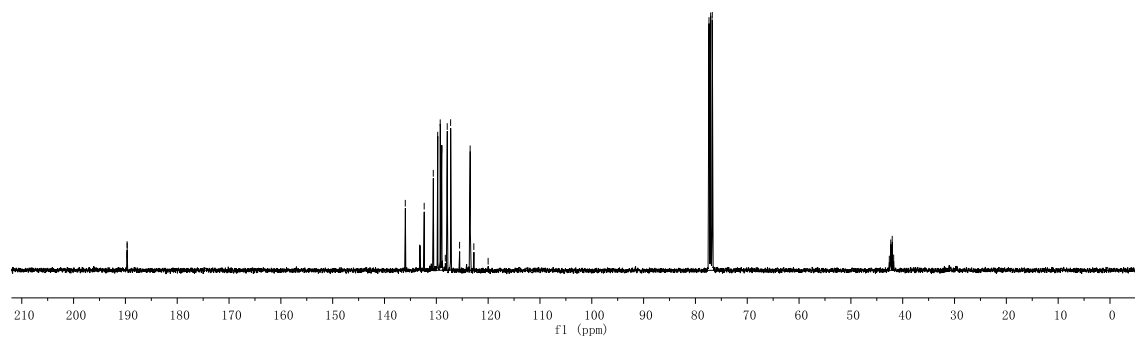

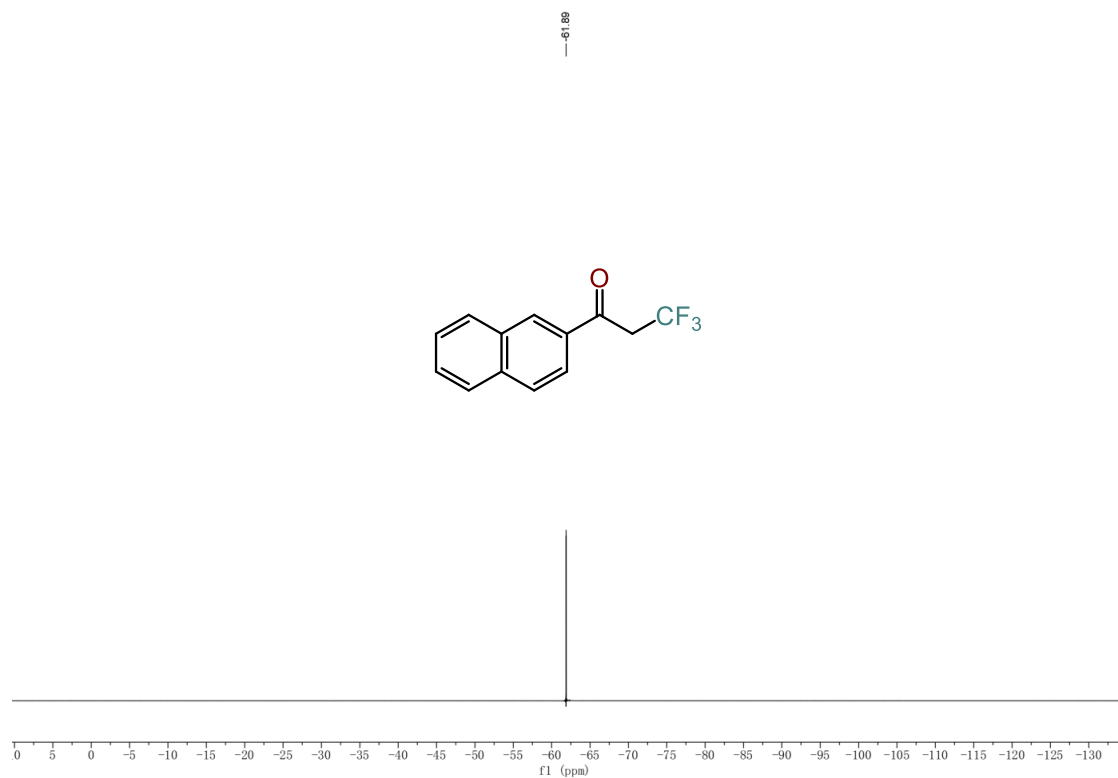

**$^1\text{H}$  NMR (400 MHz,  $\text{CDCl}_3$ ),  $^{13}\text{C}$  NMR (100 MHz,  $\text{CDCl}_3$ ) and  $^{19}\text{F}$  NMR (470 MHz,  $\text{CDCl}_3$ ) spectra for 4y**

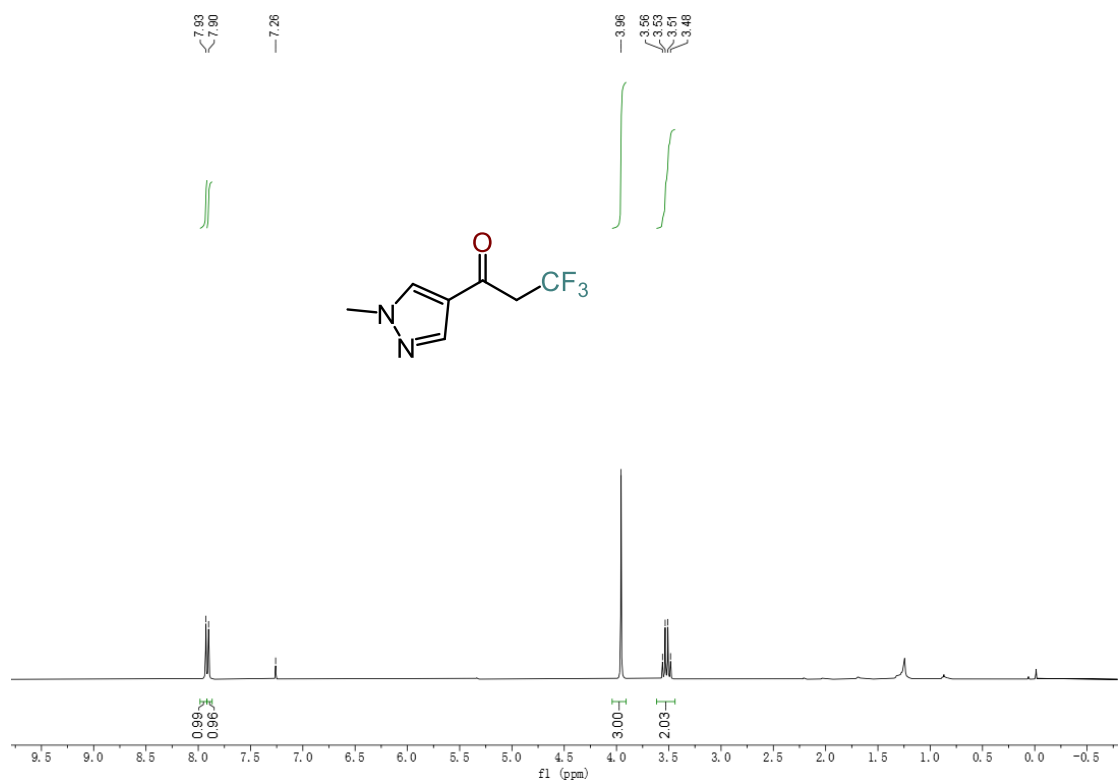

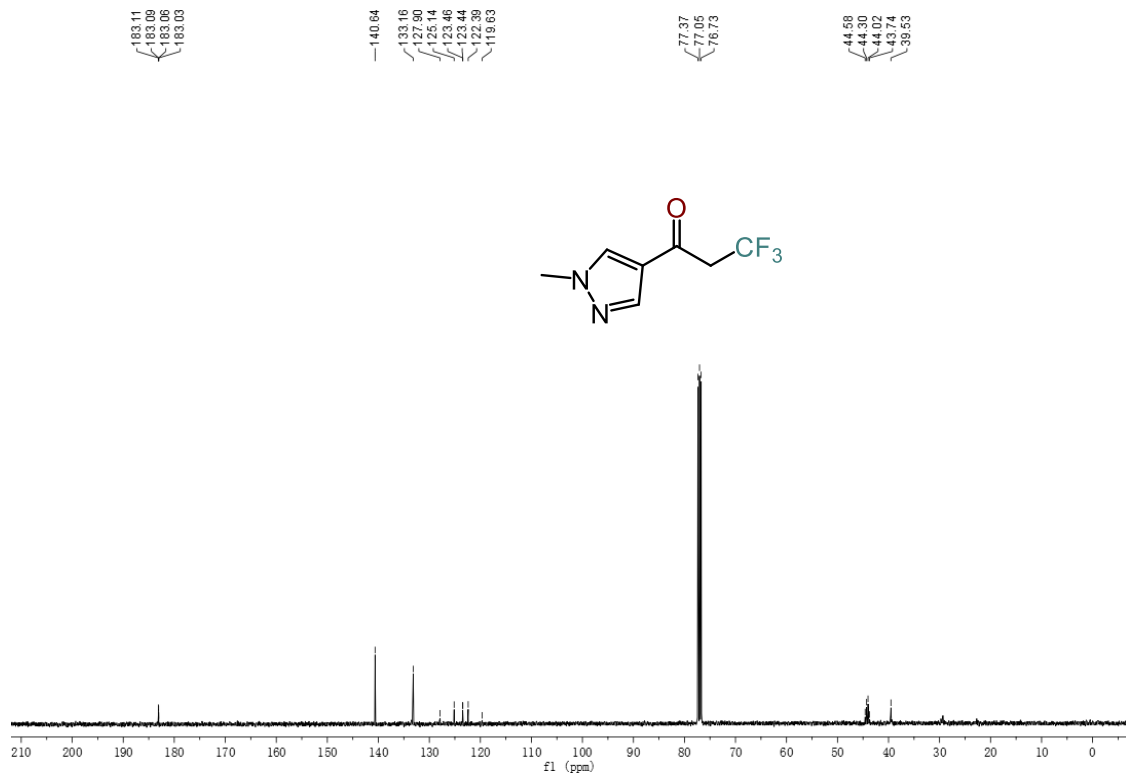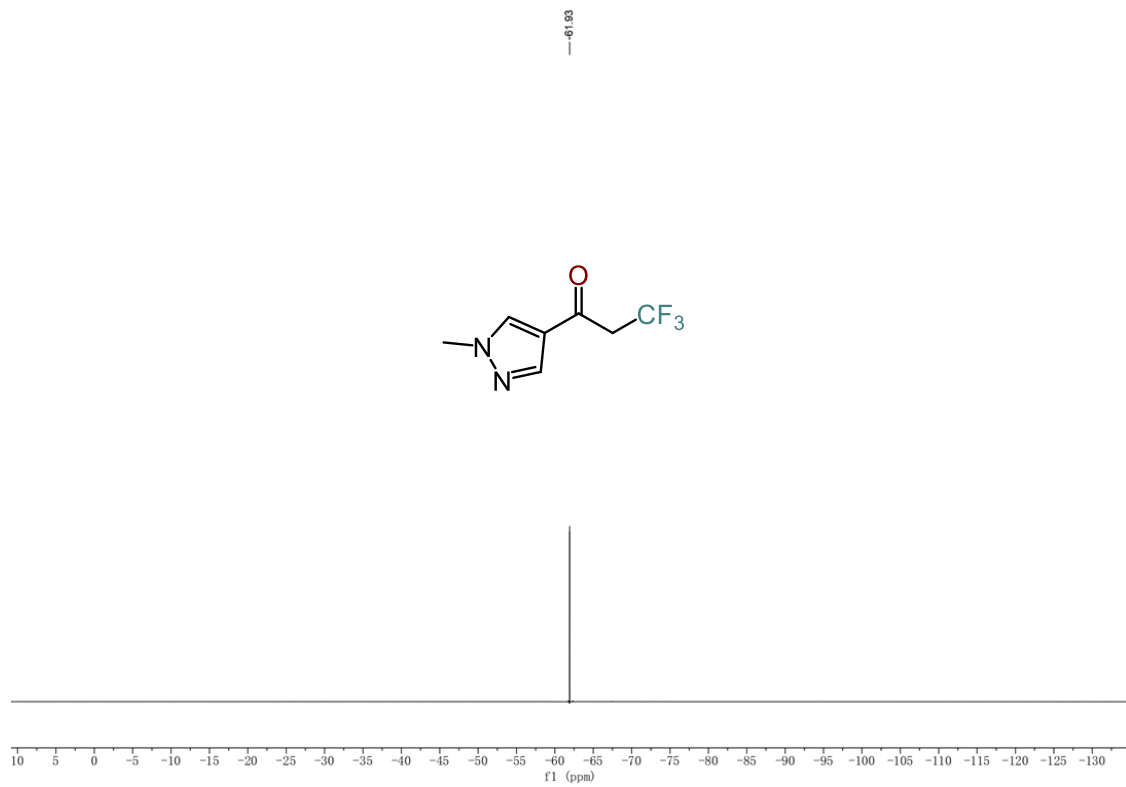

**<sup>1</sup>H NMR (400 MHz, CDCl<sub>3</sub>), <sup>13</sup>C NMR (100 MHz, CDCl<sub>3</sub>) and <sup>19</sup>F NMR (470 MHz, CDCl<sub>3</sub>) spectra for 4z**

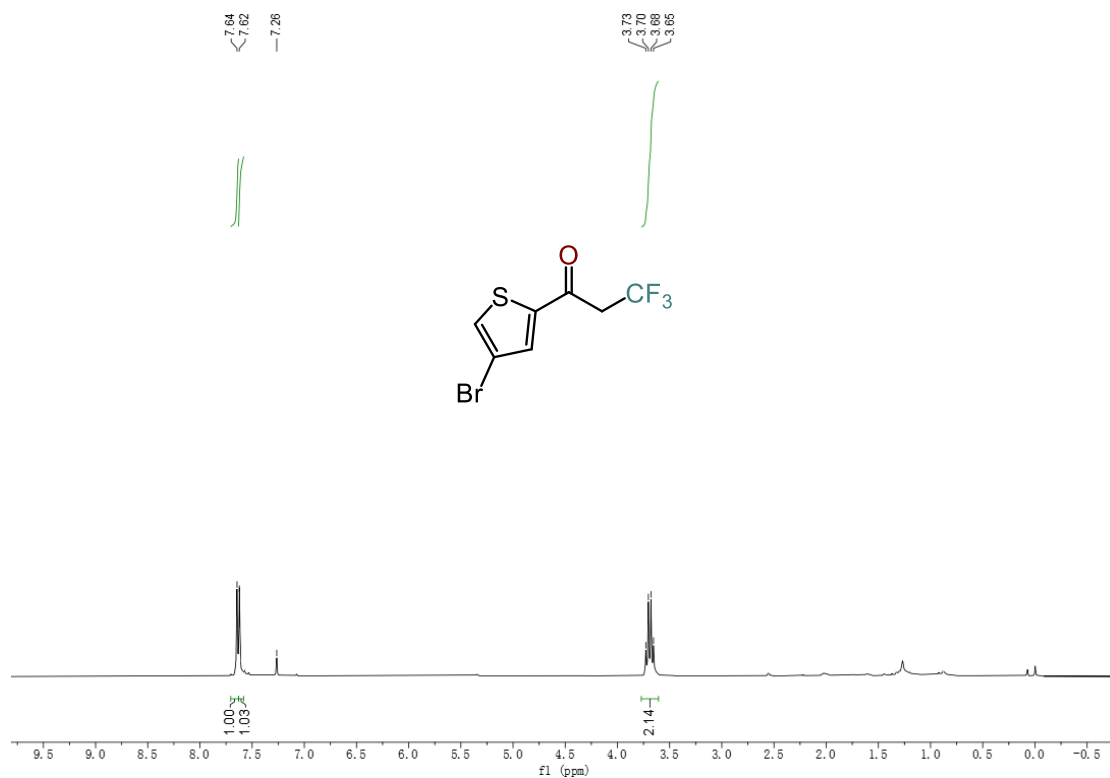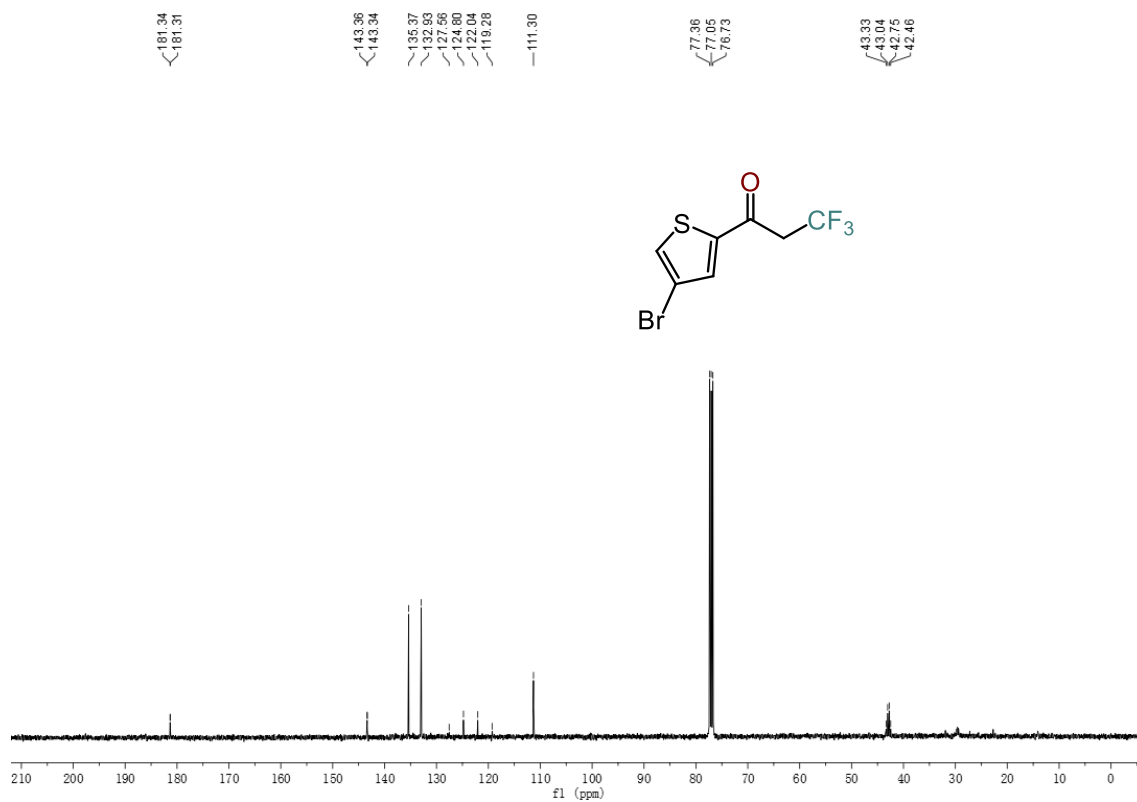

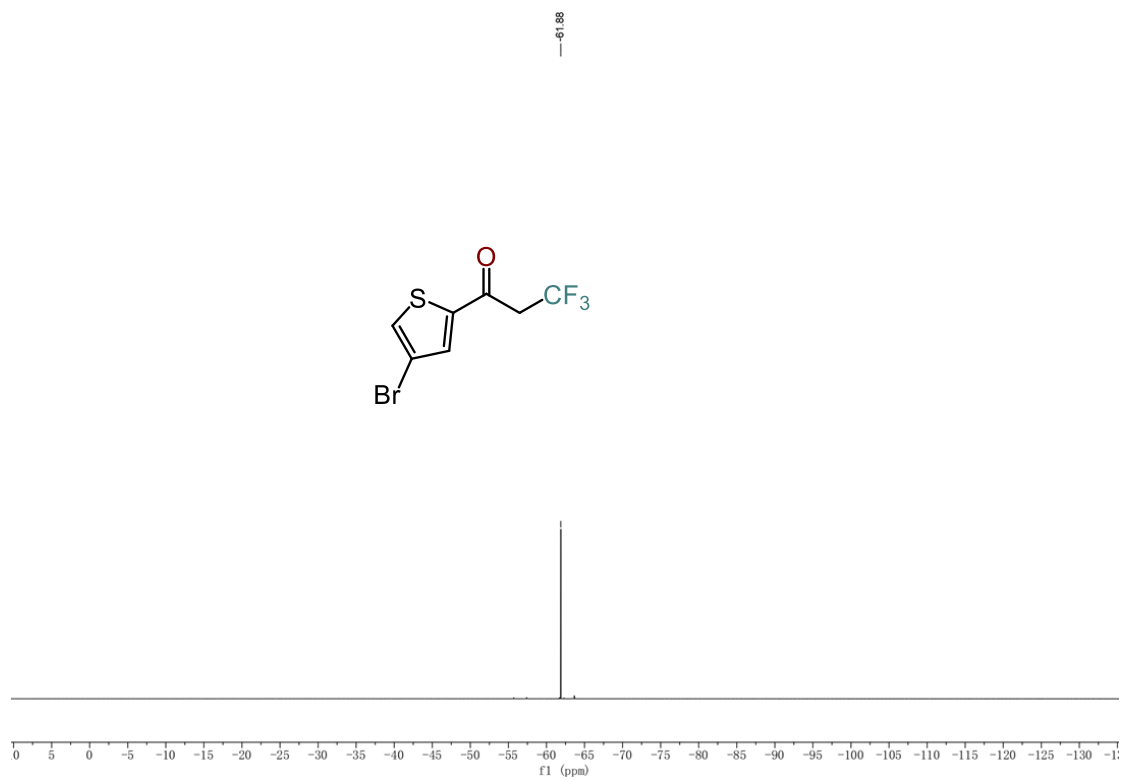

**$^1\text{H}$  NMR (400 MHz,  $\text{CDCl}_3$ ),  $^{13}\text{C}$  NMR (100 MHz,  $\text{CDCl}_3$ ) and  $^{19}\text{F}$  NMR (470 MHz,  $\text{CDCl}_3$ ) spectra for 4A**

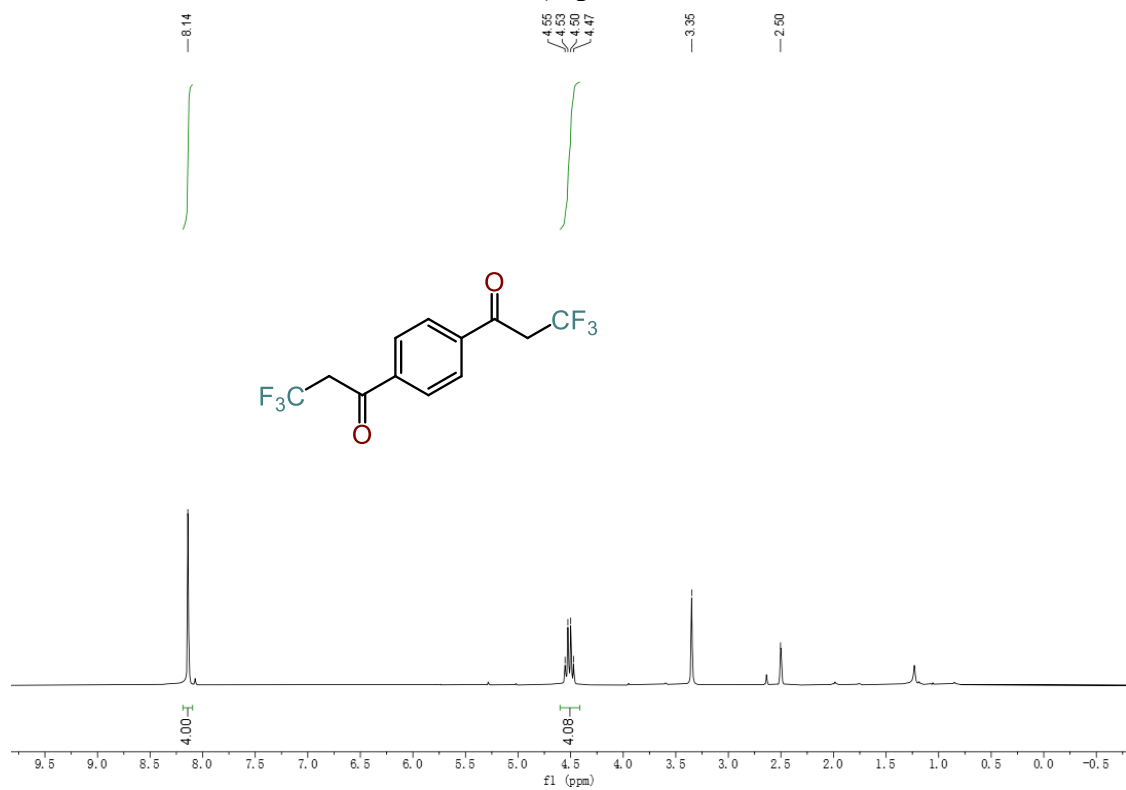

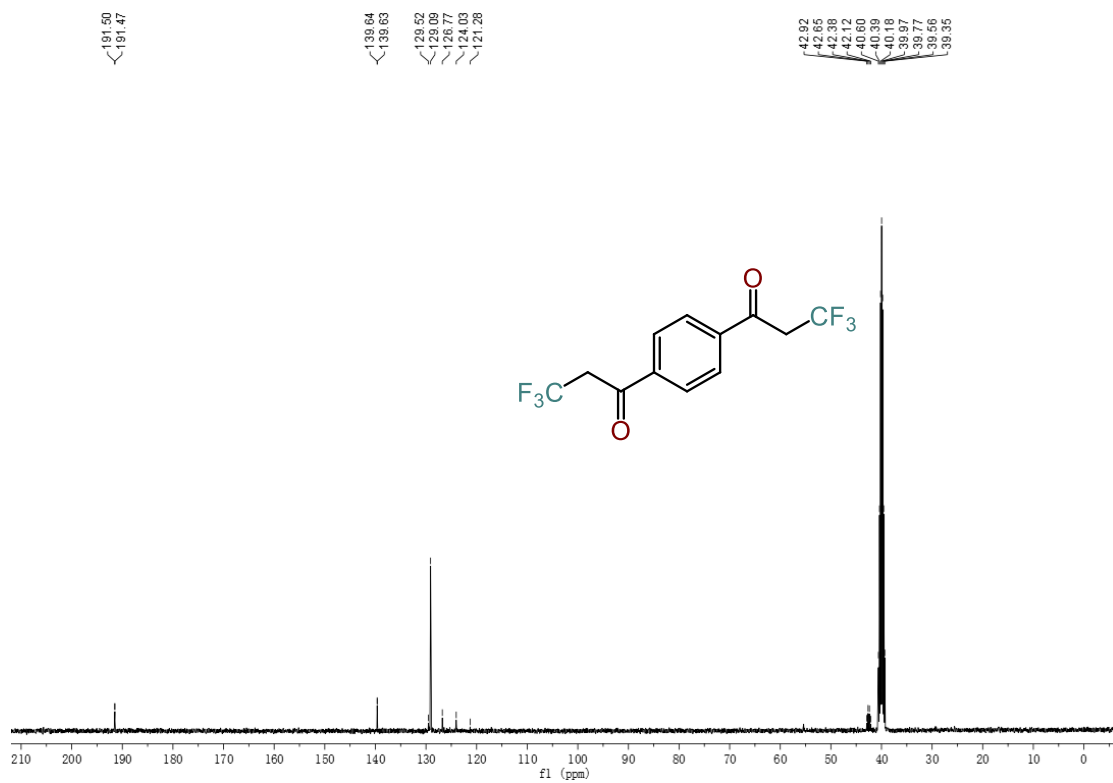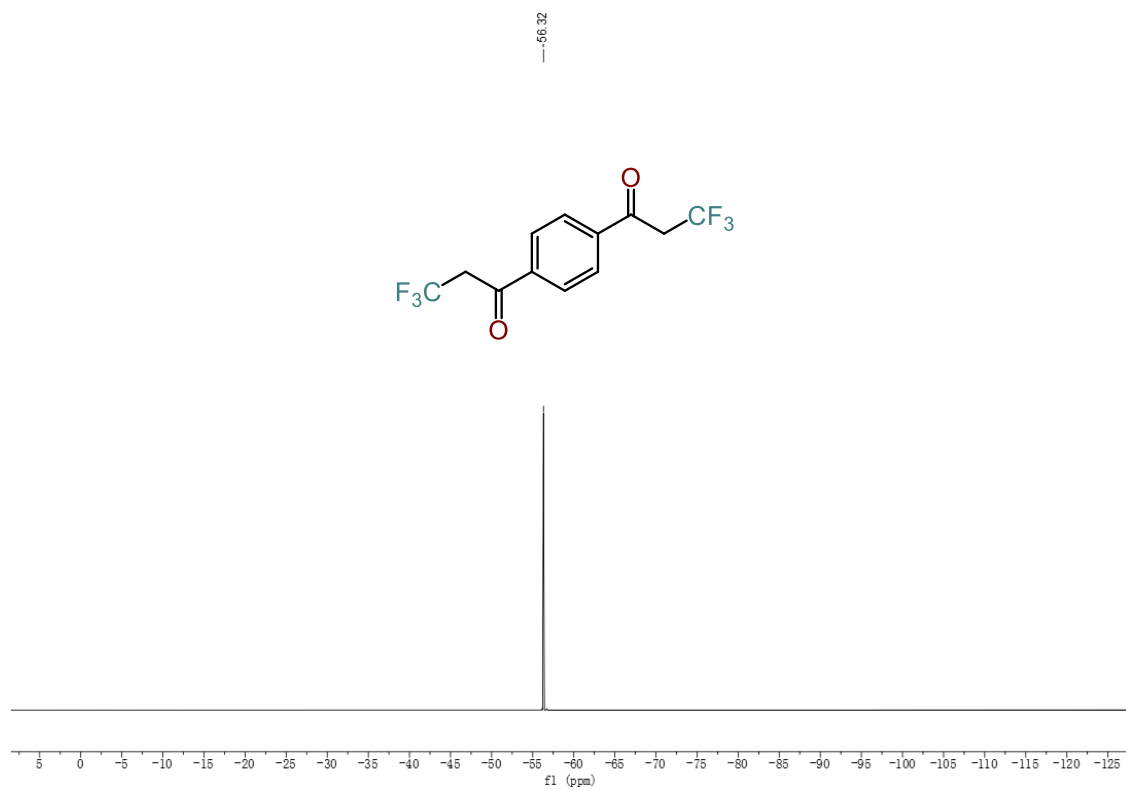

**$^1\text{H}$  NMR (400 MHz,  $\text{CDCl}_3$ ),  $^{13}\text{C}$  NMR (100 MHz,  $\text{CDCl}_3$ ) and  $^{19}\text{F}$  NMR (470 MHz,  $\text{CDCl}_3$ ) spectra for 7**

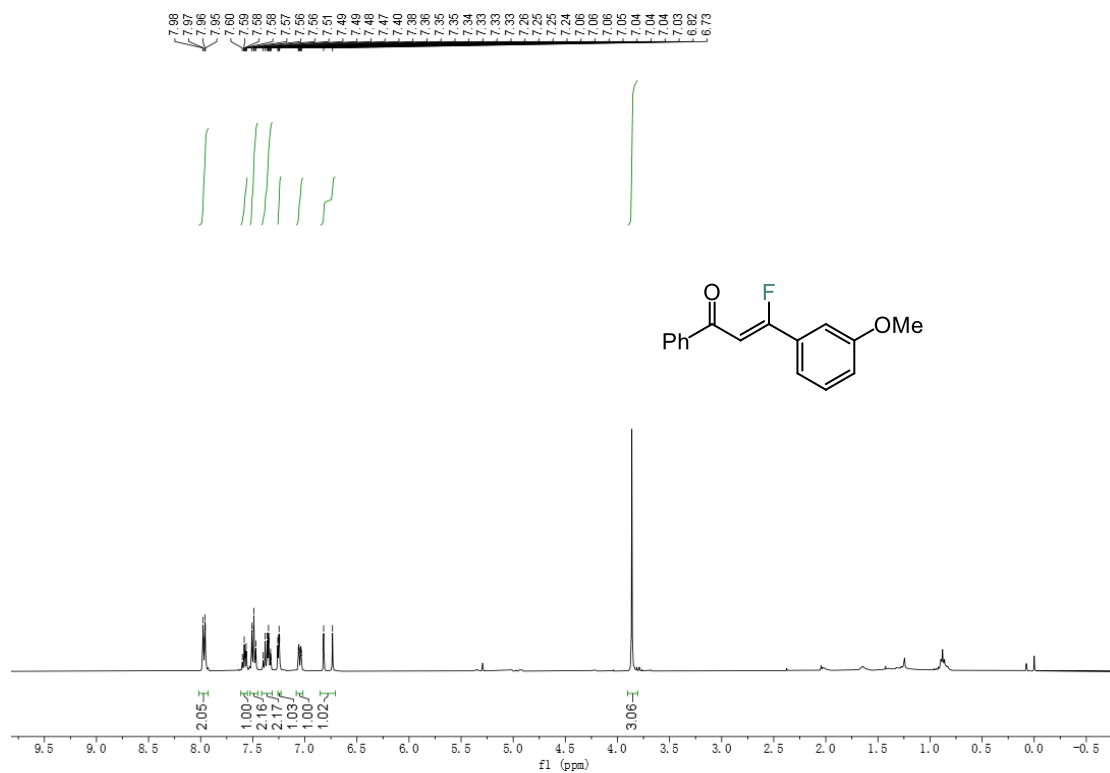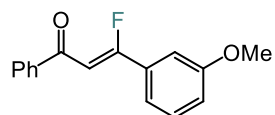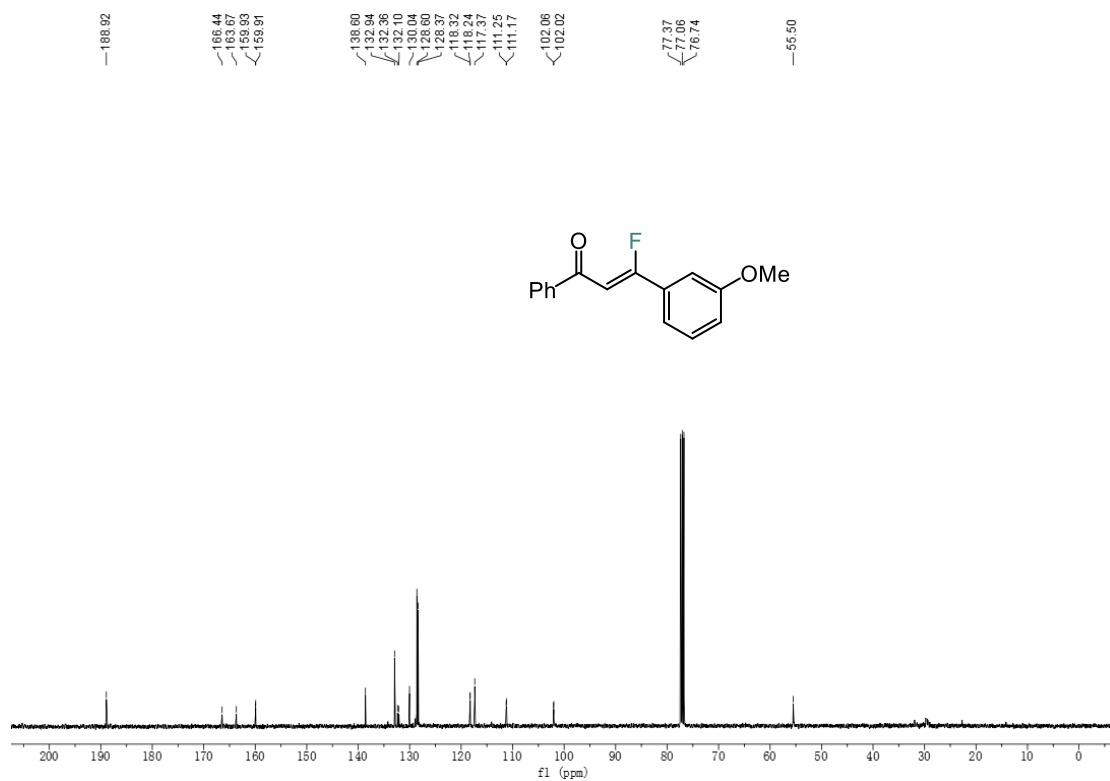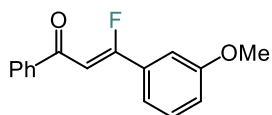

—06.08

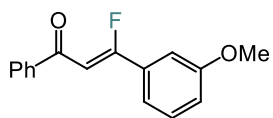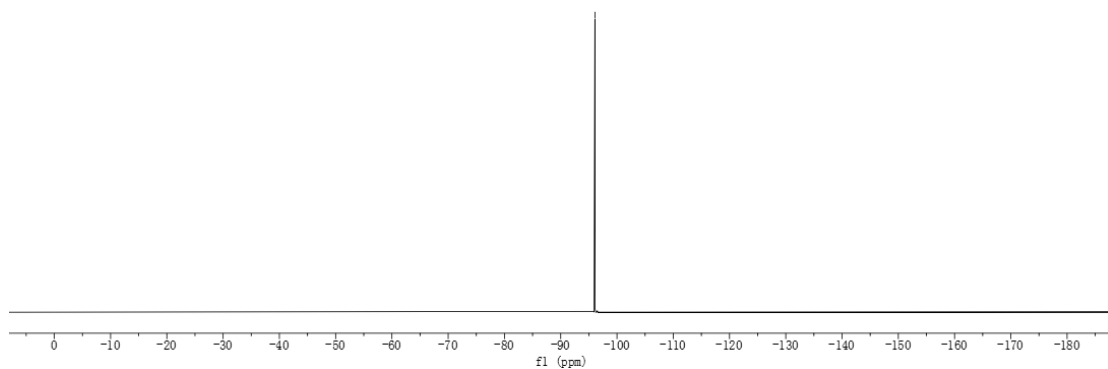

**$^1\text{H}$  NMR (400 MHz,  $\text{CDCl}_3$ ),  $^{13}\text{C}$  NMR (100 MHz,  $\text{CDCl}_3$ ) and  $^{19}\text{F}$  NMR (470 MHz,  $\text{CDCl}_3$ ) spectra for 9**

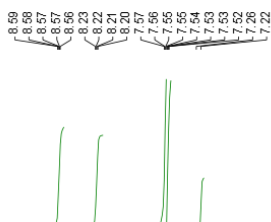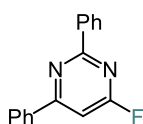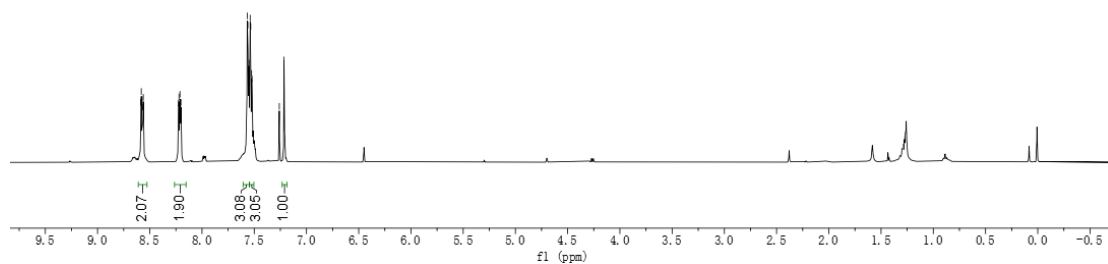

172.61  
170.13  
168.73  
168.65  
165.37

136.43  
136.16  
136.11  
131.54  
129.02  
128.05  
128.65  
128.62  
127.41  
126.32

99.79  
99.48

77.37  
77.05  
76.73

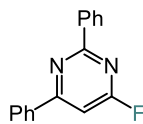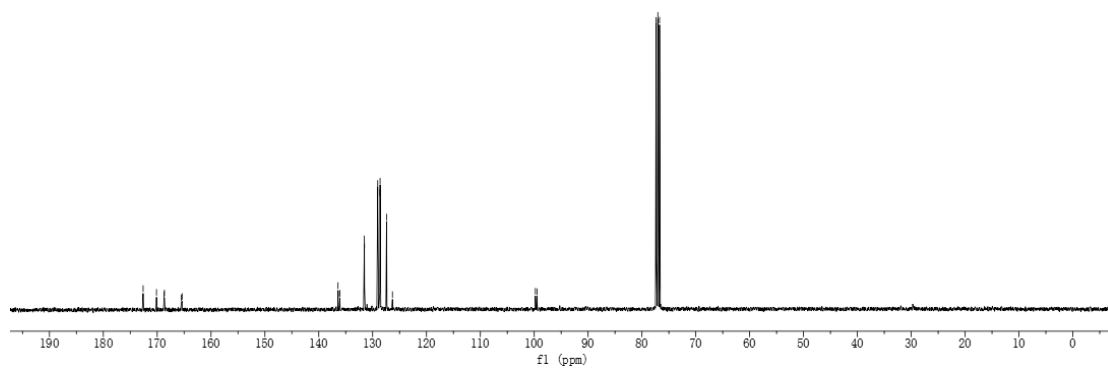

61.19

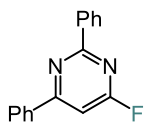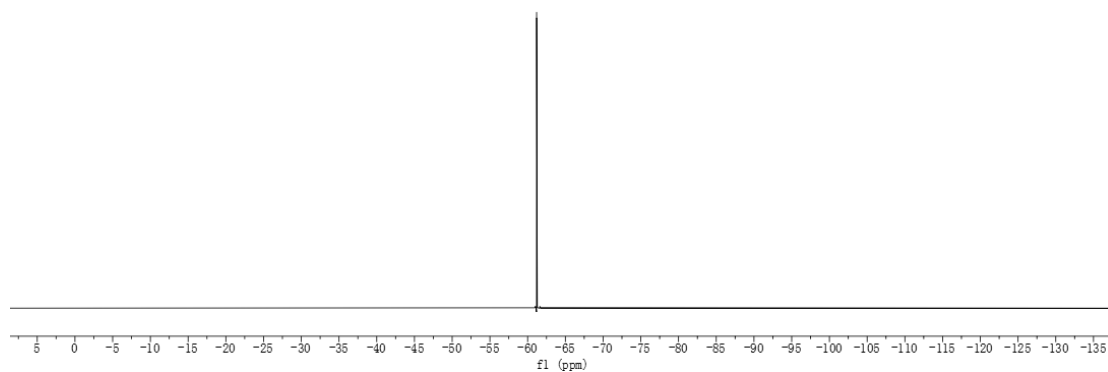

**<sup>1</sup>H NMR (400 MHz, CDCl<sub>3</sub>), <sup>13</sup>C NMR (100 MHz, CDCl<sub>3</sub>) and <sup>19</sup>F NMR (470 MHz, CDCl<sub>3</sub>) spectra for 10**

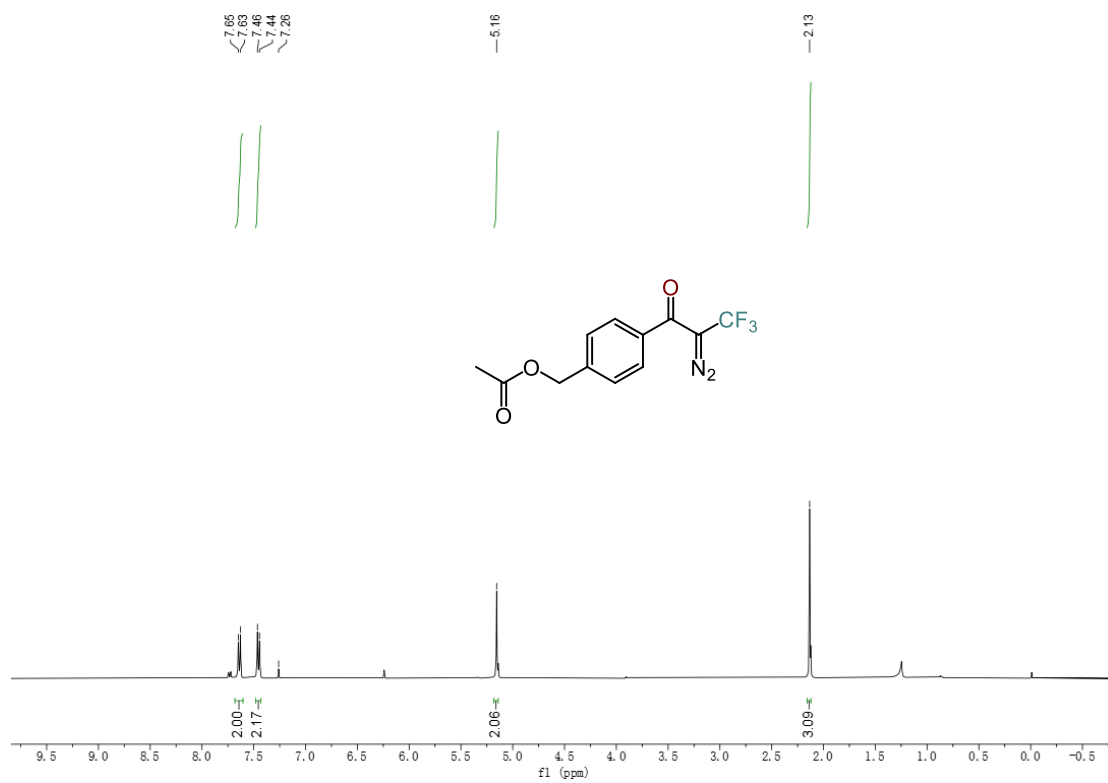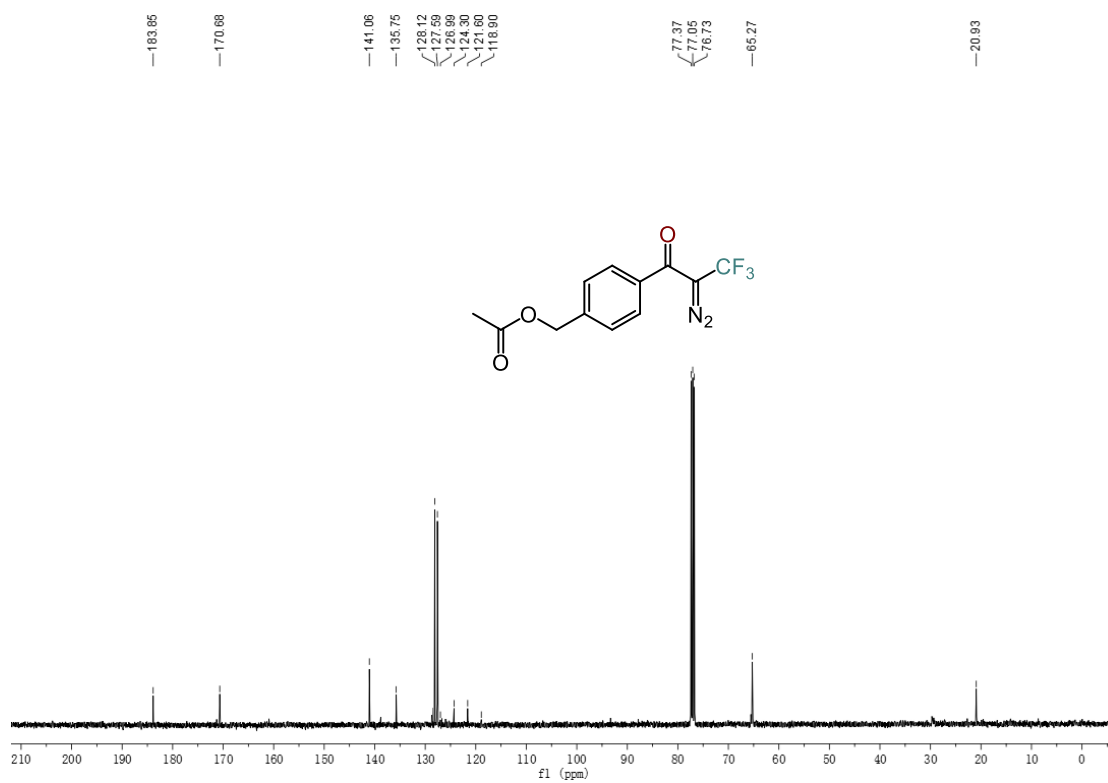

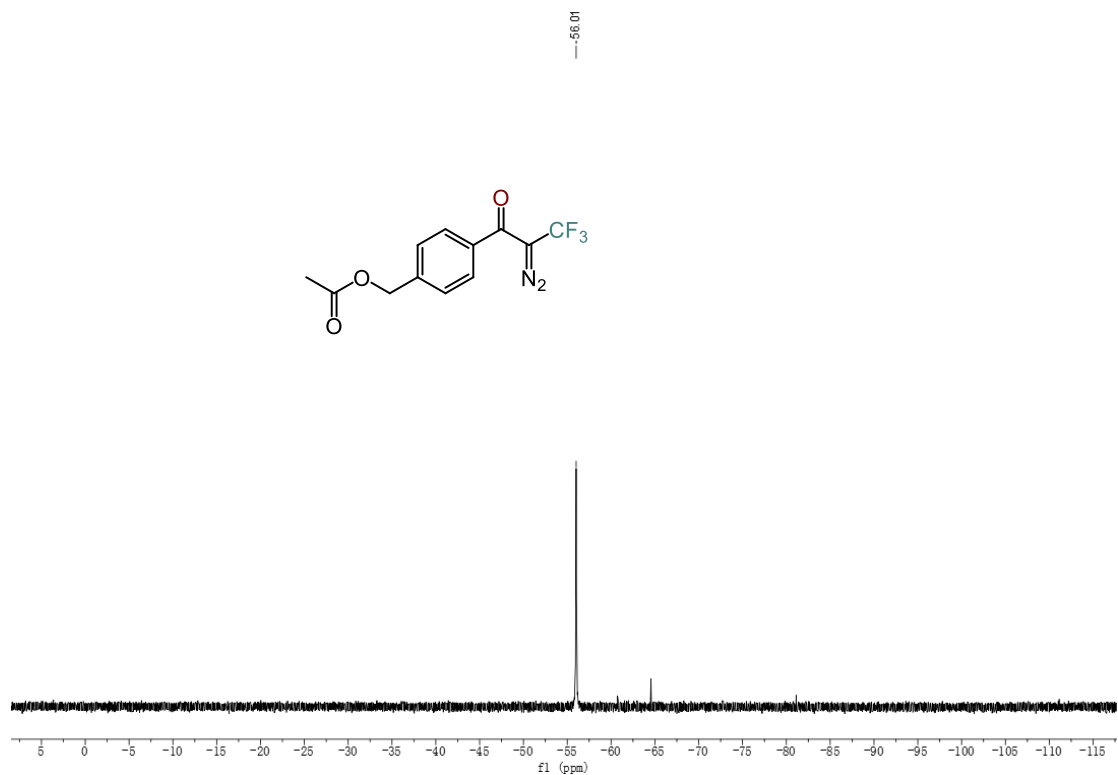

**$^1\text{H}$  NMR (600 MHz,  $\text{CDCl}_3$ ),  $^{13}\text{C}$  NMR (150 MHz,  $\text{CDCl}_3$ ) and  $^{19}\text{F}$  NMR (564 MHz,  $\text{CDCl}_3$ ) spectra for 13**

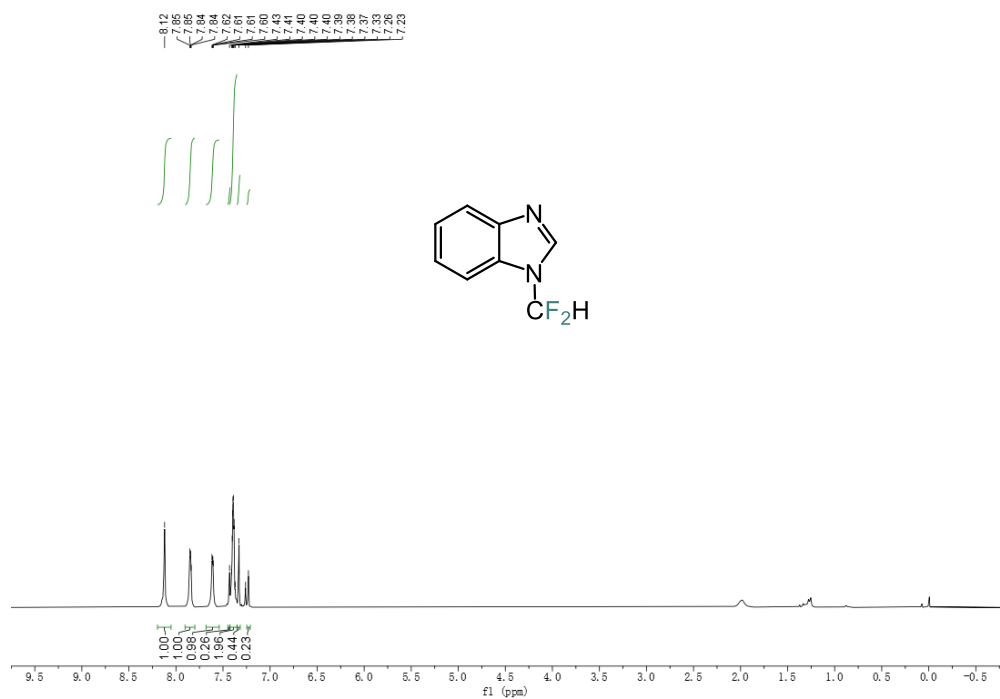

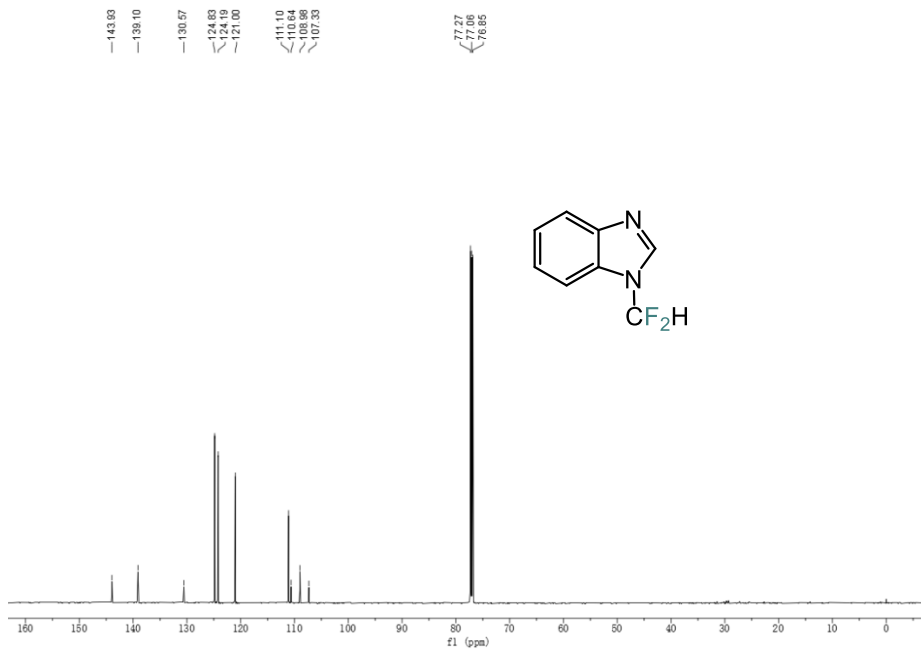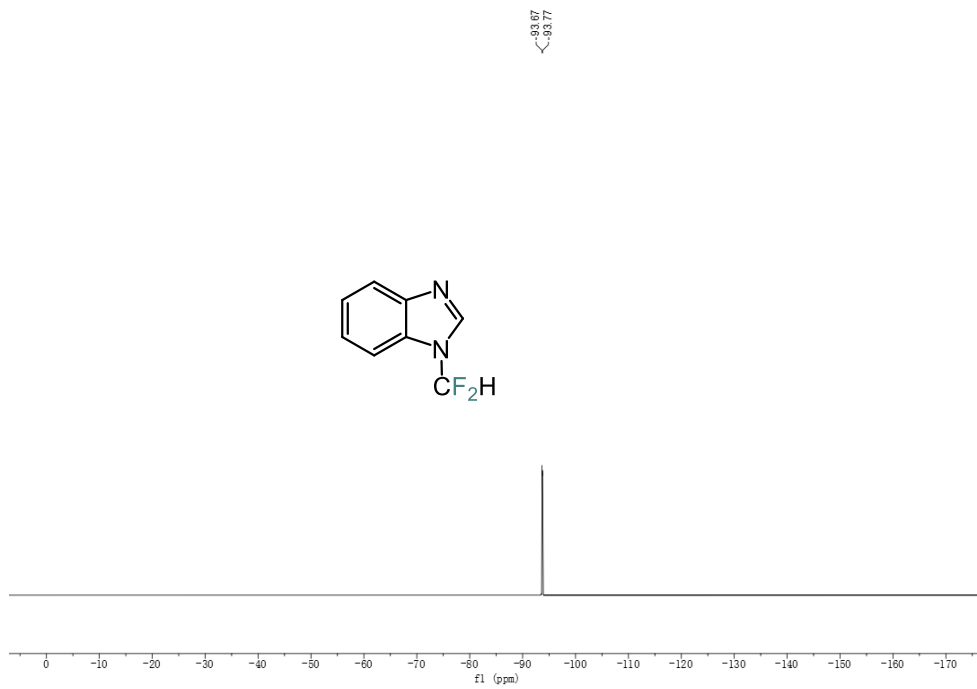

Supplement: d6ob00710d1.pdf [file d6ob00710d1.pdf]
